# Supplementary material for: Transcriptomic response of the Antarctic pteropod Limacina helicina antarctica to ocean acidification
Source: BMC Genomics. 2017 Oct 23;18:812. doi: 10.1186/s12864-017-4161-0 (PMC5653985; doi:10.1186/s12864-017-4161-0)
Supplement: Supplementary file 2 — Seasonal differential expression gene list. This file provides the list of all genes identified in the seasonal differential gene expression analysis. File contains, sequence identifier, sequence description, enzyme codes, gene ontology identifiers, gene ontology names, logFC (Fold Change), logCPM (Counts per million), P-values, and FDR (false discovery rate). (XLSX 322 kb) [file 12864_2017_4161_MOESM2_ESM.xlsx]

## Sheet: Additional_file_1.txt
	Row.names	Sequence.Description	Enzyme.Code	Annotation.GO.ID	Annotation.GO.Term	Annotation.GO.Category	pH8.3_v_8.1_day1_logFC	pH8.3_v_8.1_day1_logCPM	pH8.3_v_8.1_day1_PValue	pH8.3_v_8.1_day1_FDR	pH8.3_v_8.1_day7_logFC	pH8.3_v_8.1_day7_logCPM	pH8.3_v_8.1_day7_PValue	pH8.3_v_8.1_day7_FDR
2202	TR602889|c1_g1_i3	GTP-binding nuclear Ran	EC:3.6.1,EC:3.6.1.15	GO:0003924,GO:0005525,GO:0005634,GO:0006886,GO:0006913,GO:0007264	GTPase activity,GTP binding,nucleus,intracellular protein transport,nucleocytoplasmic transport,small GTPase mediated signal transduction	Molecular Function,Molecular Function,Cellular Component,Biological Process,Biological Process,Biological Process	-12.1438	5.51333	3.01936e-05	0.0230499	NA	NA	NA	NA
998	TR537538|c0_g1_i6	---NA---					-11.0737	4.61164	2.10719e-12	8.76706e-08	NA	NA	NA	NA
2238	TR605208|c2_g3_i12	Intron-binding aquarius		GO:0000398,GO:0016020,GO:0044822,GO:0071013	mRNA splicing via spliceosome,membrane,RNA binding,catalytic step 2 spliceosome	Biological Process,Cellular Component,Molecular Function,Cellular Component	-10.2257	3.61854	7.96385e-18	6.6268e-13	NA	NA	NA	NA
1318	TR555444|c1_g1_i10	---NA---					-9.68259	2.08285	1.55262e-05	0.0167786	NA	NA	NA	NA
1682	TR573703|c1_g1_i8	---NA---					-9.44436	2.08869	4.04407e-05	0.027591	NA	NA	NA	NA
258	TR401898|c4_g1_i4	PREDICTED: macrophage mannose receptor 1-like, partial		GO:0006952,GO:0006955,GO:0016020,GO:0044763,GO:0050794	defense response,immune response,membrane,single-organism cellular process,regulation of cellular process	Biological Process,Biological Process,Cellular Component,Biological Process,Biological Process	-8.90682	1.74652	3.24932e-09	3.86255e-05	NA	NA	NA	NA
1743	TR576221|c0_g2_i9	26S proteasome non-ATPase regulatory subunit 2		GO:0000502,GO:0030234,GO:0042176,GO:0050790	proteasome complex,enzyme regulator activity,regulation of protein catabolic process,regulation of catalytic activity	Cellular Component,Molecular Function,Biological Process,Biological Process	-8.79045	5.46029	1.88907e-09	2.61986e-05	NA	NA	NA	NA
1281	TR554318|c2_g1_i2	peptidyl-prolyl cis-trans isomerase-like	EC:5.2.1.8	GO:0000413,GO:0003755,GO:0006457	protein peptidyl-prolyl isomerization,peptidyl-prolyl cis-trans isomerase activity,protein folding	Biological Process,Molecular Function,Biological Process	-8.7825	2.52352	0.00012186	0.0437711	-10.2165	2.52352	1.18606e-05	0.00515688
1847	TR582314|c0_g3_i6	misato homolog 1-like					-8.49201	2.29986	1.19045e-05	0.0145675	NA	NA	NA	NA
1425	TR560371|c1_g1_i9	DDB1- and CUL4-associated factor 15					-8.44091	0.998365	6.11435e-06	0.0101756	NA	NA	NA	NA
2373	TR613454|c5_g1_i1	---NA---					-7.86594	1.09049	1.95454e-05	0.0187518	-9.1507	1.09049	6.37439e-07	0.00123353
1246	TR551238|c2_g1_i6	---NA---					-7.72511	-0.039369	8.86283e-10	1.47497e-05	NA	NA	NA	NA
1752	TR576868|c2_g2_i2	Angio-associated migratory cell					-7.71179	1.79158	8.26106e-05	0.0370285	NA	NA	NA	NA
1657	TR571576|c0_g1_i4	---NA---					-7.66091	0.474235	8.92083e-07	0.00353482	NA	NA	NA	NA
904	TR532397|c1_g5_i3	RNA-binding 45-like isoform X1					-7.63182	4.15396	0.000110412	0.0417935	NA	NA	NA	NA
1284	TR554485|c4_g2_i11	Ubiquitin-like modifier-activating enzyme 1		GO:0006464,GO:0008641,GO:0016021	cellular protein modification process,small protein activating enzyme activity,integral component of membrane	Biological Process,Molecular Function,Cellular Component	-7.57448	3.78307	3.1659e-10	6.58594e-06	NA	NA	NA	NA
2107	TR597925|c5_g1_i3	nuclear receptor-binding factor 2-like					-7.41702	0.0412574	0.000125489	0.0437711	NA	NA	NA	NA
1215	TR549632|c2_g1_i7	BTB POZ domain-containing 17-like					-7.39369	0.444356	3.04134e-06	0.00609147	NA	NA	NA	NA
473	TR436195|c0_g1_i2	arf-GAP with Rho-GAP ANK repeat and PH domain-containing 2-like					-7.33952	0.506195	2.49494e-06	0.00576526	NA	NA	NA	NA
2142	TR599400|c4_g2_i17	---NA---					-7.24787	-0.491274	1.67117e-05	0.0173824	NA	NA	NA	NA
1774	TR577878|c0_g2_i1	---NA---					-7.17228	0.39028	1.44386e-05	0.0160193	NA	NA	NA	NA
742	TR523633|c1_g1_i4	Tyrosine- kinase HTK16	EC:2.7.10,EC:2.7.10.2	GO:0000166,GO:0004715,GO:0005102,GO:0007169,GO:0016477,GO:0030154,GO:0031234,GO:0038083,GO:0042127,GO:0045087	nucleotide binding,non-membrane spanning protein tyrosine kinase activity,receptor binding,transmembrane receptor protein tyrosine kinase signaling pathway,cell migration,cell differentiation,extrinsic component of cytoplasmic side of plasma membrane,peptidyl-tyrosine autophosphorylation,regulation of cell proliferation,innate immune response	Molecular Function,Molecular Function,Molecular Function,Biological Process,Biological Process,Biological Process,Cellular Component,Biological Process,Biological Process,Biological Process	-7.16492	0.232679	2.56354e-06	0.00576526	NA	NA	NA	NA
456	TR432585|c5_g1_i8	gastrula zinc finger -like isoform X1					-7.12892	0.638727	0.000129496	0.0439815	NA	NA	NA	NA
2203	TR602939|c2_g4_i1	PREDICTED: uncharacterized protein C4orf22-like isoform X1					-7.04765	5.17371	4.57793e-11	1.26978e-06	NA	NA	NA	NA
1986	TR590482|c4_g5_i9	ADIPOR-like receptor CG5315-like					-7.03375	-0.0749792	3.9293e-05	0.0272468	NA	NA	NA	NA
1760	TR577246|c4_g1_i2	---NA---					-6.95822	-0.0174149	9.49486e-06	0.0127432	NA	NA	NA	NA
1053	TR539927|c0_g2_i3	hypothetical protein LOTGIDRAFT_195693					-6.88886	3.4568	1.22683e-06	0.00392639	NA	NA	NA	NA
249	TR401372|c1_g1_i7	PREDICTED: uncharacterized protein LOC101851072					-6.88513	-0.0894092	3.61331e-05	0.0259196	NA	NA	NA	NA
236	TR398731|c0_g2_i2	---NA---					-6.75198	3.8579	1.54068e-05	0.0167786	NA	NA	NA	NA
2281	TR607778|c1_g1_i4	---NA---					-6.74079	0.362285	0.000114056	0.0425592	NA	NA	NA	NA
2398	TR614231|c1_g1_i4	type I iodothyronine deiodinase		GO:0016020	membrane	Cellular Component	-6.68835	0.133251	9.39498e-07	0.00355348	NA	NA	NA	NA
1755	TR576921|c1_g2_i3	zinc finger MYM-type 1-like					-6.62494	0.618902	6.3762e-05	0.0327512	6.38492	0.618902	0.000148592	0.0177396
1000	TR537839|c2_g1_i6	Glutamate--cysteine ligase regulatory subunit		GO:0006750,GO:0017109,GO:0030234,GO:0035229	glutathione biosynthetic process,glutamate-cysteine ligase complex,enzyme regulator activity,positive regulation of glutamate-cysteine ligase activity	Biological Process,Cellular Component,Molecular Function,Biological Process	-6.45052	2.03255	1.60099e-07	0.000832623	NA	NA	NA	NA
1991	TR590523|c2_g1_i4	PREDICTED: uncharacterized protein LOC101860900					-6.2758	0.834222	8.81263e-06	0.0123426	NA	NA	NA	NA
1560	TR567321|c1_g1_i4	---NA---					-6.2712	-0.725198	5.17879e-06	0.00916878	NA	NA	NA	NA
556	TR445265|c0_g1_i4	dolichyl-diphosphooligosaccharide-- glycosyltransferase subunit 2-like		GO:0006487,GO:0008250,GO:0016021	protein N-linked glycosylation,oligosaccharyltransferase complex,integral component of membrane	Biological Process,Cellular Component,Cellular Component	-6.19098	4.73738	4.99054e-09	5.19084e-05	NA	NA	NA	NA
129	TR386624|c0_g1_i6	---NA---					-6.10642	0.911878	0.000155653	0.0494351	NA	NA	NA	NA
1647	TR571111|c6_g2_i2	---NA---					-6.06727	-0.489166	5.05034e-05	0.0297001	NA	NA	NA	NA
2179	TR602232|c0_g1_i6	ras GTP exchange son of		GO:0005085,GO:0005488,GO:0005694,GO:0050794	guanyl-nucleotide exchange factor activity,binding,chromosome,regulation of cellular process	Molecular Function,Molecular Function,Cellular Component,Biological Process	-6.06429	2.88672	7.77466e-06	0.0117625	NA	NA	NA	NA
1933	TR587706|c3_g2_i1	ankyrin repeat and IBR domain-containing 1-like		GO:0046872	metal ion binding	Molecular Function	-5.98764	-0.647658	1.61215e-05	0.0171986	NA	NA	NA	NA
521	TR442312|c0_g12_i2	probable polyamine oxidase 2					-5.84522	-0.523432	0.000145314	0.0474185	NA	NA	NA	NA
454	TR432566|c3_g1_i2	---NA---					-5.69503	0.353609	3.53723e-06	0.00668946	NA	NA	NA	NA
1858	TR582829|c2_g1_i4	---NA---					-5.58892	1.06798	1.88315e-05	0.01859	NA	NA	NA	NA
321	TR410814|c2_g2_i1	UPF0193 EVG1-like					-5.47489	1.65398	2.05215e-05	0.0189735	NA	NA	NA	NA
412	TR425995|c2_g1_i2	---NA---					-5.45128	0.880732	0.000108689	0.0417935	NA	NA	NA	NA
2030	TR592038|c0_g1_i2	peptidylglycine alpha-amidating monooxygenase	EC:1.14.17	GO:0005507,GO:0006518,GO:0016021,GO:0016715,GO:0055114	copper ion binding,peptide metabolic process,integral component of membrane,oxidoreductase activity acting on paired donors with incorporation or reduction of molecular oxygen reduced ascorbate as one donor and incorporation of one atom of oxygen,oxidation-reduction process	Molecular Function,Biological Process,Cellular Component,Molecular Function,Biological Process	-5.42605	0.407841	1.50664e-07	0.000832623	NA	NA	NA	NA
1489	TR563432|c7_g4_i7	TFIIH basal transcription factor complex helicase XPB subunit	EC:2.7.11,EC:2.7.11.23,EC:3.6.1,EC:3.6.1.3,EC:3.6.1.15	GO:0000439,GO:0000717,GO:0001666,GO:0003684,GO:0004003,GO:0005524,GO:0005525,GO:0005675,GO:0006265,GO:0006283,GO:0006293,GO:0006294,GO:0006295,GO:0006296,GO:0006361,GO:0006362,GO:0006363,GO:0006367,GO:0006368,GO:0006370,GO:0006468,GO:0006979,GO:0008022,GO:0008104,GO:0008134,GO:0008353,GO:0009650,GO:0016032,GO:0032564,GO:0035315,GO:0042277,GO:0043065,GO:0043138,GO:0045944,GO:0047485,GO:0048568,GO:…	core TFIIH complex,nucleotide-excision repair DNA duplex unwinding,response to hypoxia,damaged DNA binding,ATP-dependent DNA helicase activity,ATP binding,GTP binding,holo TFIIH complex,DNA topological change,transcription-coupled nucleotide-excision repair,nucleotide-excision repair preincision complex stabilization,nucleotide-excision repair preincision complex assembly,nucleotide-excision repa…	Cellular Component,Biological Process,Biological Process,Molecular Function,Molecular Function,Molecular Function,Molecular Function,Cellular Component,Biological Process,Biological Process,Biological Process,Biological Process,Biological Process,Biological Process,Biological Process,Biological Process,Biological Process,Biological Process,Biological Process,Biological Process,Biological Process,…	-5.38677	1.40991	1.85254e-05	0.0185725	NA	NA	NA	NA
1767	TR577432|c1_g1_i1	---NA---					-5.22827	-0.75529	7.21828e-05	0.0348065	-5.40408	-0.75529	3.05742e-05	0.00787733
2389	TR613726|c3_g4_i2	---NA---					-5.21084	-0.232052	5.52629e-05	0.0301719	NA	NA	NA	NA
727	TR522794|c1_g7_i9	MYCBP-associated -like isoform X1		GO:0008237,GO:0046872	metallopeptidase activity,metal ion binding	Molecular Function,Molecular Function	-4.96008	3.03927	5.31727e-05	0.0297001	NA	NA	NA	NA
1950	TR589057|c0_g1_i1	probable voltage-gated potassium channel subunit beta		GO:0016491,GO:0055114	oxidoreductase activity,oxidation-reduction process	Molecular Function,Biological Process	-4.94796	2.82537	1.69572e-06	0.00474839	NA	NA	NA	NA
1541	TR565848|c1_g3_i4	2-aminoethylphosphonate--pyruvate transaminase		GO:0008483	transaminase activity	Molecular Function	-4.85072	-0.409044	6.77942e-05	0.0335766	NA	NA	NA	NA
738	TR523625|c3_g1_i3	sodium calcium exchanger 2-like isoform X3		GO:0006810	transport	Biological Process	-4.75254	0.1466	9.42521e-05	0.0392782	NA	NA	NA	NA
2026	TR591835|c3_g6_i1	---NA---					-4.75023	-0.144122	6.62825e-05	0.0330265	NA	NA	NA	NA
293	TR405785|c1_g1_i6	---NA---					-4.74491	0.601846	0.00012209	0.0437711	NA	NA	NA	NA
1929	TR587662|c3_g1_i10	#NAME?	EC:2.1.1.77,EC:2.1.1	GO:0004719,GO:0006479	protein-L-isoaspartate (D-aspartate) O-methyltransferase activity,protein methylation	Molecular Function,Biological Process	-4.70285	1.16607	1.04816e-05	0.0138442	NA	NA	NA	NA
2196	TR602790|c5_g1_i7	---NA---					-4.64607	2.22331	0.000146346	0.0475689	NA	NA	NA	NA
737	TR523621|c0_g1_i2	---NA---					-4.60675	-0.449475	0.00010848	0.0417935	NA	NA	NA	NA
2121	TR598367|c2_g1_i1	cytochrome b561		GO:0016020,GO:0055114	membrane,oxidation-reduction process	Cellular Component,Biological Process	-4.60162	0.33529	5.31819e-05	0.0297001	NA	NA	NA	NA
1417	TR560167|c0_g4_i10	---NA---					-4.38778	4.9627	1.13827e-05	0.0141368	NA	NA	NA	NA
677	TR520986|c1_g1_i3	carbonyl reductase [NADPH] 1-like					-4.3336	0.739302	0.000118625	0.0431044	NA	NA	NA	NA
1675	TR573286|c1_g1_i4	PREDICTED: uncharacterized protein LOC101855745					-4.1744	-0.372574	0.000131722	0.0445559	NA	NA	NA	NA
1544	TR565900|c3_g1_i2	nuclear pore complex Nup133-like					-4.11487	2.01797	6.90057e-05	0.0335792	5.67631	2.01797	1.7002e-06	0.00218913
523	TR443846|c2_g3_i4	---NA---					-4.09617	0.649278	0.000106038	0.041775	NA	NA	NA	NA
1178	TR546536|c3_g4_i6	COMM domain-containing 3-like					-3.86942	2.22751	6.50858e-05	0.0327669	NA	NA	NA	NA
524	TR443846|c2_g3_i6	---NA---					-3.82295	2.01093	2.65161e-05	0.0218459	NA	NA	NA	NA
1252	TR551758|c1_g1_i3	synaptojanin-2-binding -like					-3.4112	-0.309151	0.000126703	0.0437711	NA	NA	NA	NA
2002	TR590759|c2_g1_i6	---NA---					-3.2362	0.603853	2.26607e-05	0.0200867	NA	NA	NA	NA
1824	TR580860|c6_g1_i4	Adenylate kinase 3	EC:2.7.4.3,EC:2.7.4.10	GO:0004017,GO:0005758,GO:0005759,GO:0006172,GO:0006756,GO:0016310,GO:0032550,GO:0032555,GO:0035639,GO:0042802,GO:0046039,GO:0046041,GO:0046051,GO:0046060,GO:0046899,GO:0051260	adenylate kinase activity,mitochondrial intermembrane space,mitochondrial matrix,ADP biosynthetic process,AMP phosphorylation,phosphorylation,purine ribonucleoside binding,purine ribonucleotide binding,purine ribonucleoside triphosphate binding,identical protein binding,GTP metabolic process,ITP metabolic process,UTP metabolic process,dATP metabolic process,nucleoside triphosphate adenylate kinas…	Molecular Function,Cellular Component,Cellular Component,Biological Process,Biological Process,Biological Process,Molecular Function,Molecular Function,Molecular Function,Molecular Function,Biological Process,Biological Process,Biological Process,Biological Process,Molecular Function,Biological Process	-3.18932	3.00685	6.0319e-05	0.0315673	NA	NA	NA	NA
691	TR521427|c3_g1_i1	---NA---					-3.16819	1.83567	5.8578e-07	0.00243717	NA	NA	NA	NA
2071	TR595416|c0_g3_i7	actin-depolymerizing factor 4-like					-3.11532	4.88635	1.96884e-05	0.0187518	NA	NA	NA	NA
68	TR379843|c1_g5_i4	---NA---					-3.1089	2.35723	8.27691e-05	0.0370285	NA	NA	NA	NA
1071	TR540938|c0_g1_i6	---NA---					-3.07404	2.92889	2.56043e-06	0.00576526	NA	NA	NA	NA
1437	TR560966|c1_g1_i2	leucine-rich repeat and guanylate kinase domain-containing -like					-3.02718	3.52968	1.10668e-05	0.0140843	NA	NA	NA	NA
1313	TR555414|c2_g1_i2	---NA---					-3.01299	1.1976	0.000135967	0.0451784	NA	NA	NA	NA
1406	TR559944|c1_g1_i5	---NA---					-2.99967	-0.0261019	4.69133e-05	0.0282877	NA	NA	NA	NA
997	TR537127|c1_g2_i2	---NA---					-2.99882	3.01391	2.09503e-08	0.00017433	NA	NA	NA	NA
2065	TR594927|c0_g2_i2	---NA---					-2.99721	5.65321	1.769e-06	0.00474839	-2.02986	5.65321	0.000572557	0.0339126
163	TR390339|c2_g6_i1	---NA---					-2.77819	0.987917	2.88963e-05	0.0225012	NA	NA	NA	NA
1433	TR560663|c0_g1_i4	---NA---					-2.7496	3.46934	5.21644e-05	0.0297001	-1.88117	3.46934	0.00075782	0.0389941
1884	TR584905|c0_g4_i1	---NA---					-2.73485	-0.249372	2.87256e-05	0.0225012	NA	NA	NA	NA
528	TR443937|c1_g1_i3	---NA---					-2.66048	0.401966	1.39513e-05	0.0159752	NA	NA	NA	NA
63	TR379672|c1_g2_i5	---NA---					-2.6511	0.505726	0.000127734	0.0437711	NA	NA	NA	NA
903	TR532270|c5_g1_i4	PREDICTED: 60S ribosomal protein L8 isoform X3		GO:0003735,GO:0005840,GO:0006412	structural constituent of ribosome,ribosome,translation	Molecular Function,Cellular Component,Biological Process	-2.54676	9.07032	2.41034e-05	0.020677	-2.5631	9.07032	2.14625e-05	0.00681647
1583	TR568530|c0_g1_i2	collagen alpha-1(XII) chain-like					-2.36796	2.6481	0.00011699	0.0428849	NA	NA	NA	NA
1166	TR546286|c5_g2_i2	---NA---					-2.2013	1.90102	5.5477e-05	0.0301719	NA	NA	NA	NA
1356	TR557343|c3_g1_i3	---NA---					-2.17665	0.744861	8.9984e-05	0.0386344	NA	NA	NA	NA
1651	TR571327|c0_g2_i1	---NA---					-1.95047	2.72308	0.000116085	0.0428796	NA	NA	NA	NA
1633	TR570599|c3_g3_i4	---NA---					-1.90495	4.03088	8.13884e-05	0.0370077	NA	NA	NA	NA
1339	TR556756|c0_g3_i3	---NA---					-1.80671	3.43957	8.75297e-06	0.0123426	NA	NA	NA	NA
711	TR522155|c1_g1_i2	probable pyruvate dehydrogenase E1 component subunit mitochondrial	EC:1.2.4.1	GO:0004739,GO:0006086,GO:0043231,GO:0055114	pyruvate dehydrogenase (acetyl-transferring) activity,acetyl-CoA biosynthetic process from pyruvate,intracellular membrane-bounded organelle,oxidation-reduction process	Molecular Function,Biological Process,Cellular Component,Biological Process	-1.8058	5.76935	1.9831e-05	0.0187518	NA	NA	NA	NA
1966	TR589726|c1_g3_i3	---NA---					-1.73899	3.81564	0.000125947	0.0437711	NA	NA	NA	NA
712	TR522168|c0_g2_i4	Nuclear and cytoplasmic polyadenylated RNA-binding					-1.59835	6.01448	1.11711e-05	0.0140843	NA	NA	NA	NA
1592	TR568910|c1_g5_i1	ribosomal L34		GO:0003723,GO:0003735,GO:0006412,GO:0022625,GO:0042254	RNA binding,structural constituent of ribosome,translation,cytosolic large ribosomal subunit,ribosome biogenesis	Molecular Function,Molecular Function,Biological Process,Cellular Component,Biological Process	-1.36159	8.36699	7.75038e-05	0.0362313	NA	NA	NA	NA
1780	TR578354|c0_g1_i1	---NA---					-1.31173	3.77086	0.00012835	0.0437711	NA	NA	NA	NA
376	TR419255|c1_g1_i1	E3 ubiquitin- ligase UBR4					1.27925	5.67808	6.27248e-05	0.0324186	NA	NA	NA	NA
1944	TR588554|c0_g2_i8	sperm-associated antigen 17-like					1.49967	2.89221	8.52788e-05	0.0375457	NA	NA	NA	NA
500	TR440592|c0_g1_i2	microtubule-actin cross-linking factor isoforms 1 2 3 5-like isoform X9					1.60137	3.92317	0.000103067	0.0408395	NA	NA	NA	NA
48	TR379309|c2_g1_i2	---NA---					1.68135	3.30241	0.000123051	0.0437711	NA	NA	NA	NA
207	TR393644|c2_g3_i2	---NA---					1.69238	2.0234	0.000137326	0.0453454	NA	NA	NA	NA
311	TR410664|c1_g4_i1	Neurogenic locus Notch					1.72885	2.41235	0.000152968	0.0489676	NA	NA	NA	NA
1446	TR561341|c1_g1_i1	DNA repair RAD50		GO:0000228,GO:0000723,GO:0003677,GO:0006281,GO:0006310,GO:0016787,GO:0044427,GO:0044763	nuclear chromosome,telomere maintenance,DNA binding,DNA repair,DNA recombination,hydrolase activity,chromosomal part,single-organism cellular process	Cellular Component,Biological Process,Molecular Function,Biological Process,Biological Process,Molecular Function,Cellular Component,Biological Process	1.73362	2.81697	4.59059e-05	0.0282877	NA	NA	NA	NA
231	TR396005|c1_g1_i2	---NA---					1.78593	3.21742	6.45976e-05	0.0327669	NA	NA	NA	NA
879	TR530839|c2_g1_i1	Disintegrin and metallo ase domain-containing 10					1.79326	2.7644	9.84317e-05	0.0395681	NA	NA	NA	NA
270	TR403888|c4_g1_i1	---NA---					1.85631	2.6425	0.000149329	0.0483495	NA	NA	NA	NA
223	TR395851|c2_g1_i1	---NA---					1.88828	6.08207	4.22549e-05	0.0281033	NA	NA	NA	NA
707	TR521808|c5_g1_i1	apoptosis-stimulating of p53 2-like isoform X5					1.90092	1.25414	0.000125614	0.0437711	NA	NA	NA	NA
1218	TR549692|c3_g1_i1	PREDICTED: uncharacterized protein LOC101859599					1.90869	4.26764	0.000101841	0.0406849	NA	NA	NA	NA
2233	TR605008|c2_g1_i1	zinc finger 423-like					1.98393	3.34637	0.000132701	0.0447052	NA	NA	NA	NA
1061	TR540391|c4_g3_i6	dynactin subunit 1-like isoform X5		GO:0015630,GO:0043234,GO:0044430	microtubule cytoskeleton,protein complex,cytoskeletal part	Cellular Component,Cellular Component,Cellular Component	1.99287	1.7672	0.000127476	0.0437711	NA	NA	NA	NA
1440	TR561043|c1_g1_i1	titin- partial					2.01928	3.01289	3.00344e-05	0.0230499	NA	NA	NA	NA
2075	TR595668|c1_g1_i3	---NA---					2.02631	3.4389	5.72193e-05	0.0309173	NA	NA	NA	NA
2419	TR615616|c1_g2_i1	---NA---					2.05033	2.64925	5.93678e-05	0.0314871	NA	NA	NA	NA
760	TR525090|c4_g1_i1	dynein heavy chain axonemal-like	EC:3.6.1,EC:3.6.1.3,EC:3.6.1.15	GO:0003341,GO:0003777,GO:0005509,GO:0005524,GO:0005737,GO:0016887,GO:0036156,GO:0036159	cilium movement,microtubule motor activity,calcium ion binding,ATP binding,cytoplasm,ATPase activity,inner dynein arm,inner dynein arm assembly	Biological Process,Molecular Function,Molecular Function,Molecular Function,Cellular Component,Molecular Function,Cellular Component,Biological Process	2.07744	2.57719	4.04527e-05	0.027591	NA	NA	NA	NA
616	TR517948|c3_g3_i1	metabotropic glutamate receptor 2-like isoform X3					2.08808	2.42038	9.53107e-05	0.0392782	NA	NA	NA	NA
94	TR384004|c2_g1_i1	PREDICTED: uncharacterized protein LOC101857563					2.10282	2.64936	4.30807e-05	0.0281033	NA	NA	NA	NA
390	TR422510|c2_g1_i1	girdin isoform X3		GO:0005515,GO:0044444,GO:0044763,GO:0050794	protein binding,cytoplasmic part,single-organism cellular process,regulation of cellular process	Molecular Function,Cellular Component,Biological Process,Biological Process	2.11431	4.93392	4.32301e-05	0.0281033	NA	NA	NA	NA
508	TR440648|c3_g3_i4	hypothetical protein BRAFLDRAFT_69759					2.12808	3.98198	5.19814e-05	0.0297001	NA	NA	NA	NA
662	TR520370|c2_g2_i9	---NA---					2.13684	2.47439	9.11025e-05	0.0388755	NA	NA	NA	NA
876	TR530591|c3_g4_i9	transformation transcription domain-associated -like isoform X2		GO:0000123,GO:0016021,GO:0016301,GO:0016310,GO:0016573	histone acetyltransferase complex,integral component of membrane,kinase activity,phosphorylation,histone acetylation	Cellular Component,Cellular Component,Molecular Function,Biological Process,Biological Process	2.15569	0.50012	6.11904e-05	0.0318232	NA	NA	NA	NA
290	TR405756|c4_g1_i1	---NA---					2.15608	4.97163	2.7448e-05	0.0223919	NA	NA	NA	NA
2043	TR593079|c2_g3_i2	---NA---					2.1696	6.15435	8.89971e-06	0.0123426	NA	NA	NA	NA
1230	TR550351|c2_g10_i4	mitogen-activated kinase-binding 1					2.22465	5.2471	0.000134875	0.0450728	NA	NA	NA	NA
2318	TR609782|c3_g1_i1	---NA---					2.22714	1.68453	3.4431e-05	0.0253543	NA	NA	NA	NA
2137	TR599125|c3_g5_i1	PREDICTED: uncharacterized protein LOC101851458					2.25839	2.75625	0.000125916	0.0437711	NA	NA	NA	NA
1961	TR589444|c0_g1_i1	---NA---					2.28495	1.21346	6.53676e-05	0.0327669	NA	NA	NA	NA
148	TR389948|c2_g2_i1	---NA---					2.29814	2.83071	0.000113426	0.042515	NA	NA	NA	NA
186	TR391613|c5_g3_i1	glutamate-rich 3-like isoform X4					2.30636	1.01636	4.86052e-05	0.0288892	NA	NA	NA	NA
1912	TR586724|c3_g2_i1	flocculation FLO10-like					2.3236	2.11426	6.45786e-05	0.0327669	NA	NA	NA	NA
983	TR536468|c3_g1_i2	---NA---					2.35818	2.76857	1.42068e-05	0.0159752	NA	NA	NA	NA
287	TR405731|c1_g1_i1	protocadherin Fat 4-like					2.38193	1.98023	0.000102188	0.0406849	NA	NA	NA	NA
594	TR454868|c2_g2_i3	---NA---					2.39254	0.461609	7.96136e-05	0.0366007	NA	NA	NA	NA
2054	TR594203|c1_g1_i1	Dynein heavy chain axonemal	EC:3.6.1,EC:3.6.1.3,EC:3.6.1.15	GO:0001539,GO:0003777,GO:0005524,GO:0005858,GO:0007018,GO:0016887	cilium or flagellum-dependent cell motility,microtubule motor activity,ATP binding,axonemal dynein complex,microtubule-based movement,ATPase activity	Biological Process,Molecular Function,Molecular Function,Cellular Component,Biological Process,Molecular Function	2.39916	0.783966	4.0815e-05	0.0276119	NA	NA	NA	NA
280	TR403971|c2_g2_i2	dynein beta ciliary-like	EC:3.6.1,EC:3.6.1.3,EC:3.6.1.15	GO:0003777,GO:0005524,GO:0005737,GO:0005874,GO:0007018,GO:0016887,GO:0030030,GO:0030286,GO:0031514	microtubule motor activity,ATP binding,cytoplasm,microtubule,microtubule-based movement,ATPase activity,cell projection organization,dynein complex,motile cilium	Molecular Function,Molecular Function,Cellular Component,Cellular Component,Biological Process,Molecular Function,Biological Process,Cellular Component,Cellular Component	2.43243	4.1243	0.000150389	0.0485041	NA	NA	NA	NA
90	TR383980|c1_g1_i1	PREDICTED: uncharacterized protein LOC101863143					2.45016	4.25569	2.04235e-05	0.0189735	NA	NA	NA	NA
781	TR526234|c0_g1_i1	---NA---					2.48885	0.0844356	0.000136277	0.0451784	NA	NA	NA	NA
136	TR387087|c0_g1_i1	---NA---					2.51734	2.08405	3.36521e-05	0.025002	NA	NA	NA	NA
155	TR390008|c2_g2_i1	dynein heavy chain axonemal					2.52094	3.40707	0.000153004	0.0489676	NA	NA	NA	NA
2407	TR614472|c0_g2_i2	cannabidiolic acid synthase-like 1-like					2.55843	2.47513	9.55502e-05	0.0392782	NA	NA	NA	NA
2088	TR596918|c1_g3_i6	---NA---					2.55845	0.747391	8.37887e-05	0.0372842	NA	NA	NA	NA
799	TR527144|c1_g1_i1	---NA---					2.60073	0.106018	0.000108039	0.0417935	NA	NA	NA	NA
1336	TR556535|c6_g1_i4	WD repeat-containing 16-like					2.61408	3.10804	8.15734e-06	0.0121211	NA	NA	NA	NA
987	TR536636|c1_g1_i2	---NA---					2.61753	1.61408	6.86216e-05	0.0335792	NA	NA	NA	NA
1614	TR570032|c0_g2_i1	---NA---					2.62024	1.63601	2.86854e-05	0.0225012	NA	NA	NA	NA
538	TR444712|c0_g1_i1	---NA---					2.6206	2.88169	0.000142122	0.0465595	NA	NA	NA	NA
1727	TR575866|c1_g1_i2	taurine transporter	EC:3.4,EC:3.4.19.12	GO:0005328,GO:0006511,GO:0006836,GO:0016021,GO:0016579,GO:0036459,GO:0055085	neurotransmitter:sodium symporter activity,ubiquitin-dependent protein catabolic process,neurotransmitter transport,integral component of membrane,protein deubiquitination,thiol-dependent ubiquitinyl hydrolase activity,transmembrane transport	Molecular Function,Biological Process,Biological Process,Cellular Component,Biological Process,Molecular Function,Biological Process	2.63077	0.415002	9.38615e-05	0.0392782	NA	NA	NA	NA
1934	TR587974|c0_g1_i2	---NA---					2.65307	3.93304	1.24114e-05	0.0149677	NA	NA	NA	NA
2082	TR596349|c0_g1_i2	tubulin polyglutamylase TTLL7-like		GO:0006464	cellular protein modification process	Biological Process	2.70654	0.203917	0.000124818	0.0437711	NA	NA	NA	NA
403	TR423558|c0_g1_i1	Zinc finger 40		GO:0005488	binding	Molecular Function	2.72853	0.480289	2.26684e-05	0.0200867	NA	NA	NA	NA
1325	TR555988|c0_g2_i4	---NA---					2.79154	5.38678	2.4601e-05	0.0206775	NA	NA	NA	NA
2211	TR603724|c3_g4_i1	---NA---					2.79562	1.11542	4.43264e-05	0.0282877	NA	NA	NA	NA
1353	TR557237|c0_g1_i2	Dynein heavy chain axonemal	EC:3.6.1,EC:3.6.1.3,EC:3.6.1.15	GO:0003777,GO:0003779,GO:0005524,GO:0007018,GO:0016301,GO:0016310,GO:0016887,GO:0030286	microtubule motor activity,actin binding,ATP binding,microtubule-based movement,kinase activity,phosphorylation,ATPase activity,dynein complex	Molecular Function,Molecular Function,Molecular Function,Biological Process,Molecular Function,Biological Process,Molecular Function,Cellular Component	2.79781	1.06438	0.000110497	0.0417935	NA	NA	NA	NA
537	TR444704|c1_g4_i2	---NA---					2.94891	0.559959	0.000138262	0.045474	NA	NA	NA	NA
375	TR419254|c4_g1_i1	Protocadherin Fat 4		GO:0048513	animal organ development	Biological Process	3.00363	2.20313	1.03284e-06	0.00368985	NA	NA	NA	NA
2098	TR597150|c3_g1_i3	Transcription elongation factor SPT5		GO:0003746,GO:0005634,GO:0006357,GO:0006414,GO:0032784	translation elongation factor activity,nucleus,regulation of transcription from RNA polymerase II promoter,translational elongation,regulation of DNA-templated transcription elongation	Molecular Function,Cellular Component,Biological Process,Biological Process,Biological Process	3.006	1.74231	4.45478e-05	0.0282877	NA	NA	NA	NA
568	TR449344|c1_g1_i3	EF-hand calcium-binding domain-containing 6					3.01503	1.21068	8.51176e-05	0.0375457	NA	NA	NA	NA
895	TR531520|c1_g4_i1	---NA---					3.03585	2.27028	5.31375e-05	0.0297001	NA	NA	NA	NA
383	TR420223|c1_g1_i1	---NA---					3.057	4.19239	1.27403e-06	0.00392642	NA	NA	NA	NA
520	TR442294|c3_g1_i1	Metabotropic glutamate receptor 5					3.05857	1.27025	2.20557e-07	0.00107957	NA	NA	NA	NA
2056	TR594318|c4_g5_i1	PREDICTED: uncharacterized protein LOC101852080, partial					3.10167	0.632414	6.85924e-06	0.0109762	NA	NA	NA	NA
756	TR524402|c1_g1_i2	---NA---					3.11697	1.32878	4.54843e-05	0.0282877	NA	NA	NA	NA
948	TR533916|c1_g2_i1	---NA---					3.19631	4.06046	3.1368e-06	0.00609147	NA	NA	NA	NA
242	TR401281|c2_g1_i3	---NA---					3.22918	0.664153	5.82111e-05	0.0312503	NA	NA	NA	NA
2138	TR599125|c3_g6_i2	---NA---					3.26169	0.0651747	1.79711e-05	0.0182365	NA	NA	NA	NA
2334	TR610391|c1_g1_i1	Methylcytosine dioxygenase TET1		GO:0003677,GO:0008270,GO:0051213,GO:0055114	DNA binding,zinc ion binding,dioxygenase activity,oxidation-reduction process	Molecular Function,Molecular Function,Molecular Function,Biological Process	3.30484	-0.52532	9.58223e-05	0.0392782	NA	NA	NA	NA
724	TR522660|c0_g3_i1	---NA---					3.30497	-0.259156	1.6481e-05	0.0173595	NA	NA	NA	NA
143	TR387270|c0_g1_i1	neurofilament heavy polypeptide-like		GO:0004970,GO:0016020	ionotropic glutamate receptor activity,membrane	Molecular Function,Cellular Component	3.31441	0.561303	0.000109529	0.0417935	NA	NA	NA	NA
386	TR420294|c1_g1_i1	---NA---					3.3539	1.0312	4.63455e-05	0.0282877	NA	NA	NA	NA
1419	TR560241|c0_g1_i1	hypothetical protein LOTGIDRAFT_56145, partial					3.3764	-0.681131	5.20433e-05	0.0297001	NA	NA	NA	NA
1217	TR549692|c2_g1_i1	A-kinase anchor 9-like					3.4166	-0.191131	2.75031e-06	0.00579872	NA	NA	NA	NA
1695	TR574260|c5_g1_i6	nervana isoform A		GO:0005886,GO:0006812,GO:0008324	plasma membrane,cation transport,cation transmembrane transporter activity	Cellular Component,Biological Process,Molecular Function	3.46811	3.63726	9.00731e-05	0.0386344	NA	NA	NA	NA
128	TR386615|c2_g3_i3	N-acetylated-alpha-linked acidic dipeptidase		GO:0004497	monooxygenase activity	Molecular Function	3.64892	1.08043	2.43743e-05	0.0206775	NA	NA	NA	NA
327	TR410916|c0_g2_i2	Tetratricopeptide repeat 6					3.68495	2.64394	2.05184e-06	0.00533548	NA	NA	NA	NA
138	TR387215|c1_g2_i1	protocadherin Fat 4-like					3.73761	1.27645	1.72823e-05	0.0177541	NA	NA	NA	NA
1298	TR554824|c1_g2_i5	Histone-lysine N-methyltransferase SUV39H2		GO:0008168,GO:0032259,GO:0043229,GO:0046872	methyltransferase activity,methylation,intracellular organelle,metal ion binding	Molecular Function,Biological Process,Cellular Component,Molecular Function	3.78	0.357532	1.89897e-05	0.01859	NA	NA	NA	NA
89	TR383973|c4_g5_i1	cadherin-23-like isoform X1					3.78283	0.193058	6.71849e-06	0.0109618	NA	NA	NA	NA
2103	TR597652|c1_g1_i6	---NA---					3.79984	-0.0389934	2.88386e-05	0.0225012	NA	NA	NA	NA
1411	TR560013|c2_g1_i7	---NA---					3.89497	-0.632698	9.7655e-05	0.0394465	NA	NA	NA	NA
748	TR523852|c1_g3_i1	---NA---					3.96055	0.434443	4.66133e-05	0.0282877	NA	NA	NA	NA
2350	TR611698|c1_g2_i1	PREDICTED: uncharacterized protein LOC101860951					4.02851	2.74211	0.000121719	0.0437711	NA	NA	NA	NA
2418	TR615616|c1_g1_i2	---NA---					4.17527	-0.341854	7.49339e-05	0.035428	NA	NA	NA	NA
1618	TR570065|c0_g1_i2	---NA---					4.27295	3.53747	1.09314e-07	0.000699704	NA	NA	NA	NA
2042	TR593067|c0_g6_i1	eukaryotic translation initiation factor 3 subunit B		GO:0000166,GO:0003743,GO:0005852,GO:0006413,GO:0031369,GO:0070993	nucleotide binding,translation initiation factor activity,eukaryotic translation initiation factor 3 complex,translational initiation,translation initiation factor binding,translation preinitiation complex	Molecular Function,Molecular Function,Cellular Component,Biological Process,Molecular Function,Cellular Component	4.29962	1.5652	0.000110142	0.0417935	NA	NA	NA	NA
1086	TR542287|c3_g1_i3	zinc finger 135-like	EC:2.1.1.43,EC:2.1.1	GO:0003677,GO:0006355,GO:0010604,GO:0016571,GO:0018024,GO:0043229,GO:0045935,GO:0060903	DNA binding,regulation of transcription DNA-templated,positive regulation of macromolecule metabolic process,histone methylation,histone-lysine N-methyltransferase activity,intracellular organelle,positive regulation of nucleobase-containing compound metabolic process,positive regulation of meiosis I	Molecular Function,Biological Process,Biological Process,Biological Process,Molecular Function,Cellular Component,Biological Process,Biological Process	4.31111	0.155177	9.4189e-06	0.0127432	NA	NA	NA	NA
406	TR423606|c3_g1_i3	ankyrin repeat domain-containing 50-like					4.34954	-0.139681	8.97567e-05	0.0386344	NA	NA	NA	NA
925	TR533150|c1_g1_i4	---NA---					4.44488	0.0951645	7.38981e-05	0.0351379	NA	NA	NA	NA
573	TR450627|c4_g4_i3	---NA---					4.45004	1.33399	3.71046e-05	0.026389	NA	NA	NA	NA
1713	TR575710|c0_g1_i3	PREDICTED: uncharacterized protein LOC101851458					4.49052	-0.437331	1.41028e-05	0.0159752	NA	NA	NA	NA
338	TR411427|c3_g4_i1	nuclear mitotic apparatus 1-like					4.49993	-0.588314	4.30185e-05	0.0281033	NA	NA	NA	NA
1807	TR580157|c2_g2_i1	phosphatase and actin regulator 2-like		GO:0003779,GO:0004864,GO:0008157,GO:0008599,GO:0031532,GO:0043086	actin binding,protein phosphatase inhibitor activity,protein phosphatase 1 binding,protein phosphatase regulator activity,actin cytoskeleton reorganization,negative regulation of catalytic activity	Molecular Function,Molecular Function,Molecular Function,Molecular Function,Biological Process,Biological Process	4.51928	3.42476	8.94376e-05	0.0386344	NA	NA	NA	NA
1062	TR540479|c0_g3_i2	predicted protein					4.60543	-0.781586	9.3835e-05	0.0392782	NA	NA	NA	NA
158	TR390028|c8_g1_i2	rho GTPase-activating 21-like isoform X2					4.67759	-0.0381953	2.57285e-05	0.021409	NA	NA	NA	NA
78	TR381252|c0_g1_i1	receptor-type tyrosine- phosphatase delta-like		GO:0009987,GO:0044699	cellular process,single-organism process	Biological Process,Biological Process	4.70209	-0.366563	5.45934e-05	0.0300846	NA	NA	NA	NA
2114	TR598315|c8_g1_i2	---NA---					4.74612	-0.677241	5.15185e-05	0.0297001	NA	NA	NA	NA
348	TR412475|c1_g1_i1	---NA---					4.88677	0.412009	0.000110301	0.0417935	NA	NA	NA	NA
689	TR521345|c2_g1_i9	zinc metallo ase-disintegrin-like VLAIP-A					4.90481	0.0552836	2.8934e-05	0.0225012	NA	NA	NA	NA
1772	TR577670|c3_g3_i2	DNA helicase	EC:3.6.1,EC:3.6.1.15	GO:0004386,GO:0006259,GO:0051276	helicase activity,DNA metabolic process,chromosome organization	Molecular Function,Biological Process,Biological Process	4.93842	2.17738	7.44097e-06	0.0114661	NA	NA	NA	NA
147	TR387308|c0_g1_i2	PREDICTED: uncharacterized protein LOC101863413, partial					4.98646	-0.172634	0.000106432	0.041775	NA	NA	NA	NA
2282	TR607804|c3_g1_i3	zinc finger 208-like					5.00981	0.71625	3.75713e-05	0.0264945	NA	NA	NA	NA
1479	TR562750|c1_g1_i3	zinc finger PLAG1 isoform X1					5.07047	-0.0551489	8.55302e-06	0.0123426	NA	NA	NA	NA
1788	TR579083|c1_g1_i6	---NA---					5.13758	5.44905	7.95191e-05	0.0366007	NA	NA	NA	NA
2372	TR613448|c0_g1_i10	metallo-beta-lactamase domain-containing 1-like					5.1793	0.257303	1.36122e-05	0.0159533	NA	NA	NA	NA
507	TR440645|c2_g1_i2	kinesin light chain	EC:3.6.1,EC:3.6.1.15	GO:0003777,GO:0005737,GO:0005871,GO:0005874	microtubule motor activity,cytoplasm,kinesin complex,microtubule	Molecular Function,Cellular Component,Cellular Component,Cellular Component	5.19178	0.308431	2.40592e-05	0.020677	NA	NA	NA	NA
536	TR444702|c1_g1_i2	nischarin isoform X7		GO:0005488,GO:0016020	binding,membrane	Molecular Function,Cellular Component	5.30061	1.36847	2.77335e-06	0.00579872	NA	NA	NA	NA
1534	TR565225|c4_g1_i3	E3 ubiquitin- ligase SHPRH		GO:0005488	binding	Molecular Function	5.38317	-0.014767	2.26911e-05	0.0200867	NA	NA	NA	NA
1566	TR567725|c1_g1_i1	vacuolar sorting-associated 13D-like					5.45589	0.678403	4.2771e-05	0.0281033	NA	NA	NA	NA
371	TR419217|c5_g2_i3	RNA-directed DNA polymerase from mobile element jockey- partial					5.47814	2.75849	0.000125246	0.0437711	NA	NA	NA	NA
1936	TR588274|c2_g2_i4	sulfotransferase family cytosolic 1B member 1-like					5.497	0.855722	3.9746e-06	0.00734956	NA	NA	NA	NA
1251	TR551733|c0_g2_i3	---NA---					5.51727	0.620623	0.000117604	0.042921	NA	NA	NA	NA
2231	TR604789|c0_g2_i3	PREDICTED: uncharacterized protein LOC101847518 isoform X1					5.58524	0.658416	3.60013e-05	0.0259196	NA	NA	NA	NA
1952	TR589071|c0_g2_i6	PREDICTED: uncharacterized protein C19orf47 homolog					5.61716	0.489951	1.53206e-06	0.004553	NA	NA	NA	NA
119	TR385183|c17_g1_i1	rhomboid-related 2-like isoform X1					5.62556	1.21851	2.2464e-06	0.00566439	NA	NA	NA	NA
1611	TR569741|c4_g2_i16	polycomb group RING finger 3		GO:0008270	zinc ion binding	Molecular Function	5.64756	1.49319	7.74714e-05	0.0362313	NA	NA	NA	NA
751	TR524132|c2_g3_i1	microtubule-associated futsch-like isoform X11					5.82571	1.93396	8.07032e-05	0.0368978	NA	NA	NA	NA
816	TR527950|c2_g4_i1	---NA---					5.86238	-0.714937	2.29618e-05	0.0201124	NA	NA	NA	NA
1849	TR582555|c0_g1_i2	mitochondrial division 1-like isoform X1					5.91374	-0.657749	0.000111688	0.0420527	NA	NA	NA	NA
821	TR528124|c1_g1_i3	zinc finger 474-like					5.97968	0.154018	9.6477e-05	0.0393527	NA	NA	NA	NA
1946	TR588590|c7_g1_i4	Choline mitochondrial		GO:0008152,GO:0016491	metabolic process,oxidoreductase activity	Biological Process,Molecular Function	6.00773	1.73475	5.93028e-06	0.0100707	NA	NA	NA	NA
1188	TR547331|c1_g1_i1	hypothetical protein LOTGIDRAFT_225148		GO:0005509	calcium ion binding	Molecular Function	6.20736	0.355341	9.45499e-05	0.0392782	NA	NA	NA	NA
1942	TR588463|c0_g4_i1	---NA---					6.3053	-0.834433	5.97873e-05	0.0314871	NA	NA	NA	NA
1714	TR575710|c0_g1_i4	PREDICTED: uncharacterized protein LOC101851458					6.41458	-0.283621	3.36339e-05	0.025002	NA	NA	NA	NA
894	TR531505|c0_g1_i4	mucin-17-like isoform X1					6.56239	-0.682044	9.18632e-05	0.0390002	NA	NA	NA	NA
2180	TR602249|c3_g2_i1	kelch domain-containing 4					6.60447	-0.483764	2.21679e-05	0.0200867	NA	NA	NA	NA
2062	TR594497|c1_g2_i4	---NA---					6.81132	0.225878	7.35586e-05	0.0351379	NA	NA	NA	NA
924	TR533087|c2_g2_i2	PREDICTED: uncharacterized protein LOC101853661 isoform X1					6.82822	-0.203117	1.06424e-06	0.00368985	NA	NA	NA	NA
243	TR401291|c1_g7_i1	PREDICTED: uncharacterized protein LOC101856271					6.85538	-0.593847	3.14782e-06	0.00609147	NA	NA	NA	NA
1110	TR543576|c0_g4_i1	#NAME?					6.99959	-0.404945	5.41835e-05	0.0300577	NA	NA	NA	NA
1302	TR555219|c1_g1_i1	voltage-dependent calcium channel subunit alpha-2 delta-1-like					7.06205	0.0716138	4.55395e-05	0.0282877	NA	NA	NA	NA
132	TR387037|c8_g2_i13	ankyrin repeat domain-containing 50-like		GO:0008168,GO:0032259	methyltransferase activity,methylation	Molecular Function,Biological Process	7.09274	0.072009	1.19477e-06	0.00392639	NA	NA	NA	NA
1838	TR581674|c6_g1_i1	---NA---					7.11663	-0.674038	7.3835e-06	0.0114661	NA	NA	NA	NA
897	TR531587|c2_g1_i1	R3H domain-containing 2 isoform X9					7.17938	0.0417197	1.34007e-05	0.0159298	NA	NA	NA	NA
861	TR530163|c0_g1_i12	PREDICTED: uncharacterized protein C20orf194-like					7.20239	-0.733508	4.78691e-05	0.0286564	NA	NA	NA	NA
1529	TR565105|c3_g2_i1	insulin-degrading enzyme isoform X1	EC:3.4.24	GO:0004222,GO:0005739,GO:0005782,GO:0005829,GO:0008270,GO:0016485,GO:0043171,GO:0051603	metalloendopeptidase activity,mitochondrion,peroxisomal matrix,cytosol,zinc ion binding,protein processing,peptide catabolic process,proteolysis involved in cellular protein catabolic process	Molecular Function,Cellular Component,Cellular Component,Cellular Component,Molecular Function,Biological Process,Biological Process,Biological Process	7.23406	1.91961	8.24669e-09	7.62461e-05	NA	NA	NA	NA
664	TR520401|c5_g1_i15	balbiani ring 3-like					7.41546	-0.197672	4.67285e-05	0.0282877	NA	NA	NA	NA
1765	TR577344|c2_g1_i2	---NA---					7.42457	0.284086	5.31502e-05	0.0297001	NA	NA	NA	NA
726	TR522702|c0_g1_i1	dynein heavy chain axonemal-like	EC:3.6.1,EC:3.6.1.15	GO:0003777,GO:0005509,GO:0005524,GO:0007018,GO:0030286	microtubule motor activity,calcium ion binding,ATP binding,microtubule-based movement,dynein complex	Molecular Function,Molecular Function,Molecular Function,Biological Process,Cellular Component	7.42798	-0.15286	6.81935e-05	0.0335766	NA	NA	NA	NA
1451	TR561563|c2_g3_i2	---NA---					7.47476	-0.0772772	5.58794e-06	0.00968704	NA	NA	NA	NA
511	TR440660|c4_g1_i10	---NA---					7.50474	-0.499671	3.13328e-05	0.0237021	NA	NA	NA	NA
1282	TR554379|c4_g2_i1	PREDICTED: uncharacterized protein LOC101862255					7.51007	1.01131	0.000157359	0.0497872	NA	NA	NA	NA
899	TR531771|c6_g2_i1	---NA---					7.52562	-0.508422	2.5621e-06	0.00576526	NA	NA	NA	NA
2283	TR607817|c0_g1_i1	---NA---					7.58482	0.151748	8.9362e-05	0.0386344	NA	NA	NA	NA
174	TR390766|c1_g1_i4	---NA---					7.66285	-0.114569	5.98918e-08	0.000415305	NA	NA	NA	NA
2127	TR598664|c4_g1_i1	---NA---					7.73373	-0.483239	4.10206e-08	0.000310306	NA	NA	NA	NA
110	TR385140|c4_g2_i3	serum factor response C-like					7.83484	0.475823	1.71676e-06	0.00474839	NA	NA	NA	NA
1206	TR549350|c2_g1_i4	chitin deacetylase isoform A					7.88489	0.547721	0.000133996	0.0449595	NA	NA	NA	NA
656	TR519970|c5_g1_i6	heat shock factor -like		GO:0003677	DNA binding	Molecular Function	8.10724	0.0525216	9.74947e-05	0.0394465	NA	NA	NA	NA
1050	TR539908|c2_g1_i1	dynein heavy chain axonemal-like	EC:3.6.1,EC:3.6.1.15	GO:0003777,GO:0005524,GO:0007018,GO:0030286	microtubule motor activity,ATP binding,microtubule-based movement,dynein complex	Molecular Function,Molecular Function,Biological Process,Cellular Component	8.25378	-0.0359472	0.000153787	0.0490296	NA	NA	NA	NA
697	TR521704|c0_g1_i2	dynein heavy chain axonemal-like	EC:3.6.1,EC:3.6.1.3,EC:3.6.1.15	GO:0003777,GO:0005524,GO:0007018,GO:0016887,GO:0030286	microtubule motor activity,ATP binding,microtubule-based movement,ATPase activity,dynein complex	Molecular Function,Molecular Function,Biological Process,Molecular Function,Cellular Component	8.29278	0.727311	2.78748e-06	0.00579872	NA	NA	NA	NA
1211	TR549605|c1_g1_i1	dual oxidase 2-like isoform X2		GO:0050896	response to stimulus	Biological Process	8.3346	-0.0879166	5.97853e-05	0.0314871	NA	NA	NA	NA
2028	TR591986|c1_g2_i5	microtubule-associated futsch-like					8.45761	0.225654	0.00011646	0.0428796	7.94125	0.225654	0.000248478	0.0223525
1319	TR555444|c1_g1_i8	---NA---					8.47009	0.108725	4.55422e-05	0.0282877	NA	NA	NA	NA
434	TR426159|c2_g1_i3	BAI1-associated 3 isoform X3					8.52814	-0.261979	7.23644e-05	0.0348065	NA	NA	NA	NA
1668	TR572910|c2_g3_i2	lysophosphatidylcholine acyltransferase 2-like isoform X1		GO:0016020,GO:0016740	membrane,transferase activity	Cellular Component,Molecular Function	8.73845	0.768899	3.82778e-05	0.0267658	NA	NA	NA	NA
28	TR187665|c1_g1_i1	60S ribosomal L7		GO:0005840	ribosome	Cellular Component	8.79461	4.29761	4.08576e-06	0.00739088	NA	NA	NA	NA
1985	TR590452|c4_g2_i1	---NA---					8.8293	0.386341	1.10864e-05	0.0140843	NA	NA	NA	NA
1204	TR549241|c2_g1_i6	unconventional myosin-Va-like isoform X6	EC:3.6.1,EC:3.6.1.15	GO:0003774,GO:0005524,GO:0016459	motor activity,ATP binding,myosin complex	Molecular Function,Molecular Function,Cellular Component	9.01011	0.684584	0.00012806	0.0437711	NA	NA	NA	NA
501	TR440592|c0_g1_i3	microtubule-actin cross-linking factor isoforms 1 2 3 5-like isoform X9					9.06241	0.923842	4.36914e-07	0.00191348	NA	NA	NA	NA
1176	TR546326|c1_g2_i15	furry homolog					9.11188	0.657505	8.22872e-05	0.0370285	NA	NA	NA	NA
1402	TR559667|c2_g2_i6	Transmembrane 50B		GO:0016021	integral component of membrane	Cellular Component	9.20067	1.08571	3.48158e-05	0.0254128	NA	NA	NA	NA
813	TR527835|c0_g3_i12	Isocitrate dehydrogenase [NAD] subunit mitochondrial	EC:1.1.1.41,EC:1.1.1	GO:0000287,GO:0004449,GO:0005739,GO:0006099,GO:0051287	magnesium ion binding,isocitrate dehydrogenase (NAD+) activity,mitochondrion,tricarboxylic acid cycle,NAD binding	Molecular Function,Molecular Function,Cellular Component,Biological Process,Molecular Function	9.72296	1.36462	7.93488e-05	0.0366007	NA	NA	NA	NA
1681	TR573703|c1_g1_i1	---NA---					10.6621	2.97993	2.83342e-07	0.00130984	NA	NA	NA	NA
722	TR522493|c1_g1_i5	---NA---					10.7143	1.78757	1.47226e-07	0.000832623	NA	NA	NA	NA
304	TR406851|c1_g1_i4	FAM78A-like isoform X1					12.7697	4.12369	0.00011562	0.0428796	NA	NA	NA	NA
1	TR141988|c0_g1_i1	cadherin EGF LAG seven-pass G-type receptor 1-like isoform X3					NA	NA	NA	NA	5.01387	-0.0191145	2.7802e-05	0.00765599
2	TR143525|c0_g1_i2	---NA---					NA	NA	NA	NA	4.00534	-0.635015	0.00116924	0.0476928
3	TR150803|c0_g1_i1	---NA---					NA	NA	NA	NA	-2.22618	2.46463	4.9509e-05	0.00990312
4	TR152754|c0_g1_i2	---NA---					NA	NA	NA	NA	3.50191	-0.553153	0.00113956	0.0471262
5	TR154530|c0_g1_i2	---NA---					NA	NA	NA	NA	1.51033	4.86773	0.000763109	0.0391728
6	TR155117|c1_g1_i1	---NA---					NA	NA	NA	NA	-1.98751	4.37667	3.09371e-05	0.00792094
7	TR157419|c0_g1_i1	---NA---					NA	NA	NA	NA	4.67874	1.11358	0.000306225	0.0249327
8	TR158851|c0_g1_i1	---NA---					NA	NA	NA	NA	-2.02509	1.04861	0.0011121	0.0466662
9	TR159148|c1_g1_i1	---NA---					NA	NA	NA	NA	-2.40363	2.61623	7.92855e-05	0.0127118
10	TR159148|c1_g1_i2	---NA---					NA	NA	NA	NA	-2.04548	3.54926	0.000808234	0.0403443
11	TR159314|c1_g1_i2	---NA---					NA	NA	NA	NA	-1.85616	1.69241	0.00114758	0.0472263
12	TR159949|c1_g1_i1	---NA---					NA	NA	NA	NA	3.85315	2.03664	1.90937e-07	0.000745172
13	TR163423|c0_g1_i1	Sodium glucose cotransporter 4		GO:0005215,GO:0006259,GO:0016021,GO:0055085	transporter activity,DNA metabolic process,integral component of membrane,transmembrane transport	Molecular Function,Biological Process,Cellular Component,Biological Process	NA	NA	NA	NA	1.77643	1.70803	5.81783e-05	0.0108479
14	TR165446|c0_g1_i1	DEAD DEAH box helicase family	EC:3.6.1,EC:3.6.1.15	GO:0004386,GO:0097159,GO:1901363	helicase activity,organic cyclic compound binding,heterocyclic compound binding	Molecular Function,Molecular Function,Molecular Function	NA	NA	NA	NA	5.75781	1.16565	0.000816171	0.0405701
15	TR165563|c0_g1_i1	cytoplasmic actin partial					NA	NA	NA	NA	3.10873	1.32105	8.20232e-05	0.0129511
16	TR169838|c0_g1_i1	partial					NA	NA	NA	NA	1.55425	2.28264	0.000836652	0.0412189
17	TR171510|c0_g1_i1	twisted gastrulation					NA	NA	NA	NA	1.71788	1.02405	0.000736058	0.0384724
18	TR173246|c1_g1_i1	4-hydroxyphenylpyruvate dioxygenase	EC:1.13.11,EC:3.6.1,EC:4.4.1.5,EC:1.13.11.27,EC:3.6.1.15	GO:0003678,GO:0003868,GO:0004462,GO:0005524,GO:0006260,GO:0009072,GO:0032508,GO:0046872,GO:0055114	DNA helicase activity,4-hydroxyphenylpyruvate dioxygenase activity,lactoylglutathione lyase activity,ATP binding,DNA replication,aromatic amino acid family metabolic process,DNA duplex unwinding,metal ion binding,oxidation-reduction process	Molecular Function,Molecular Function,Molecular Function,Molecular Function,Biological Process,Biological Process,Biological Process,Molecular Function,Biological Process	NA	NA	NA	NA	1.61354	2.56394	0.000262676	0.0229117
19	TR175550|c0_g1_i1	---NA---					NA	NA	NA	NA	3.35713	2.24597	3.06968e-05	0.00788367
20	TR179732|c1_g1_i3	PREDICTED: uncharacterized protein LOC101862385 isoform X1					NA	NA	NA	NA	8.25374	0.0703003	3.66071e-05	0.00859293
21	TR180853|c1_g1_i1	---NA---					NA	NA	NA	NA	-2.16269	1.25928	3.8836e-05	0.00876794
22	TR182813|c0_g1_i1	---NA---					NA	NA	NA	NA	3.43875	3.44756	6.55245e-05	0.0116416
23	TR184512|c0_g1_i1	MYOM_LYMST ame: Full=Myomodulin neuropeptides Contains: ame: Full=GLQMLRL-amide Contains: ame: Full=QIPMLRL-amide Contains: ame: Full=SMSMLRL-amide Contains: ame: Full=SLSMLRL-amide Contains: ame: Full=Myomodulin-A ame: Full=PMSMLRL-amide Flags: Precursor		GO:0005576,GO:0007218	extracellular region,neuropeptide signaling pathway	Cellular Component,Biological Process	NA	NA	NA	NA	1.88046	2.21535	0.000266664	0.0230517
24	TR185591|c0_g1_i1	---NA---					NA	NA	NA	NA	-1.14192	3.88819	0.000702019	0.0373725
25	TR186442|c0_g1_i1	---NA---					NA	NA	NA	NA	-2.30638	1.91672	1.31469e-05	0.00544264
26	TR186820|c0_g1_i1	---NA---					NA	NA	NA	NA	1.75041	4.25727	3.3256e-05	0.00813909
27	TR187609|c0_g1_i4	Tyrosine- kinase Src42A	EC:2.7.10,EC:2.7.10.2	GO:0004715,GO:0005524,GO:0018108	non-membrane spanning protein tyrosine kinase activity,ATP binding,peptidyl-tyrosine phosphorylation	Molecular Function,Molecular Function,Biological Process	NA	NA	NA	NA	1.6706	2.88709	0.000216976	0.021117
29	TR189447|c0_g1_i1	---NA---					NA	NA	NA	NA	-2.62576	0.745718	0.000394764	0.0281598
30	TR190214|c0_g1_i1	---NA---					NA	NA	NA	NA	-2.38248	0.341096	0.000651403	0.0358915
31	TR194456|c0_g1_i1	---NA---					NA	NA	NA	NA	-1.77646	8.59286	0.000197998	0.0202652
32	TR195619|c0_g1_i1	---NA---					NA	NA	NA	NA	2.29771	3.25155	0.000398564	0.0283218
33	TR199630|c0_g1_i2	---NA---					NA	NA	NA	NA	4.42282	0.325112	0.000151372	0.0179684
34	TR206431|c0_g1_i2	predicted protein					NA	NA	NA	NA	3.57715	-0.374945	2.00774e-05	0.0065774
35	TR207716|c2_g1_i1	---NA---					NA	NA	NA	NA	-2.05995	2.54213	0.000166535	0.018832
36	TR213564|c0_g1_i1	myomodulin precursor		GO:0005576,GO:0007218	extracellular region,neuropeptide signaling pathway	Cellular Component,Biological Process	NA	NA	NA	NA	2.73147	4.68111	3.41838e-08	0.000284447
37	TR213978|c0_g1_i1	---NA---					NA	NA	NA	NA	-2.39102	1.38128	2.64563e-05	0.00748794
38	TR215189|c0_g1_i1	---NA---					NA	NA	NA	NA	-1.76001	2.71471	0.000548186	0.0331071
39	TR21982|c0_g1_i1	---NA---					NA	NA	NA	NA	4.37851	2.02877	0.00012405	0.0158088
40	TR379229|c2_g4_i2	ammonium transporter Rh type B-like		GO:0005887,GO:0008519,GO:0015695,GO:0019740,GO:0072488	integral component of plasma membrane,ammonium transmembrane transporter activity,organic cation transport,nitrogen utilization,ammonium transmembrane transport	Cellular Component,Molecular Function,Biological Process,Biological Process,Biological Process	NA	NA	NA	NA	2.22637	1.50586	0.000903644	0.0428207
41	TR379229|c2_g4_i3	ammonium transporter Rh type B-like		GO:0005887,GO:0008519,GO:0015695,GO:0019740,GO:0072488	integral component of plasma membrane,ammonium transmembrane transporter activity,organic cation transport,nitrogen utilization,ammonium transmembrane transport	Cellular Component,Molecular Function,Biological Process,Biological Process,Biological Process	NA	NA	NA	NA	1.19562	3.81064	0.000632266	0.0355456
42	TR379235|c2_g5_i5	---NA---					NA	NA	NA	NA	-5.49092	-0.704375	0.000785488	0.0398297
43	TR379245|c3_g7_i3	---NA---					NA	NA	NA	NA	-2.11843	0.0892887	0.00130036	0.0498638
44	TR379282|c3_g4_i1	myosin heavy chain		GO:0005488,GO:0043232	binding,intracellular non-membrane-bounded organelle	Molecular Function,Cellular Component	NA	NA	NA	NA	2.91735	1.52202	0.000230924	0.021639
45	TR379288|c3_g2_i3	---NA---					NA	NA	NA	NA	4.86061	-1.01083	0.00113742	0.0471262
46	TR379288|c3_g3_i1	peptidase inhibitor 16-like					NA	NA	NA	NA	2.8816	0.560458	0.000197609	0.0202652
47	TR379305|c1_g1_i3	---NA---					NA	NA	NA	NA	-4.6291	0.20225	0.000636671	0.0355982
49	TR379344|c7_g1_i1	pre-mRNA-splicing factor syf2-like		GO:0000398,GO:0000974,GO:0071010,GO:0071012,GO:0071013,GO:0071014	mRNA splicing via spliceosome,Prp19 complex,prespliceosome,catalytic step 1 spliceosome,catalytic step 2 spliceosome,post-mRNA release spliceosomal complex	Biological Process,Cellular Component,Cellular Component,Cellular Component,Cellular Component,Cellular Component	NA	NA	NA	NA	11.0597	3.55562	6.4955e-15	5.40497e-10
50	TR379345|c4_g1_i1	---NA---					NA	NA	NA	NA	2.5329	2.2966	6.57659e-05	0.0116435
51	TR379349|c3_g2_i1	---NA---					NA	NA	NA	NA	-4.32881	-0.777272	0.000208675	0.0206715
52	TR379379|c7_g1_i5	---NA---					NA	NA	NA	NA	-2.66024	1.9133	0.000506881	0.0319042
53	TR379381|c1_g1_i1	---NA---					NA	NA	NA	NA	3.92793	-0.821283	0.000592181	0.0344419
54	TR379382|c1_g1_i1	twitchin-like isoform X13					NA	NA	NA	NA	2.25933	4.6602	8.22078e-06	0.00451854
55	TR379391|c7_g1_i3	NF-kappa-B inhibitor cactus-like					NA	NA	NA	NA	2.09258	1.89774	0.000733071	0.0384076
56	TR379393|c7_g1_i4	---NA---					NA	NA	NA	NA	-6.09756	-0.453362	6.92099e-06	0.00409031
57	TR379541|c1_g1_i6	dual specificity phosphatase CDC14A-like	EC:3.1.3.16,EC:3.1,EC:3.1.3.48,EC:3.1.3.41,EC:3.1.3	GO:0004725,GO:0008138,GO:0035335	protein tyrosine phosphatase activity,protein tyrosine/serine/threonine phosphatase activity,peptidyl-tyrosine dephosphorylation	Molecular Function,Molecular Function,Biological Process	NA	NA	NA	NA	-1.24625	7.01509	3.41576e-05	0.00826246
58	TR379588|c1_g1_i1	Rh type B glyco		GO:0005887,GO:0008519,GO:0015695,GO:0019740,GO:0072488	integral component of plasma membrane,ammonium transmembrane transporter activity,organic cation transport,nitrogen utilization,ammonium transmembrane transport	Cellular Component,Molecular Function,Biological Process,Biological Process,Biological Process	NA	NA	NA	NA	3.30794	-0.10594	7.11557e-05	0.011873
59	TR379588|c1_g1_i2	ammonium transporter Rh type A-like		GO:0015696,GO:0016020	ammonium transport,membrane	Biological Process,Cellular Component	NA	NA	NA	NA	2.04427	1.26233	5.48713e-05	0.0104963
60	TR379627|c0_g1_i3	LON peptidase N-terminal domain and RING finger partial		GO:0046872	metal ion binding	Molecular Function	NA	NA	NA	NA	-4.23358	1.41471	0.000205438	0.0204727
61	TR379635|c4_g5_i1	---NA---					NA	NA	NA	NA	1.84718	0.985062	0.000588419	0.0344083
62	TR379651|c0_g1_i2	thioester-containing					NA	NA	NA	NA	2.2996	1.24681	0.00108017	0.0461651
64	TR379792|c1_g2_i1	PREDICTED: dihydropyrimidine dehydrogenase [NADP(+)]-like		GO:0016491,GO:0044710	oxidoreductase activity,single-organism metabolic process	Molecular Function,Biological Process	NA	NA	NA	NA	1.11073	5.57211	0.000342746	0.0263345
65	TR379804|c2_g1_i1	---NA---					NA	NA	NA	NA	-1.5323	0.955712	0.000921731	0.0433298
66	TR379805|c0_g1_i3	cathepsin L1-like isoform X1		GO:0016787	hydrolase activity	Molecular Function	NA	NA	NA	NA	2.37488	5.6993	7.1391e-08	0.000396035
67	TR379813|c4_g2_i1	PREDICTED: uncharacterized protein LOC101851743					NA	NA	NA	NA	2.17075	2.47099	5.10082e-05	0.0101542
69	TR379864|c5_g1_i5	PREDICTED: la-related protein 1-like isoform X4					NA	NA	NA	NA	-11.0638	4.30284	8.21331e-08	0.000427149
70	TR379867|c2_g1_i1	---NA---					NA	NA	NA	NA	2.20913	1.04552	0.000387497	0.0279169
71	TR379870|c1_g6_i1	---NA---					NA	NA	NA	NA	-2.27635	1.9912	0.000257486	0.0226809
72	TR379870|c1_g7_i1	---NA---					NA	NA	NA	NA	-2.33668	1.14584	0.000170271	0.0189557
73	TR381196|c1_g1_i1	PREDICTED: uncharacterized protein LOC101854311					NA	NA	NA	NA	2.67703	-0.265527	0.000210552	0.020734
74	TR381204|c3_g3_i4	---NA---					NA	NA	NA	NA	2.78122	0.459056	0.000632125	0.0355456
75	TR381215|c4_g1_i1	---NA---					NA	NA	NA	NA	-8.30363	-0.160465	0.000350326	0.0265834
76	TR381220|c1_g2_i12	Serine threonine- kinase H1	EC:2.7.11	GO:0004674,GO:0005524,GO:0006468,GO:0007275	protein serine/threonine kinase activity,ATP binding,protein phosphorylation,multicellular organism development	Molecular Function,Molecular Function,Biological Process,Biological Process	NA	NA	NA	NA	5.50629	0.353176	0.00025675	0.0226809
77	TR381235|c0_g1_i4	PREDICTED: uncharacterized protein LOC101857839 isoform X1					NA	NA	NA	NA	8.09751	0.0595152	0.000461776	0.0305316
79	TR381253|c1_g3_i1	---NA---					NA	NA	NA	NA	2.61034	-0.648251	0.000531672	0.0326436
80	TR381269|c1_g4_i1	PREDICTED: uncharacterized protein LOC101855431					NA	NA	NA	NA	6.98165	0.11873	0.000527913	0.0326002
81	TR381280|c0_g3_i1	dual 3 ,5 -cyclic-AMP and -GMP phosphodiesterase 11 isoform X3	EC:3.1.4,EC:3.1.4.17,EC:3.1	GO:0004114,GO:0007165,GO:0046872	3'5'-cyclic-nucleotide phosphodiesterase activity,signal transduction,metal ion binding	Molecular Function,Biological Process,Molecular Function	NA	NA	NA	NA	2.08961	1.7539	0.000102317	0.0142335
82	TR382253|c0_g2_i3	---NA---					NA	NA	NA	NA	2.5383	-0.899288	0.00118457	0.0479424
83	TR382259|c5_g7_i1	---NA---					NA	NA	NA	NA	-2.24661	0.899575	0.000150545	0.0179213
84	TR382306|c1_g2_i1	multidrug resistance 1A-like	EC:3.6.1,EC:3.6.1.3,EC:3.6.1.15	GO:0000166,GO:0006810,GO:0016020,GO:0016887,GO:0044699	nucleotide binding,transport,membrane,ATPase activity,single-organism process	Molecular Function,Biological Process,Cellular Component,Molecular Function,Biological Process	NA	NA	NA	NA	-1.70129	3.21062	0.000549059	0.0331071
85	TR382313|c7_g1_i2	hypothetical protein LOTGIDRAFT_232674		GO:0003676,GO:0005622,GO:0006886,GO:0008536,GO:0016021,GO:0046872	nucleic acid binding,intracellular,intracellular protein transport,Ran GTPase binding,integral component of membrane,metal ion binding	Molecular Function,Cellular Component,Biological Process,Molecular Function,Cellular Component,Molecular Function	NA	NA	NA	NA	5.39031	-0.376592	0.000902213	0.0428016
86	TR382338|c5_g6_i1	---NA---					NA	NA	NA	NA	-1.55171	3.37026	0.000543348	0.0330501
87	TR382341|c1_g2_i4	ribosome-binding 1-like isoform X3					NA	NA	NA	NA	6.25551	-1.12257	0.000502325	0.0318105
88	TR382352|c3_g2_i3	PREDICTED: uncharacterized protein LOC101853628 isoform X1					NA	NA	NA	NA	2.21573	1.32718	0.000465934	0.0306489
91	TR383985|c11_g1_i2	---NA---					NA	NA	NA	NA	-1.59828	7.43886	0.000363086	0.026953
92	TR383987|c6_g1_i1	choline transporter 2 isoform X3					NA	NA	NA	NA	2.07334	3.23563	0.000123998	0.0158088
93	TR383998|c1_g1_i1	---NA---					NA	NA	NA	NA	-1.51342	4.57452	0.000877736	0.0421676
95	TR384008|c4_g2_i4	---NA---					NA	NA	NA	NA	2.14582	4.36823	0.000595663	0.0344925
96	TR384015|c4_g2_i1	---NA---					NA	NA	NA	NA	2.42759	1.07077	0.00101435	0.0449868
97	TR384040|c1_g1_i3	alpha-tubulin N-acetyltransferase 1-like	EC:2.3.1.108,EC:2.3.1.32,EC:2.3.1	GO:0004468,GO:0005794,GO:0005829,GO:0005874,GO:0006996,GO:0019799,GO:0032501,GO:0044699,GO:0050662,GO:0051128,GO:0071929,GO:0072686	lysine N-acetyltransferase activity acting on acetyl phosphate as donor,Golgi apparatus,cytosol,microtubule,organelle organization,tubulin N-acetyltransferase activity,multicellular organismal process,single-organism process,coenzyme binding,regulation of cellular component organization,alpha-tubulin acetylation,mitotic spindle	Molecular Function,Cellular Component,Cellular Component,Cellular Component,Biological Process,Molecular Function,Biological Process,Biological Process,Molecular Function,Biological Process,Biological Process,Cellular Component	NA	NA	NA	NA	-8.02075	0.0448642	0.00119026	0.0480789
98	TR384042|c0_g2_i1	complement component C3					NA	NA	NA	NA	1.42058	4.59351	3.71689e-05	0.0085944
99	TR384048|c1_g1_i2	centrosomal of 97 kDa		GO:0005737,GO:0005813,GO:0043234,GO:1901673,GO:1902018	cytoplasm,centrosome,protein complex,regulation of mitotic spindle assembly,negative regulation of cilium assembly	Cellular Component,Cellular Component,Cellular Component,Biological Process,Biological Process	NA	NA	NA	NA	-2.01313	1.9991	0.00124153	0.0491011
100	TR385117|c1_g1_i2	myosin heavy chain	EC:3.6.1,EC:3.6.1.15	GO:0003774,GO:0005524,GO:0016459,GO:0051015	motor activity,ATP binding,myosin complex,actin filament binding	Molecular Function,Molecular Function,Cellular Component,Molecular Function	NA	NA	NA	NA	4.30795	1.00803	0.000853672	0.0416612
101	TR385117|c2_g2_i1	myosin heavy chain isoform partial	EC:3.6.1,EC:3.6.1.15	GO:0003774,GO:0003779,GO:0005524,GO:0016459	motor activity,actin binding,ATP binding,myosin complex	Molecular Function,Molecular Function,Molecular Function,Cellular Component	NA	NA	NA	NA	3.97731	0.00795492	0.000193473	0.0202504
102	TR385117|c3_g1_i1	myosin heavy chain isoform A		GO:0000166	nucleotide binding	Molecular Function	NA	NA	NA	NA	3.83942	0.666356	0.000502037	0.0318105
103	TR385117|c3_g2_i3	myosin heavy chain isoform A	EC:3.6.1,EC:3.6.1.15	GO:0003774,GO:0003779,GO:0005524,GO:0016459	motor activity,actin binding,ATP binding,myosin complex	Molecular Function,Molecular Function,Molecular Function,Cellular Component	NA	NA	NA	NA	3.82419	0.0497873	0.000863141	0.0418981
104	TR385117|c3_g2_i4	myosin heavy chain isoform A	EC:3.6.1,EC:3.6.1.15	GO:0003774,GO:0003779,GO:0005524,GO:0016459	motor activity,actin binding,ATP binding,myosin complex	Molecular Function,Molecular Function,Molecular Function,Cellular Component	NA	NA	NA	NA	4.03789	0.238865	0.000526474	0.0325714
105	TR385117|c4_g4_i1	myosin heavy chain	EC:3.6.1,EC:3.6.1.15	GO:0003774,GO:0003779,GO:0005524,GO:0005737,GO:0016459	motor activity,actin binding,ATP binding,cytoplasm,myosin complex	Molecular Function,Molecular Function,Molecular Function,Cellular Component,Cellular Component	NA	NA	NA	NA	4.56148	0.479536	0.000803279	0.0403103
106	TR385127|c1_g1_i2	von Willebrand factor type EGF and pentraxin domain-containing 1					NA	NA	NA	NA	1.81485	2.73561	7.6281e-05	0.0123648
107	TR385130|c2_g1_i2	band 7 AAEL010189-like isoform X5		GO:0016021	integral component of membrane	Cellular Component	NA	NA	NA	NA	1.75906	2.0617	0.00067538	0.0365879
108	TR385134|c2_g2_i2	basement membrane-specific heparan sulfate proteoglycan core -like					NA	NA	NA	NA	3.11257	3.71146	1.06168e-07	0.000519665
109	TR385139|c7_g1_i1	---NA---					NA	NA	NA	NA	-1.70417	4.07335	0.00105092	0.0455182
111	TR385143|c3_g1_i1	fatty acid partial	EC:2.3.1.85,EC:3.1.2.14	GO:0016297	acyl-[acyl-carrier-protein] hydrolase activity	Molecular Function	NA	NA	NA	NA	5.09391	1.74623	0.000523861	0.0324422
112	TR385148|c4_g1_i2	---NA---					NA	NA	NA	NA	-1.52283	6.39736	0.000820307	0.0407184
113	TR385155|c0_g1_i9	---NA---					NA	NA	NA	NA	7.23045	0.0669814	0.000490489	0.0314003
114	TR385161|c5_g2_i1	PREDICTED: uncharacterized protein LOC101847826 isoform X2					NA	NA	NA	NA	2.19035	1.56077	3.05587e-05	0.00787733
115	TR385164|c2_g1_i1	reversion-inducing cysteine-rich with Kazal motifs-like		GO:0001568,GO:0002376,GO:0004866,GO:0009653,GO:0009966,GO:0010466,GO:0030334,GO:0048513	blood vessel development,immune system process,endopeptidase inhibitor activity,anatomical structure morphogenesis,regulation of signal transduction,negative regulation of peptidase activity,regulation of cell migration,animal organ development	Biological Process,Biological Process,Molecular Function,Biological Process,Biological Process,Biological Process,Biological Process,Biological Process	NA	NA	NA	NA	2.25234	0.384302	0.00100254	0.0447547
116	TR385172|c2_g5_i1	---NA---					NA	NA	NA	NA	-3.14692	3.02949	0.000932492	0.0435185
117	TR385172|c4_g1_i2	---NA---					NA	NA	NA	NA	2.11124	2.65435	9.17772e-05	0.0136509
118	TR385177|c4_g1_i1	---NA---					NA	NA	NA	NA	4.59059	0.00613871	2.19503e-05	0.00689247
120	TR385209|c3_g1_i2	rho GTPase-activating 7-like isoform X4					NA	NA	NA	NA	9.54692	1.65284	0.000635336	0.0355527
121	TR385547|c2_g2_i1	vesicular acetylcholine transporter		GO:0006855,GO:0015238,GO:0016021	drug transmembrane transport,drug transmembrane transporter activity,integral component of membrane	Biological Process,Molecular Function,Cellular Component	NA	NA	NA	NA	2.74124	0.601652	5.84043e-05	0.0108479
122	TR385554|c1_g1_i1	sodium- and chloride-dependent creatine transporter 1-like		GO:0006810	transport	Biological Process	NA	NA	NA	NA	2.44051	1.2619	0.000363451	0.026953
123	TR385593|c1_g2_i4	---NA---					NA	NA	NA	NA	-3.74827	0.303243	0.000952802	0.0439244
124	TR385601|c6_g1_i1	prolyl 4-hydroxylase subunit alpha-2 isoform X1					NA	NA	NA	NA	2.1963	4.26418	0.000424242	0.029369
125	TR385601|c6_g1_i2	prolyl 4-hydroxylase subunit alpha-2-like					NA	NA	NA	NA	3.96261	0.942516	0.000601442	0.0346799
126	TR386582|c0_g1_i3	UPF0378 KIAA0100					NA	NA	NA	NA	3.17897	2.30997	0.00111198	0.0466662
127	TR386601|c1_g1_i2	---NA---					NA	NA	NA	NA	8.06395	0.226378	0.00126215	0.0494933
130	TR386645|c2_g2_i2	---NA---					NA	NA	NA	NA	-2.60973	0.642352	0.00115267	0.0473201
131	TR387034|c0_g1_i6	NCAM-related adhesion molecule					NA	NA	NA	NA	4.77439	0.106303	0.000529616	0.0326316
133	TR387065|c4_g2_i2	PREDICTED: contactin-3-like					NA	NA	NA	NA	4.19418	-0.535247	0.00110795	0.0466332
134	TR387085|c0_g2_i1	insulin-like growth factor-binding complex acid labile subunit isoform X2					NA	NA	NA	NA	6.78695	-1.14931	0.000707267	0.0375334
135	TR387086|c1_g1_i2	BTB POZ domain-containing KCTD1 isoform X1					NA	NA	NA	NA	-8.14397	0.172763	5.26248e-06	0.00356013
137	TR387112|c1_g1_i5	solute carrier family 25 member 38-like isoform X2		GO:0005739,GO:0006810,GO:0016020	mitochondrion,transport,membrane	Cellular Component,Biological Process,Cellular Component	NA	NA	NA	NA	2.74309	3.40442	1.4889e-06	0.00211929
139	TR387217|c1_g3_i1	microtubule-associated futsch-like isoform X1		GO:0005198,GO:0005882	structural molecule activity,intermediate filament	Molecular Function,Cellular Component	NA	NA	NA	NA	2.25023	0.879673	0.000117628	0.0154627
140	TR387241|c1_g3_i1	PREDICTED: uncharacterized protein LOC101852515					NA	NA	NA	NA	2.06505	2.62282	0.000160187	0.0185387
141	TR387255|c2_g4_i1	---NA---					NA	NA	NA	NA	-1.7797	2.90869	0.000233407	0.0216777
142	TR387256|c4_g1_i1	solute carrier family 28 member 3-like		GO:0006810,GO:0016020	transport,membrane	Biological Process,Cellular Component	NA	NA	NA	NA	1.95027	1.70585	2.07145e-05	0.00670691
144	TR387274|c4_g1_i2	complement C1q 3					NA	NA	NA	NA	2.27093	6.77989	6.86646e-05	0.0118134
145	TR387289|c2_g1_i2	Testican- partial					NA	NA	NA	NA	1.66947	5.30525	0.000166569	0.018832
146	TR387290|c4_g2_i1	---NA---					NA	NA	NA	NA	-1.28778	6.28192	0.000146016	0.0175326
149	TR389954|c17_g1_i1	collagen alpha-1(XI) chain-like					NA	NA	NA	NA	2.9248	3.78943	8.55013e-06	0.00453162
150	TR389954|c17_g2_i1	collagen alpha-1					NA	NA	NA	NA	3.55393	3.96182	1.66404e-06	0.00218913
151	TR389971|c1_g1_i1	fibrillin-2-like isoform X2					NA	NA	NA	NA	3.30497	1.22482	0.000415385	0.0289276
152	TR389976|c13_g7_i2	---NA---					NA	NA	NA	NA	-1.98448	2.98494	0.000255802	0.0226809
153	TR390003|c27_g2_i1	RNA-directed DNA polymerase from mobile element partial					NA	NA	NA	NA	-1.32823	5.43623	0.000517797	0.0323488
154	TR390007|c18_g1_i1	---NA---					NA	NA	NA	NA	-1.79055	5.70334	7.17848e-05	0.0119017
156	TR390009|c5_g1_i8	RNA-directed DNA polymerase from mobile element jockey-like					NA	NA	NA	NA	-4.41668	1.15251	1.44462e-05	0.00553954
157	TR390027|c8_g1_i1	myomodulin neuropeptides 1-like					NA	NA	NA	NA	2.7615	1.47233	1.14184e-05	0.00514965
159	TR390310|c0_g1_i1	uncharacterized F-box LRR-repeat -like isoform X1					NA	NA	NA	NA	3.566	-0.378391	0.000187619	0.0199899
160	TR390317|c0_g5_i1	prolow-density lipo receptor-related 1					NA	NA	NA	NA	1.57984	4.10608	0.00129212	0.0497963
161	TR390317|c0_g5_i3	---NA---					NA	NA	NA	NA	1.88233	2.6319	0.000824165	0.0408145
162	TR390330|c1_g1_i1	PREDICTED: 3-beta-hydroxysteroid-Delta(8),Delta(7)-isomerase-like		GO:0044699	single-organism process	Biological Process	NA	NA	NA	NA	5.08246	0.434982	0.000365599	0.0270032
164	TR390360|c5_g1_i1	---NA---					NA	NA	NA	NA	-2.61583	2.06078	4.47451e-06	0.00335474
165	TR390360|c5_g1_i2	---NA---					NA	NA	NA	NA	-2.01285	3.73133	0.000737259	0.0384921
166	TR390366|c1_g4_i1	polycystic kidney disease 1-like 2					NA	NA	NA	NA	-5.31078	-0.465216	0.000810127	0.0403516
167	TR390370|c0_g1_i1	netrin receptor UNC5C					NA	NA	NA	NA	1.73389	4.64855	0.000281807	0.0237936
168	TR390379|c0_g1_i1	PREDICTED: uncharacterized protein LOC101848577					NA	NA	NA	NA	5.47261	6.32016	2.17451e-06	0.00251311
169	TR390379|c0_g2_i1	c-binding -like					NA	NA	NA	NA	4.74923	6.5421	3.55102e-06	0.00301514
170	TR390379|c0_g3_i1	multiple EGF and TSP domain-containing					NA	NA	NA	NA	2.82753	9.85994	8.80603e-05	0.0133887
171	TR390723|c1_g1_i1	---NA---					NA	NA	NA	NA	2.74618	-0.537544	0.000617672	0.0351313
172	TR390741|c1_g5_i2	MACPF domain containing					NA	NA	NA	NA	1.72308	2.07167	0.00109719	0.0464384
173	TR390760|c0_g3_i4	---NA---					NA	NA	NA	NA	-2.68917	0.186343	1.38783e-05	0.00550004
175	TR390779|c1_g1_i1	heparan sulfate glucosamine 3-O-sulfotransferase 5-like		GO:0016020,GO:0016740	membrane,transferase activity	Cellular Component,Molecular Function	NA	NA	NA	NA	1.96364	1.12014	0.000622576	0.0352416
176	TR390780|c0_g1_i3	GTP-binding SAR1b-like isoform X1		GO:0005525,GO:0005783,GO:0005794,GO:0006886,GO:0016192	GTP binding,endoplasmic reticulum,Golgi apparatus,intracellular protein transport,vesicle-mediated transport	Molecular Function,Cellular Component,Cellular Component,Biological Process,Biological Process	NA	NA	NA	NA	2.0254	3.01729	0.000129357	0.0162352
177	TR390797|c1_g3_i3	retinitis pigmentosa 1-like 1 -like					NA	NA	NA	NA	3.90113	-0.743185	0.00101082	0.0449313
178	TR390806|c2_g1_i1	---NA---					NA	NA	NA	NA	-1.51663	3.85547	0.000258505	0.0226809
179	TR391562|c6_g1_i1	transmembrane protease serine 13					NA	NA	NA	NA	-1.86235	3.13274	0.000241359	0.0220943
180	TR391568|c3_g4_i1	---NA---					NA	NA	NA	NA	6.82781	-0.49837	1.67288e-05	0.00613226
181	TR391573|c0_g2_i2	microtubule-associated futsch-like					NA	NA	NA	NA	5.46162	2.51032	0.000513007	0.0321445
182	TR391577|c2_g2_i1	---NA---					NA	NA	NA	NA	1.71603	2.58687	4.32193e-05	0.00931218
183	TR391595|c6_g2_i2	otoancorin isoform X2					NA	NA	NA	NA	4.30071	0.67917	0.000531958	0.0326436
184	TR391595|c6_g3_i1	---NA---					NA	NA	NA	NA	3.00428	0.209125	0.000287236	0.024094
185	TR391608|c6_g1_i2	low-density lipo receptor-related 2-like					NA	NA	NA	NA	-1.73302	4.07457	0.000629529	0.0354903
187	TR391615|c2_g1_i1	homeobox Meis1-like					NA	NA	NA	NA	2.69786	0.820931	3.01582e-05	0.00786674
188	TR391617|c2_g1_i2	---NA---					NA	NA	NA	NA	-2.15902	6.5748	0.000473325	0.0309637
189	TR391623|c1_g1_i2	kinesin KIF13B isoform X1		GO:0000166,GO:0007018	nucleotide binding,microtubule-based movement	Molecular Function,Biological Process	NA	NA	NA	NA	2.25059	0.859382	0.00115582	0.0473516
190	TR391632|c3_g1_i8	---NA---					NA	NA	NA	NA	-1.84807	2.55292	0.00040578	0.0286879
191	TR391636|c2_g1_i1	golgin subfamily B member 1-like					NA	NA	NA	NA	2.21121	4.8244	2.04847e-05	0.0066584
192	TR391759|c2_g2_i1	immunoglobulin superfamily member 10-like					NA	NA	NA	NA	1.43561	2.28491	0.000196099	0.0202652
193	TR391759|c2_g7_i1	leucine-rich repeat-containing 15-like					NA	NA	NA	NA	2.9937	1.13001	3.93543e-06	0.0031261
194	TR391763|c0_g1_i1	Aminopeptidase N					NA	NA	NA	NA	2.12964	-0.0971374	0.000208125	0.0206415
195	TR391783|c0_g1_i11	septin-7-like isoform X1		GO:0005525,GO:0031105	GTP binding,septin complex	Molecular Function,Cellular Component	NA	NA	NA	NA	-7.80932	0.0435103	2.11884e-05	0.0067812
196	TR391825|c1_g1_i1	---NA---					NA	NA	NA	NA	-1.48478	2.33124	0.00120959	0.0483396
197	TR392820|c2_g1_i6	PREDICTED: uncharacterized protein LOC101848820 isoform X1					NA	NA	NA	NA	-7.35725	-0.441874	0.00065192	0.0358915
198	TR392855|c4_g3_i4	calponin					NA	NA	NA	NA	4.01633	2.31827	4.63634e-06	0.00335474
199	TR392855|c4_g4_i1	---NA---					NA	NA	NA	NA	1.96298	1.42183	0.000520227	0.032392
200	TR392879|c1_g2_i3	CD109 antigen-like isoform X5		GO:0005576	extracellular region	Cellular Component	NA	NA	NA	NA	1.63407	3.67763	0.000807315	0.0403443
201	TR393587|c1_g1_i3	---NA---					NA	NA	NA	NA	-6.64344	0.932759	5.87656e-05	0.0108907
202	TR393587|c1_g1_i4	---NA---					NA	NA	NA	NA	9.39647	0.62975	0.000222401	0.0212959
203	TR393588|c1_g1_i3	ATP-binding cassette sub-family A member 5-like isoform X2		GO:0006810	transport	Biological Process	NA	NA	NA	NA	-4.69998	0.581024	4.36682e-05	0.00931218
204	TR393591|c1_g3_i7	solute carrier family 12 member 4 isoform X3		GO:0005887,GO:0015379,GO:0071477,GO:1902476	integral component of plasma membrane,potassium:chloride symporter activity,cellular hypotonic salinity response,chloride transmembrane transport	Cellular Component,Molecular Function,Biological Process,Biological Process	NA	NA	NA	NA	7.33807	-0.0783256	4.21445e-09	8.78934e-05
205	TR393596|c0_g1_i1	CAP-Gly domain-containing linker 1					NA	NA	NA	NA	2.32955	0.0278594	0.00115876	0.0474047
206	TR393603|c1_g1_i1	PREDICTED: integrin beta-2-like					NA	NA	NA	NA	1.93086	1.71771	0.000361355	0.0269192
208	TR393644|c2_g5_i1	acidic mammalian chitinase-like		GO:0008152,GO:0016787	metabolic process,hydrolase activity	Biological Process,Molecular Function	NA	NA	NA	NA	1.5924	3.94218	3.35013e-05	0.008175
209	TR393653|c8_g3_i1	C1q domain containing 1q79					NA	NA	NA	NA	2.23227	1.47849	0.000258279	0.0226809
210	TR394923|c2_g1_i1	PREDICTED: uncharacterized protein LOC101860199					NA	NA	NA	NA	1.78809	1.23707	0.000251294	0.0225328
211	TR394954|c0_g1_i2	Peptidylglycine alpha-hydroxylating monooxygenase		GO:0003824	catalytic activity	Molecular Function	NA	NA	NA	NA	2.94206	3.30476	7.0259e-07	0.00132871
212	TR394955|c2_g6_i1	legumain isoform X1		GO:0006508,GO:0008233,GO:0009611,GO:0031099	proteolysis,peptidase activity,response to wounding,regeneration	Biological Process,Molecular Function,Biological Process,Biological Process	NA	NA	NA	NA	1.95959	1.49823	0.000492614	0.0314347
213	TR394960|c1_g1_i2	sel-1 homolog 3					NA	NA	NA	NA	1.95975	3.74414	0.000412929	0.0288727
214	TR394969|c0_g1_i2	PREDICTED: titin-like					NA	NA	NA	NA	1.54316	3.17006	0.000200536	0.0203181
215	TR394970|c1_g5_i2	ras suppressor 1-like isoform X1					NA	NA	NA	NA	2.15096	1.96681	2.59879e-06	0.00273732
216	TR394974|c2_g1_i1	hydrolethalus syndrome 1 homolog					NA	NA	NA	NA	-2.04598	4.78957	8.97779e-05	0.0135259
217	TR394977|c0_g1_i1	---NA---					NA	NA	NA	NA	-2.53495	-0.310205	0.00111114	0.0466662
218	TR394988|c0_g1_i2	Immunoglobulin I-set domain containing partial		GO:0005488,GO:0030239,GO:0043232,GO:0044422,GO:0048738	binding,myofibril assembly,intracellular non-membrane-bounded organelle,organelle part,cardiac muscle tissue development	Molecular Function,Biological Process,Cellular Component,Cellular Component,Biological Process	NA	NA	NA	NA	3.79353	-0.0847685	0.0012861	0.0497963
219	TR394988|c0_g1_i3	muscle M-line assembly unc-89-like					NA	NA	NA	NA	9.54877	0.602722	0.000142548	0.0173162
220	TR395784|c3_g1_i2	NFX1-type zinc finger-containing 1-like					NA	NA	NA	NA	1.7931	2.00719	0.00091776	0.0432434
221	TR395802|c13_g2_i8	---NA---					NA	NA	NA	NA	-1.89731	2.42826	0.000428936	0.0294374
222	TR395848|c4_g2_i1	---NA---					NA	NA	NA	NA	-2.03909	0.25543	0.000965315	0.0441103
224	TR395858|c0_g2_i1	zonadhesin-like isoform X3					NA	NA	NA	NA	5.7248	4.16328	1.10906e-06	0.00177473
225	TR395860|c4_g1_i1	---NA---					NA	NA	NA	NA	3.95817	-0.25707	0.000321067	0.0254683
226	TR395876|c4_g1_i1	F-box LRR-repeat 7-like isoform X6					NA	NA	NA	NA	8.35381	1.19633	1.11695e-05	0.00507881
227	TR395966|c0_g1_i1	---NA---					NA	NA	NA	NA	2.27856	2.80641	3.37952e-05	0.00822261
228	TR395970|c5_g2_i5	---NA---					NA	NA	NA	NA	2.86036	0.224623	0.000465547	0.0306476
229	TR395985|c1_g2_i10	calponin					NA	NA	NA	NA	2.16492	2.20613	0.000327019	0.0257685
230	TR395994|c2_g1_i3	coiled-coil domain-containing 62 isoform X1					NA	NA	NA	NA	8.94402	3.61294	0.000871227	0.042096
232	TR396015|c1_g1_i1	diacylglycerol O-acyltransferase Rv2484c partial	EC:2.3.1	GO:0008374	O-acyltransferase activity	Molecular Function	NA	NA	NA	NA	4.67538	-0.153197	9.01135e-05	0.0135351
233	TR396027|c0_g1_i1	PREDICTED: uncharacterized protein LOC101849567					NA	NA	NA	NA	5.13915	-0.448338	0.000949754	0.0438992
234	TR396043|c0_g1_i2	Lysosomal NCU-G1					NA	NA	NA	NA	2.21142	2.262	0.000637047	0.0355982
235	TR398706|c2_g3_i5	tropomyosin-2-like isoform X2					NA	NA	NA	NA	3.33122	3.09774	1.42714e-05	0.00550004
237	TR398738|c0_g2_i1	muscle-specific 20-like					NA	NA	NA	NA	1.41072	3.13578	0.000263578	0.0229661
238	TR398749|c2_g3_i8	neural proliferation differentiation and control 1-like		GO:0016020	membrane	Cellular Component	NA	NA	NA	NA	4.71788	2.26069	0.00035311	0.0266388
239	TR398756|c2_g1_i1	SH3 and multiple ankyrin repeat domains 3-like isoform X4		GO:0036269,GO:0048854	swimming behavior,brain morphogenesis	Biological Process,Biological Process	NA	NA	NA	NA	3.11292	1.78918	6.0449e-05	0.0110567
240	TR398768|c2_g1_i2	signal peptide peptidase-like 3	EC:3.4.23	GO:0004190,GO:0006508,GO:0016021	aspartic-type endopeptidase activity,proteolysis,integral component of membrane	Molecular Function,Biological Process,Cellular Component	NA	NA	NA	NA	2.0011	1.52341	0.000293475	0.0245431
241	TR401257|c1_g1_i1	PREDICTED: uncharacterized protein LOC101859607					NA	NA	NA	NA	1.43856	3.4701	0.000894375	0.0426486
244	TR401331|c1_g2_i1	---NA---					NA	NA	NA	NA	-1.50779	7.53965	0.000633166	0.0355456
245	TR401331|c1_g4_i1	---NA---					NA	NA	NA	NA	-1.7388	3.93776	0.000626866	0.0354416
246	TR401361|c0_g1_i1	Polycystic kidney disease 1-like 2		GO:0016021	integral component of membrane	Cellular Component	NA	NA	NA	NA	3.91001	0.67072	6.61808e-05	0.0116673
247	TR401368|c2_g1_i2	one cut domain family member 2-like isoform X1					NA	NA	NA	NA	6.43414	2.87823	2.39038e-06	0.00261718
248	TR401370|c0_g1_i1	---NA---					NA	NA	NA	NA	-1.25642	2.51918	0.00126104	0.0494729
250	TR401375|c0_g1_i1	titin-like isoform X3		GO:0016740	transferase activity	Molecular Function	NA	NA	NA	NA	1.8833	4.09924	3.80465e-05	0.00874555
251	TR401389|c1_g1_i1	kinase D interacting substrate of 220 kDa					NA	NA	NA	NA	-1.6997	3.37415	0.000106534	0.0144948
252	TR401417|c8_g1_i2	---NA---					NA	NA	NA	NA	-2.58025	0.399793	0.00123248	0.0488934
253	TR401859|c0_g2_i4	epidermal growth factor receptor kinase substrate 8-like					NA	NA	NA	NA	5.71227	-0.444232	1.29562e-05	0.00539048
254	TR401863|c0_g1_i2	---NA---					NA	NA	NA	NA	-7.90756	0.141119	0.000304298	0.0248501
255	TR401868|c12_g1_i2	---NA---					NA	NA	NA	NA	-8.03442	1.02171	4.64899e-05	0.00971104
256	TR401895|c0_g1_i1	---NA---					NA	NA	NA	NA	3.55369	3.00354	3.84383e-05	0.00876794
257	TR401895|c0_g2_i1	collagen alpha-1(V) chain-like					NA	NA	NA	NA	1.77473	5.70394	0.000649518	0.0358915
259	TR401912|c1_g1_i2	calsyntenin-1 isoform X1		GO:0007156,GO:0016020,GO:0048670,GO:1990126	homophilic cell adhesion via plasma membrane adhesion molecules,membrane,regulation of collateral sprouting,retrograde transport endosome to plasma membrane	Biological Process,Cellular Component,Biological Process,Biological Process	NA	NA	NA	NA	2.98259	-0.159663	0.00074711	0.0386615
260	TR401921|c4_g1_i1	PREDICTED: uncharacterized protein DDB_G0271670-like					NA	NA	NA	NA	2.02986	0.657482	0.000391466	0.0280571
261	TR401928|c5_g1_i6	---NA---					NA	NA	NA	NA	-3.02753	-0.235829	0.000116822	0.0154299
262	TR401932|c4_g1_i1	---NA---	EC:3.6.1,EC:3.6.1.3,EC:3.6.1.15	GO:0000166,GO:0005215,GO:0006810,GO:0016020,GO:0016887	nucleotide binding,transporter activity,transport,membrane,ATPase activity	Molecular Function,Molecular Function,Biological Process,Cellular Component,Molecular Function	NA	NA	NA	NA	2.06623	3.02274	0.000286558	0.0240613
263	TR401938|c2_g1_i1	PREDICTED: uncharacterized protein LOC101846835					NA	NA	NA	NA	-1.70974	2.43132	0.00114025	0.0471262
264	TR401945|c8_g3_i1	gamma-aminobutyric acid receptor subunit alpha-6		GO:0005216,GO:0006811,GO:0044425,GO:0044464	ion channel activity,ion transport,membrane part,cell part	Molecular Function,Biological Process,Cellular Component,Cellular Component	NA	NA	NA	NA	2.39307	1.82293	0.000104925	0.0143773
265	TR401948|c2_g1_i1	PREDICTED: uncharacterized protein LOC101858572, partial					NA	NA	NA	NA	2.79086	2.37815	6.30512e-05	0.0113317
266	TR401952|c2_g1_i2	---NA---					NA	NA	NA	NA	-1.71385	1.57224	0.000695191	0.037321
267	TR403650|c0_g1_i3	proton-coupled folate transporter-like isoform X1					NA	NA	NA	NA	1.84852	1.22688	0.000871984	0.042096
268	TR403704|c1_g1_i1	---NA---					NA	NA	NA	NA	-1.51864	3.13513	0.00119097	0.0480842
269	TR403719|c0_g2_i1	---NA---					NA	NA	NA	NA	3.45531	-0.294266	0.00087469	0.0421446
271	TR403890|c1_g4_i7	---NA---					NA	NA	NA	NA	2.76645	1.2881	0.000993189	0.0446002
272	TR403891|c1_g3_i1	---NA---					NA	NA	NA	NA	-3.33901	0.191576	2.80578e-05	0.00765599
273	TR403905|c2_g3_i1	calponin homology domain-containing DDB_G0272472- partial					NA	NA	NA	NA	3.48684	-0.776324	0.000907219	0.0428801
274	TR403919|c0_g1_i6	death-associated kinase 1 isoform X1					NA	NA	NA	NA	5.66048	-0.902304	0.000458169	0.0304268
275	TR403936|c3_g3_i2	---NA---					NA	NA	NA	NA	6.87065	-0.269642	2.28087e-05	0.00710166
276	TR403943|c0_g2_i4	PREDICTED: dystrophin-like					NA	NA	NA	NA	2.48293	1.09536	0.000970698	0.044114
277	TR403958|c3_g1_i1	---NA---					NA	NA	NA	NA	-1.70018	1.00511	0.000700526	0.0373725
278	TR403959|c7_g1_i2	---NA---		GO:0008236,GO:0043170	serine-type peptidase activity,macromolecule metabolic process	Molecular Function,Biological Process	NA	NA	NA	NA	-2.35233	0.615139	0.000701018	0.0373725
279	TR403967|c4_g2_i4	---NA---					NA	NA	NA	NA	1.30033	4.49374	0.000341763	0.0263056
281	TR405643|c3_g1_i5	tetratricopeptide repeat 14		GO:0005515	protein binding	Molecular Function	NA	NA	NA	NA	-6.53597	0.711302	5.5059e-05	0.0105016
282	TR405644|c1_g4_i8	calcium uptake 1 mitochondrial-like isoform X1					NA	NA	NA	NA	8.20505	1.54594	0.000256393	0.0226809
283	TR405660|c2_g1_i2	---NA---					NA	NA	NA	NA	5.40317	1.06163	0.000110181	0.0148115
284	TR405671|c2_g5_i1	---NA---					NA	NA	NA	NA	-2.33566	1.03031	0.000972868	0.0441644
285	TR405679|c4_g2_i2	3-oxoacyl-[acyl-carrier- ] chloroplastic-like					NA	NA	NA	NA	2.30412	1.97854	0.000438911	0.0297655
286	TR405685|c4_g2_i1	dentin sialophospho -like					NA	NA	NA	NA	2.96526	0.0445031	0.000247878	0.0223488
288	TR405741|c6_g1_i4	peptidyl-glycine alpha-amidating monooxygenase A-like isoform X1					NA	NA	NA	NA	3.0325	1.00361	1.02312e-06	0.00170269
289	TR405741|c6_g2_i3	peptidyl-alpha-hydroxyglycine alpha-amidating lyase 2-like		GO:0003824	catalytic activity	Molecular Function	NA	NA	NA	NA	2.85065	-0.571843	0.000615665	0.0351132
291	TR405765|c3_g1_i1	ankyrin repeat domain-containing 50					NA	NA	NA	NA	1.2401	2.90915	0.000421995	0.0292622
292	TR405783|c6_g3_i3	---NA---					NA	NA	NA	NA	-6.5532	-0.00151225	0.000473018	0.0309637
294	TR405787|c2_g1_i3	multiple epidermal growth factor-like domains 6- partial					NA	NA	NA	NA	-1.86043	5.72837	0.000601818	0.0346799
295	TR405793|c9_g1_i1	PREDICTED: uncharacterized protein LOC101852005					NA	NA	NA	NA	7.68697	-0.411324	0.000481243	0.0310906
296	TR405793|c9_g1_i3	PREDICTED: uncharacterized protein LOC101852005					NA	NA	NA	NA	2.8792	1.33975	7.55359e-06	0.00433022
297	TR405806|c1_g1_i1	---NA---					NA	NA	NA	NA	3.95621	0.0419053	0.000122069	0.0157237
298	TR405806|c1_g1_i2	paramyosin	EC:3.6.1,EC:3.6.1.15	GO:0003774,GO:0030016,GO:0032982	motor activity,myofibril,myosin filament	Molecular Function,Cellular Component,Cellular Component	NA	NA	NA	NA	2.45912	5.39846	0.000720539	0.0379714
299	TR405806|c1_g1_i4	paramyosin	EC:3.6.1,EC:3.6.1.15	GO:0003774,GO:0016459	motor activity,myosin complex	Molecular Function,Cellular Component	NA	NA	NA	NA	1.80568	4.99865	0.000307023	0.0249733
300	TR405811|c1_g2_i7	calponin-2-like isoform X2					NA	NA	NA	NA	3.27856	0.912892	0.00013338	0.016606
301	TR405824|c10_g2_i1	---NA---					NA	NA	NA	NA	2.19264	4.0087	0.000343829	0.0263603
302	TR406791|c4_g2_i2	histone-lysine N- H3 lysine-79 specific-like isoform X1					NA	NA	NA	NA	2.76227	1.15665	0.000233413	0.0216777
303	TR406805|c3_g1_i1	Pleckstrin domain-containing family A member 7					NA	NA	NA	NA	4.96643	-0.316754	4.80014e-05	0.00983804
305	TR406851|c1_g3_i1	---NA---					NA	NA	NA	NA	-1.68111	3.42431	0.000489973	0.0314003
306	TR406875|c0_g1_i2	thyrotroph embryonic factor-like isoform X2					NA	NA	NA	NA	2.93377	5.90313	3.64712e-07	0.00104431
307	TR410653|c1_g1_i1	PREDICTED: uncharacterized protein LOC101859972		GO:0009987,GO:0050896	cellular process,response to stimulus	Biological Process,Biological Process	NA	NA	NA	NA	2.10445	0.460779	0.000164665	0.0187955
308	TR410653|c1_g2_i5	PREDICTED: uncharacterized protein LOC101859972					NA	NA	NA	NA	2.89746	0.380264	0.000381031	0.0276693
309	TR410658|c2_g1_i1	---NA---					NA	NA	NA	NA	2.4008	0.460874	0.00105665	0.045628
310	TR410658|c2_g8_i7	villin-1-like isoform X1					NA	NA	NA	NA	2.27697	1.18747	5.96935e-05	0.0110137
312	TR410675|c3_g1_i2	---NA---					NA	NA	NA	NA	-1.40453	2.73514	0.00120099	0.0482313
313	TR410675|c3_g2_i4	---NA---					NA	NA	NA	NA	-1.88655	4.40103	7.39516e-05	0.0120896
314	TR410682|c4_g2_i2	choline ethanolaminephosphotransferase 1 isoform X2		GO:0008654,GO:0016021,GO:0016780	phospholipid biosynthetic process,integral component of membrane,phosphotransferase activity for other substituted phosphate groups	Biological Process,Cellular Component,Molecular Function	NA	NA	NA	NA	4.34547	-0.438335	0.000521821	0.0324388
315	TR410736|c1_g2_i1	PREDICTED: uncharacterized protein LOC101853790					NA	NA	NA	NA	3.47177	2.88993	2.94138e-06	0.00287947
316	TR410739|c1_g2_i1	probable G- coupled receptor 75		GO:0007165,GO:0016020	signal transduction,membrane	Biological Process,Cellular Component	NA	NA	NA	NA	2.43687	0.662955	0.000771663	0.039369
317	TR410754|c1_g1_i1	calponin homology domain-containing DDB_G0272472-like isoform X1					NA	NA	NA	NA	1.67437	3.95261	1.21544e-05	0.00518655
318	TR410787|c3_g1_i2	---NA---					NA	NA	NA	NA	-7.04782	0.114362	6.67485e-05	0.0117177
319	TR410798|c1_g1_i3	UDP-glucose 4-epimerase	EC:5.1.3.2	GO:0003978,GO:0019388,GO:0042803,GO:0070062	UDP-glucose 4-epimerase activity,galactose catabolic process,protein homodimerization activity,extracellular exosome	Molecular Function,Biological Process,Molecular Function,Cellular Component	NA	NA	NA	NA	1.36506	3.78763	0.00059456	0.0344572
320	TR410801|c2_g1_i1	tenascin-R-like					NA	NA	NA	NA	3.86925	-0.332759	0.000406818	0.0286879
322	TR410823|c4_g1_i3	traf2 and NCK-interacting kinase-like		GO:0004672,GO:0005524,GO:0006468	protein kinase activity,ATP binding,protein phosphorylation	Molecular Function,Molecular Function,Biological Process	NA	NA	NA	NA	2.12696	0.89707	0.00042869	0.0294374
323	TR410835|c0_g1_i1	polycystic kidney disease 1-like 2-like					NA	NA	NA	NA	2.61104	0.0459557	0.000402054	0.0285212
324	TR410868|c5_g2_i1	Collagen alpha-6(VI) chain					NA	NA	NA	NA	-2.91616	-0.413107	0.000251854	0.0225587
325	TR410887|c3_g6_i1	---NA---					NA	NA	NA	NA	5.62263	-1.04226	7.09475e-05	0.011873
326	TR410887|c4_g3_i1	---NA---					NA	NA	NA	NA	3.23341	-0.373252	0.000845689	0.0415059
328	TR410931|c0_g1_i3	---NA---					NA	NA	NA	NA	3.58799	0.965716	0.000886902	0.0424871
329	TR410933|c4_g2_i11	DNA-directed RNA polymerase III subunit RPC7-like					NA	NA	NA	NA	4.00817	-0.0220656	0.000640191	0.0357044
330	TR410949|c2_g1_i3	---NA---					NA	NA	NA	NA	5.83683	1.80023	1.90253e-07	0.000745172
331	TR410949|c2_g1_i8	---NA---					NA	NA	NA	NA	-7.81611	-0.462074	0.00108074	0.0461651
332	TR411357|c1_g2_i3	PREDICTED: uncharacterized protein LOC101845704					NA	NA	NA	NA	1.37473	2.40146	0.000365728	0.0270032
333	TR411360|c2_g4_i5	---NA---					NA	NA	NA	NA	-7.57202	0.0358603	0.000615327	0.0351132
334	TR411380|c0_g2_i3	MORN repeat-containing 5					NA	NA	NA	NA	-2.76739	2.01296	0.00104861	0.0454763
335	TR411383|c2_g1_i1	strawberry notch 1		GO:0006355	regulation of transcription DNA-templated	Biological Process	NA	NA	NA	NA	5.89277	1.71456	2.74552e-08	0.000253841
336	TR411391|c2_g2_i1	---NA---					NA	NA	NA	NA	2.73236	2.81036	0.000199572	0.0203181
337	TR411427|c3_g2_i7	---NA---					NA	NA	NA	NA	-2.78254	0.635848	0.000386802	0.0279152
339	TR412397|c0_g2_i4	ependymin-related 1-like isoform X1					NA	NA	NA	NA	5.80772	3.3608	9.59494e-05	0.0138853
340	TR412412|c1_g9_i1	dopamine beta-hydroxylase-like					NA	NA	NA	NA	1.25331	3.43626	0.000566139	0.0336493
341	TR412417|c1_g2_i1	---NA---					NA	NA	NA	NA	-10.0214	2.82082	0.00128592	0.0497963
342	TR412417|c1_g2_i4	---NA---					NA	NA	NA	NA	-2.61316	5.23938	0.000222815	0.0212981
343	TR412422|c3_g2_i1	---NA---					NA	NA	NA	NA	-1.54251	4.53135	6.20614e-05	0.011251
344	TR412443|c8_g3_i2	---NA---					NA	NA	NA	NA	3.28681	-0.223637	0.000596845	0.034524
345	TR412446|c1_g1_i6	M-phase phospho 6		GO:0000178,GO:0031981	exosome (RNase complex),nuclear lumen	Cellular Component,Cellular Component	NA	NA	NA	NA	4.53735	2.22482	0.00129551	0.049811
346	TR412455|c1_g1_i1	---NA---					NA	NA	NA	NA	2.23041	0.917307	4.35427e-05	0.00931218
347	TR412467|c0_g1_i1	chitinase-3 1	EC:3.2.1.14	GO:0005615,GO:0005975,GO:0006032,GO:0008843,GO:0050896	extracellular space,carbohydrate metabolic process,chitin catabolic process,endochitinase activity,response to stimulus	Cellular Component,Biological Process,Biological Process,Molecular Function,Biological Process	NA	NA	NA	NA	7.5861	-0.906127	0.000381995	0.0277038
349	TR412486|c3_g1_i1	Universal stress A					NA	NA	NA	NA	2.203	1.30655	0.000112362	0.0150559
350	TR413115|c0_g2_i1	fibrocystin-L-like isoform X3		GO:0016301,GO:0044237,GO:0097159,GO:1901363	kinase activity,cellular metabolic process,organic cyclic compound binding,heterocyclic compound binding	Molecular Function,Biological Process,Molecular Function,Molecular Function	NA	NA	NA	NA	3.29542	1.47056	0.0011783	0.0478124
351	TR413135|c2_g6_i1	---NA---					NA	NA	NA	NA	2.58236	1.02018	0.000464768	0.0306351
352	TR413148|c5_g6_i1	disulfide isomerase-like 2-2-like isoform X1					NA	NA	NA	NA	3.69011	4.50156	4.0365e-05	0.00898017
353	TR413148|c5_g6_i2	disulfide isomerase-like 2-2-like isoform X1					NA	NA	NA	NA	3.19139	0.614255	0.00109893	0.0464414
354	TR413161|c1_g1_i1	heterogeneous nuclear ribonucleo partial		GO:0003676,GO:0044424	nucleic acid binding,intracellular part	Molecular Function,Cellular Component	NA	NA	NA	NA	2.66997	2.5651	0.000908505	0.0428801
355	TR415570|c0_g1_i12	mesocentin-like isoform X4					NA	NA	NA	NA	4.24527	-0.859525	0.000952281	0.0439244
356	TR415570|c0_g1_i8	mesocentin-like isoform X3					NA	NA	NA	NA	3.4093	0.353325	0.000998777	0.0446824
357	TR415600|c2_g4_i1	I-type lectin 3		GO:0016020	membrane	Cellular Component	NA	NA	NA	NA	1.64807	2.98224	8.8678e-05	0.0134213
358	TR415643|c1_g1_i3	PREDICTED: oxysterol-binding protein-related protein 1		GO:0005654,GO:0005770,GO:0006869,GO:0015485,GO:0070062	nucleoplasm,late endosome,lipid transport,cholesterol binding,extracellular exosome	Cellular Component,Cellular Component,Biological Process,Molecular Function,Cellular Component	NA	NA	NA	NA	-2.91252	3.23261	0.00108316	0.0462333
359	TR415658|c0_g4_i1	---NA---					NA	NA	NA	NA	2.88524	0.778943	6.79741e-05	0.0118083
360	TR417569|c9_g1_i1	sphingosine-1-phosphate phosphatase 1		GO:0044237,GO:0044763	cellular metabolic process,single-organism cellular process	Biological Process,Biological Process	NA	NA	NA	NA	2.71998	0.433007	7.84257e-05	0.0126226
361	TR417571|c3_g2_i5	asteroid 1					NA	NA	NA	NA	2.80478	5.89284	1.08507e-05	0.00507881
362	TR417598|c0_g7_i1	Sodium-dependent phosphate transport 2B		GO:0006817,GO:0015114,GO:0016020	phosphate ion transport,phosphate ion transmembrane transporter activity,membrane	Biological Process,Molecular Function,Cellular Component	NA	NA	NA	NA	2.16042	1.52326	0.000191392	0.0201648
363	TR417611|c0_g1_i1	PREDICTED: uncharacterized protein LOC101853874					NA	NA	NA	NA	1.97354	3.29666	3.85945e-05	0.00876794
364	TR417611|c0_g1_i4	PREDICTED: uncharacterized protein LOC101853874					NA	NA	NA	NA	2.43961	1.61613	7.18012e-05	0.0119017
365	TR418063|c2_g1_i1	FRFamide precursor precursor					NA	NA	NA	NA	2.47746	2.7862	7.19816e-06	0.00421807
366	TR418088|c0_g1_i3	PREDICTED: protein FAM114A2-like					NA	NA	NA	NA	2.29115	2.10733	1.3724e-05	0.00550004
367	TR418093|c0_g10_i2	ATP-binding cassette sub-family A member 3-like		GO:0005509	calcium ion binding	Molecular Function	NA	NA	NA	NA	6.51284	-0.970426	0.000741978	0.0385421
368	TR418097|c2_g6_i2	---NA---					NA	NA	NA	NA	-2.13959	1.23653	0.000980166	0.0443264
369	TR418107|c1_g1_i1	fatty acid synthase-like	EC:2.3.1.85	GO:0004312	fatty acid synthase activity	Molecular Function	NA	NA	NA	NA	-1.55376	3.01972	0.000430228	0.0294405
370	TR419206|c4_g1_i1	twitchin isoform X21		GO:0000166,GO:0016301,GO:0016310	nucleotide binding,kinase activity,phosphorylation	Molecular Function,Molecular Function,Biological Process	NA	NA	NA	NA	2.03602	4.19927	1.10291e-05	0.00507881
372	TR419238|c19_g1_i1	coiled-coil domain-containing 147-like isoform X1					NA	NA	NA	NA	-1.23773	5.50013	0.00110006	0.0464656
373	TR419238|c19_g1_i5	---NA---					NA	NA	NA	NA	-3.48504	0.204961	0.000170615	0.0189557
374	TR419254|c3_g5_i1	protocadherin Fat 3-like					NA	NA	NA	NA	3.71545	-0.185449	0.000228167	0.0215261
377	TR419262|c4_g2_i2	TANC1-like isoform X1					NA	NA	NA	NA	1.38956	2.6579	0.000109936	0.0148024
378	TR419263|c15_g3_i7	---NA---					NA	NA	NA	NA	-2.65785	0.868606	0.000315317	0.0252224
379	TR419275|c4_g1_i1	---NA---					NA	NA	NA	NA	-1.7593	3.49294	0.000847554	0.0415102
380	TR419286|c5_g1_i2	hypothetical protein BRAFLDRAFT_76362					NA	NA	NA	NA	-2.07286	1.78997	0.000982059	0.0443628
381	TR419287|c9_g2_i1	attractin 1					NA	NA	NA	NA	7.89308	0.363357	0.000194376	0.0202591
382	TR420218|c2_g1_i7	---NA---					NA	NA	NA	NA	-1.14758	3.89381	0.000959178	0.0440686
384	TR420263|c2_g2_i1	calponin homology domain-containing DDB_G0272472-like					NA	NA	NA	NA	3.19366	1.98089	4.90868e-05	0.00986192
385	TR420275|c0_g3_i1	tiptop-like isoform X5		GO:0010468	regulation of gene expression	Biological Process	NA	NA	NA	NA	3.13407	0.551155	0.000213795	0.0208948
387	TR420299|c1_g3_i3	calmodulin-like isoform X2		GO:0005509	calcium ion binding	Molecular Function	NA	NA	NA	NA	7.41528	-0.84591	5.4444e-05	0.0104386
388	TR422497|c7_g2_i1	cysteine dioxygenase type 1	EC:1.13.11.20,EC:1.13.11	GO:0000097,GO:0005829,GO:0017172,GO:0019451,GO:0042412,GO:0046872	sulfur amino acid biosynthetic process,cytosol,cysteine dioxygenase activity,L-cysteine catabolic process to pyruvate using cysteine dioxygenase,taurine biosynthetic process,metal ion binding	Biological Process,Cellular Component,Molecular Function,Biological Process,Biological Process,Molecular Function	NA	NA	NA	NA	1.33324	3.32015	0.00111073	0.0466662
389	TR422502|c6_g4_i3	mitoferrin-2-like isoform X2		GO:0006810,GO:0016020	transport,membrane	Biological Process,Cellular Component	NA	NA	NA	NA	-3.60615	5.0727	0.000464988	0.0306351
391	TR422522|c1_g3_i1	---NA---					NA	NA	NA	NA	-1.90968	1.82213	0.0011954	0.0481386
392	TR422524|c0_g2_i2	regulating synaptic membrane exocytosis 2-like		GO:0016020	membrane	Cellular Component	NA	NA	NA	NA	3.01679	0.169405	0.000933742	0.0435525
393	TR422556|c1_g2_i1	phosphoenolpyruvate carboxykinase [GTP] mitochondrial-like	EC:4.1.1,EC:4.1.1.32	GO:0004613,GO:0005525,GO:0005739,GO:0006094,GO:0016301,GO:0016310,GO:0070062	phosphoenolpyruvate carboxykinase (GTP) activity,GTP binding,mitochondrion,gluconeogenesis,kinase activity,phosphorylation,extracellular exosome	Molecular Function,Molecular Function,Cellular Component,Biological Process,Molecular Function,Biological Process,Cellular Component	NA	NA	NA	NA	1.66913	6.94076	0.000520462	0.032392
394	TR422565|c1_g1_i1	N-acetylglucosamine-1-phosphotransferase subunits alpha beta-like	EC:2.7.8.17	GO:0000139,GO:0003976,GO:0005515,GO:0007040,GO:0016256,GO:0046835	Golgi membrane,UDP-N-acetylglucosamine-lysosomal-enzyme N-acetylglucosaminephosphotransferase activity,protein binding,lysosome organization,N-glycan processing to lysosome,carbohydrate phosphorylation	Cellular Component,Molecular Function,Molecular Function,Biological Process,Biological Process,Biological Process	NA	NA	NA	NA	-5.17722	0.460492	7.69484e-06	0.00433022
395	TR422566|c4_g1_i3	---NA---		GO:0016021	integral component of membrane	Cellular Component	NA	NA	NA	NA	2.99103	3.04098	1.6087e-05	0.00596527
396	TR422585|c1_g1_i1	cadherin-like and PC-esterase domain-containing 1 isoform X1					NA	NA	NA	NA	1.54245	2.43561	0.000449257	0.0301234
397	TR422612|c1_g10_i1	---NA---					NA	NA	NA	NA	2.16967	1.97625	0.000867182	0.0420507
398	TR422655|c0_g2_i1	sucrase- intestinal		GO:0004553,GO:0005515,GO:0005576,GO:0006355,GO:0007169,GO:0007435,GO:0007507,GO:0008015,GO:0009892,GO:0010033,GO:0010557,GO:0014911,GO:0016020,GO:0022607,GO:0031328,GO:0032101,GO:0044057,GO:0044464,GO:0045860,GO:0045931,GO:0045935,GO:0048523,GO:0048661,GO:0048666,GO:0050730,GO:0050878,GO:0051094,GO:0051240,GO:0051241,GO:0060041,GO:0060429,GO:0070887,GO:0072223,GO:1902533,GO:2000026	hydrolase activity hydrolyzing O-glycosyl compounds,protein binding,extracellular region,regulation of transcription DNA-templated,transmembrane receptor protein tyrosine kinase signaling pathway,salivary gland morphogenesis,heart development,blood circulation,negative regulation of metabolic process,response to organic substance,positive regulation of macromolecule biosynthetic process,positive …	Molecular Function,Molecular Function,Cellular Component,Biological Process,Biological Process,Biological Process,Biological Process,Biological Process,Biological Process,Biological Process,Biological Process,Biological Process,Cellular Component,Biological Process,Biological Process,Biological Process,Biological Process,Cellular Component,Biological Process,Biological Process,Biological Process,…	NA	NA	NA	NA	4.02757	0.656381	9.27919e-05	0.0137205
399	TR423523|c4_g4_i1	---NA---					NA	NA	NA	NA	-1.75816	2.50902	0.000905322	0.0428514
400	TR423537|c1_g1_i8	---NA---					NA	NA	NA	NA	5.32908	0.0195155	0.000113453	0.0151063
401	TR423541|c7_g3_i2	---NA---					NA	NA	NA	NA	2.32086	0.151301	0.0010908	0.0463096
402	TR423544|c5_g2_i1	C-type lectin 2					NA	NA	NA	NA	5.76371	-0.423067	6.05914e-05	0.0110567
404	TR423587|c3_g2_i1	PREDICTED: uncharacterized protein LOC105335200					NA	NA	NA	NA	2.88789	2.82873	0.000129022	0.0162176
405	TR423587|c3_g3_i2	PREDICTED: uncharacterized protein LOC101848577					NA	NA	NA	NA	3.51699	1.07706	6.00529e-05	0.0110369
407	TR425148|c1_g5_i1	---NA---					NA	NA	NA	NA	-2.82242	0.245414	0.000937495	0.0436297
408	TR425160|c5_g1_i4	cyclic AMP-dependent transcription factor ATF-6 alpha-like					NA	NA	NA	NA	3.90499	0.876186	2.31798e-05	0.00711739
409	TR425190|c4_g1_i1	Zonadhesin					NA	NA	NA	NA	5.42686	3.94515	2.36926e-05	0.00716903
410	TR425190|c4_g1_i2	---NA---					NA	NA	NA	NA	5.60108	2.35919	0.000117372	0.0154536
411	TR425190|c4_g2_i1	uncharacterized threonine-rich GPI-anchored glyco -like					NA	NA	NA	NA	5.93202	5.42157	2.09133e-07	0.000756617
413	TR426007|c0_g2_i5	PREDICTED: uncharacterized protein LOC101845368					NA	NA	NA	NA	1.41701	3.32354	0.00042912	0.0294374
414	TR426015|c0_g2_i1	rhamnospondin 1					NA	NA	NA	NA	3.41918	1.66198	0.000435115	0.0297017
415	TR426016|c1_g2_i1	PDZ and LIM domain Zasp-like		GO:0008270,GO:0044424	zinc ion binding,intracellular part	Molecular Function,Cellular Component	NA	NA	NA	NA	1.88794	3.35221	0.000183055	0.0196544
416	TR426022|c6_g4_i2	---NA---					NA	NA	NA	NA	-1.06152	6.19526	0.000547466	0.0331071
417	TR426031|c2_g1_i1	---NA---					NA	NA	NA	NA	-1.77764	5.91604	7.42518e-05	0.0121148
418	TR426061|c2_g1_i3	anoctamin-7-like isoform X1		GO:0016021,GO:0046983	integral component of membrane,protein dimerization activity	Cellular Component,Molecular Function	NA	NA	NA	NA	5.39344	0.454816	1.39303e-05	0.00550004
419	TR426065|c4_g1_i5	---NA---					NA	NA	NA	NA	-9.11721	1.97782	9.95622e-05	0.0140896
420	TR426075|c0_g2_i1	tyrosinase tyr-1					NA	NA	NA	NA	1.7536	2.28032	0.00108707	0.0463096
421	TR426078|c4_g1_i4	Zinc finger Noc		GO:0003676,GO:0046872	nucleic acid binding,metal ion binding	Molecular Function,Molecular Function	NA	NA	NA	NA	3.05774	0.862692	0.000923348	0.0433298
422	TR426086|c1_g1_i9	DNA-binding D-ETS-4 isoform X3		GO:0003700,GO:0005634,GO:0006355,GO:0043565	transcription factor activity sequence-specific DNA binding,nucleus,regulation of transcription DNA-templated,sequence-specific DNA binding	Molecular Function,Cellular Component,Biological Process,Molecular Function	NA	NA	NA	NA	3.55084	-0.244381	0.000519124	0.0323814
423	TR426090|c3_g3_i7	GATA zinc finger domain-containing 10-like					NA	NA	NA	NA	6.33172	-0.335132	0.00103698	0.0453978
424	TR426101|c0_g2_i1	Zinc finger CCCH domain-containing 18					NA	NA	NA	NA	8.15432	0.86046	9.06288e-07	0.00163942
425	TR426107|c2_g2_i2	---NA---					NA	NA	NA	NA	6.7029	-0.621211	1.93266e-05	0.00647266
426	TR426124|c4_g1_i3	---NA---					NA	NA	NA	NA	4.61893	-0.621723	0.000724888	0.0381515
427	TR426124|c4_g2_i1	chitin binding					NA	NA	NA	NA	2.60968	0.912336	0.000298907	0.0246664
428	TR426124|c4_g2_i6	chitin binding					NA	NA	NA	NA	6.096	0.648337	9.95103e-07	0.00168987
429	TR426124|c4_g2_i7	chitin binding					NA	NA	NA	NA	5.38035	0.443381	8.24611e-05	0.012971
430	TR426127|c3_g6_i1	Peptidase inhibitor partial					NA	NA	NA	NA	2.20546	3.21004	0.00033633	0.0260823
431	TR426143|c1_g1_i4	peroxisomal carnitine O-octanoyltransferase		GO:0044237,GO:0044238,GO:0044281,GO:0044763,GO:0071704	cellular metabolic process,primary metabolic process,small molecule metabolic process,single-organism cellular process,organic substance metabolic process	Biological Process,Biological Process,Biological Process,Biological Process,Biological Process	NA	NA	NA	NA	6.5954	-0.150409	0.00067027	0.0364059
432	TR426144|c1_g3_i3	---NA---					NA	NA	NA	NA	-2.37526	2.33641	3.87922e-05	0.00876794
433	TR426146|c5_g1_i2	---NA---					NA	NA	NA	NA	-1.59069	2.82036	0.00096999	0.044114
435	TR426169|c0_g1_i1	polypeptide N-acetylgalactosaminyltransferase 5-like		GO:0005794,GO:0016020,GO:0016740	Golgi apparatus,membrane,transferase activity	Cellular Component,Cellular Component,Molecular Function	NA	NA	NA	NA	4.36417	-0.348722	0.000231373	0.0216567
436	TR426182|c1_g1_i1	probable 3 ,5 -cyclic phosphodiesterase pde-5 isoform X1					NA	NA	NA	NA	-1.52325	4.93582	0.00111139	0.0466662
437	TR426184|c0_g1_i1	---NA---					NA	NA	NA	NA	-1.98677	5.32085	4.11979e-05	0.00909315
438	TR426184|c0_g2_i3	coiled-coil domain-containing 18-like isoform X1					NA	NA	NA	NA	-2.45987	1.3186	0.000151741	0.0179865
439	TR427989|c0_g5_i8	PREDICTED: uncharacterized protein LOC101862638					NA	NA	NA	NA	4.49213	0.230032	0.000442582	0.0298134
440	TR427993|c2_g2_i8	sodium- and chloride-dependent glycine transporter 2-like		GO:0006810,GO:0015293,GO:0016020	transport,symporter activity,membrane	Biological Process,Molecular Function,Cellular Component	NA	NA	NA	NA	4.98594	0.765118	0.000590834	0.0344419
441	TR428058|c3_g1_i1	PREDICTED: uncharacterized protein LOC101864455					NA	NA	NA	NA	2.57954	1.50754	0.00105831	0.0456523
442	TR428059|c2_g4_i3	---NA---					NA	NA	NA	NA	-1.63833	6.28376	0.00102217	0.0451702
443	TR428083|c1_g3_i1	---NA---					NA	NA	NA	NA	-1.13261	3.06467	0.000974986	0.0441882
444	TR429478|c1_g1_i1	PREDICTED: uncharacterized protein LOC101845595					NA	NA	NA	NA	3.04833	1.60836	5.57588e-05	0.010593
445	TR429505|c2_g4_i2	---NA---					NA	NA	NA	NA	-1.84538	2.39529	0.00112611	0.0469231
446	TR429513|c4_g4_i3	PREDICTED: uncharacterized protein LOC101854116, partial					NA	NA	NA	NA	1.53621	4.21886	1.25302e-05	0.00529265
447	TR429513|c4_g9_i3	---NA---					NA	NA	NA	NA	3.23037	-0.109582	2.7659e-05	0.00765599
448	TR429516|c0_g5_i2	---NA---					NA	NA	NA	NA	-2.30952	1.06032	7.02106e-05	0.011873
449	TR429526|c0_g2_i2	Glutamine synthetase	EC:6.3.1,EC:6.3.1.2	GO:0004356,GO:0005524,GO:0006542	glutamate-ammonia ligase activity,ATP binding,glutamine biosynthetic process	Molecular Function,Molecular Function,Biological Process	NA	NA	NA	NA	1.90353	2.95085	5.41195e-05	0.0104003
450	TR429526|c1_g3_i1	Glutamine synthetase	EC:6.3.1,EC:6.3.1.2	GO:0004356,GO:0005524,GO:0006542	glutamate-ammonia ligase activity,ATP binding,glutamine biosynthetic process	Molecular Function,Molecular Function,Biological Process	NA	NA	NA	NA	2.11847	4.68226	1.89366e-06	0.00231726
451	TR429526|c1_g5_i1	---NA---					NA	NA	NA	NA	2.93612	1.2763	0.000770327	0.0393491
452	TR432560|c0_g1_i1	domain-containing 5					NA	NA	NA	NA	3.89923	-0.698695	0.0009696	0.044114
453	TR432560|c0_g4_i1	domain-containing 5					NA	NA	NA	NA	2.87353	2.97857	0.000247899	0.0223488
455	TR432585|c5_g1_i1	gastrula zinc finger -like isoform X1					NA	NA	NA	NA	-5.76166	1.43927	0.00112169	0.0468501
457	TR432610|c0_g1_i2	---NA---					NA	NA	NA	NA	3.83096	0.629388	0.000499184	0.0316598
458	TR432877|c2_g4_i5	---NA---					NA	NA	NA	NA	-2.86153	0.109821	0.000480337	0.0310678
459	TR432895|c1_g7_i3	calcium-transporting ATPase sarcoplasmic endoplasmic reticulum type-like	EC:3.6.1,EC:3.6.1.3,EC:3.6.3.8,EC:3.6.1.15	GO:0005388,GO:0005524,GO:0016021,GO:0033017,GO:0046872,GO:0070588	calcium-transporting ATPase activity,ATP binding,integral component of membrane,sarcoplasmic reticulum membrane,metal ion binding,calcium ion transmembrane transport	Molecular Function,Molecular Function,Cellular Component,Cellular Component,Molecular Function,Biological Process	NA	NA	NA	NA	5.84163	1.54727	2.9996e-05	0.00786674
460	TR432912|c1_g3_i1	---NA---					NA	NA	NA	NA	-1.43952	3.53113	0.000504979	0.0318815
461	TR432923|c2_g1_i1	beta-1,3-galactosyl-O-glycosyl-glyco beta-1,6-N-acetylglucosaminyltransferase 4-like					NA	NA	NA	NA	2.12124	1.20598	5.82968e-05	0.0108479
462	TR432931|c5_g1_i1	---NA---					NA	NA	NA	NA	-1.59296	3.48541	0.000940631	0.0436779
463	TR432954|c2_g4_i8	---NA---					NA	NA	NA	NA	4.70873	-1.09253	0.00129234	0.0497963
464	TR436115|c2_g3_i1	PREDICTED: uncharacterized protein LOC101854311					NA	NA	NA	NA	1.95346	4.38614	0.000396705	0.0282139
465	TR436115|c2_g4_i1	PREDICTED: uncharacterized protein LOC101854551					NA	NA	NA	NA	3.00092	3.06619	9.94307e-05	0.0140896
466	TR436135|c7_g2_i1	---NA---					NA	NA	NA	NA	3.1979	2.17254	2.52925e-05	0.0073588
467	TR436140|c5_g3_i1	collagen alpha-1(XII) chain-like					NA	NA	NA	NA	1.69413	2.34461	0.000747818	0.0386741
468	TR436146|c5_g2_i1	timeless-like isoform X1					NA	NA	NA	NA	2.16852	2.00581	0.000654511	0.0359251
469	TR436159|c0_g1_i1	Chromobox homolog 4 (Polycomb 2 homolog) (Pc2) (MPc2) isoform partial		GO:0000122,GO:0003682,GO:0003727,GO:0016604,GO:0016925,GO:0019789,GO:0019899,GO:0032183,GO:0035064,GO:0035102,GO:0044212,GO:0051219	negative regulation of transcription from RNA polymerase II promoter,chromatin binding,single-stranded RNA binding,nuclear body,protein sumoylation,SUMO transferase activity,enzyme binding,SUMO binding,methylated histone binding,PRC1 complex,transcription regulatory region DNA binding,phosphoprotein binding	Biological Process,Molecular Function,Molecular Function,Cellular Component,Biological Process,Molecular Function,Molecular Function,Molecular Function,Molecular Function,Cellular Component,Molecular Function,Molecular Function	NA	NA	NA	NA	2.93176	1.42069	7.15443e-05	0.0119017
470	TR436162|c2_g1_i2	---NA---					NA	NA	NA	NA	-7.39253	-0.130214	0.000619388	0.0351579
471	TR436170|c5_g3_i5	PREDICTED: uncharacterized protein LOC101862063					NA	NA	NA	NA	2.64704	2.214	0.000238637	0.0219175
472	TR436170|c5_g4_i1	---NA---					NA	NA	NA	NA	2.42919	1.08419	0.00022225	0.0212959
474	TR437290|c0_g2_i3	kinase domain-containing partial		GO:0004672,GO:0006468,GO:0048731	protein kinase activity,protein phosphorylation,system development	Molecular Function,Biological Process,Biological Process	NA	NA	NA	NA	4.89247	0.925911	0.000619829	0.0351579
475	TR437301|c6_g1_i1	---NA---					NA	NA	NA	NA	-2.85487	-0.590221	0.00100244	0.0447547
476	TR437302|c0_g1_i1	transforming growth factor beta receptor type 3 isoform X2					NA	NA	NA	NA	2.62045	1.54574	0.000382208	0.0277038
477	TR437324|c0_g2_i2	---NA---					NA	NA	NA	NA	-2.0533	1.41476	0.000213631	0.0208948
478	TR437340|c9_g2_i1	stAR-related lipid transfer 5		GO:0008289	lipid binding	Molecular Function	NA	NA	NA	NA	3.13077	-0.576793	0.0010332	0.0453925
479	TR437350|c1_g1_i1	dentin sialophospho -like isoform X1					NA	NA	NA	NA	1.59494	3.12949	0.000233322	0.0216777
480	TR437352|c3_g13_i1	---NA---					NA	NA	NA	NA	3.15274	-0.534306	0.000152887	0.0180709
481	TR437352|c3_g15_i1	---NA---					NA	NA	NA	NA	2.1532	0.536309	0.00120503	0.0483348
482	TR437352|c3_g4_i1	---NA---					NA	NA	NA	NA	1.83329	0.893041	0.000970268	0.044114
483	TR437356|c1_g2_i9	nuclear mitotic apparatus 1-like					NA	NA	NA	NA	-6.46683	-0.416358	6.88085e-05	0.0118134
484	TR439604|c2_g2_i1	PC3-like endoprotease variant B		GO:0008233	peptidase activity	Molecular Function	NA	NA	NA	NA	1.71489	2.57404	0.000102493	0.0142335
485	TR439604|c2_g5_i1	hypothetical protein PPL_05225		GO:0046872	metal ion binding	Molecular Function	NA	NA	NA	NA	2.4467	0.633756	0.000253097	0.0226214
486	TR440042|c7_g2_i6	---NA---					NA	NA	NA	NA	-1.9411	2.64662	0.000548311	0.0331071
487	TR440067|c0_g1_i3	pre-B-cell leukemia transcription factor 1-like		GO:0001944,GO:0003700,GO:0005634,GO:0006355,GO:0030223,GO:0043565,GO:0048795,GO:0060216	vasculature development,transcription factor activity sequence-specific DNA binding,nucleus,regulation of transcription DNA-templated,neutrophil differentiation,sequence-specific DNA binding,swim bladder morphogenesis,definitive hemopoiesis	Biological Process,Molecular Function,Cellular Component,Biological Process,Biological Process,Molecular Function,Biological Process,Biological Process	NA	NA	NA	NA	1.58238	3.71728	0.000291394	0.0243935
488	TR440079|c1_g1_i1	---NA---					NA	NA	NA	NA	4.01117	2.05545	4.61328e-06	0.00335474
489	TR440079|c1_g1_i3	---NA---					NA	NA	NA	NA	3.87808	0.438486	0.00019668	0.0202652
490	TR440079|c1_g4_i1	---NA---					NA	NA	NA	NA	2.23456	3.89061	0.000368276	0.0271432
491	TR440079|c1_g4_i2	---NA---					NA	NA	NA	NA	3.46915	2.01111	0.000105583	0.0144028
492	TR440081|c3_g4_i1	annexin A6-like isoform X1					NA	NA	NA	NA	3.18607	2.18604	0.000223498	0.0213114
493	TR440084|c1_g2_i3	PREDICTED: TNF receptor-associated factor 5-like					NA	NA	NA	NA	5.06263	0.501741	0.000234893	0.02179
494	TR440098|c0_g6_i2	tissue-type plasminogen activator-like	EC:3.4.21	GO:0004252,GO:0006508	serine-type endopeptidase activity,proteolysis	Molecular Function,Biological Process	NA	NA	NA	NA	2.33574	1.21203	0.000302114	0.0247945
495	TR440102|c2_g1_i2	---NA---					NA	NA	NA	NA	2.88525	0.353407	0.00109006	0.0463096
496	TR440105|c3_g1_i1	cytoplasmic intermediate filament A		GO:0005198,GO:0005737,GO:0005882	structural molecule activity,cytoplasm,intermediate filament	Molecular Function,Cellular Component,Cellular Component	NA	NA	NA	NA	1.67514	3.27614	5.15266e-05	0.0102329
497	TR440114|c1_g1_i1	isoform b					NA	NA	NA	NA	3.7347	-0.1802	0.00104385	0.0454525
498	TR440576|c1_g3_i4	---NA---					NA	NA	NA	NA	-1.23737	5.14402	0.00112725	0.0469234
499	TR440587|c2_g2_i2	neuroglian-like isoform X1					NA	NA	NA	NA	2.03621	3.2429	0.000996782	0.0446733
502	TR440618|c2_g1_i1	multiple EGF and TSP domain-containing					NA	NA	NA	NA	2.24638	7.83042	7.91415e-05	0.0127118
503	TR440618|c2_g1_i3	---NA---					NA	NA	NA	NA	4.08193	4.14746	1.9548e-06	0.00234736
504	TR440618|c2_g2_i1	c-binding -like					NA	NA	NA	NA	3.93755	4.96333	3.08193e-07	0.00098635
505	TR440631|c1_g1_i5	PREDICTED: epsin-1-like					NA	NA	NA	NA	8.11595	0.733744	0.0011727	0.0477787
506	TR440634|c12_g1_i1	innexin unc-9-like isoform X1		GO:0005921,GO:0006811,GO:0016021	gap junction,ion transport,integral component of membrane	Cellular Component,Biological Process,Cellular Component	NA	NA	NA	NA	1.42296	3.97707	0.000301428	0.0247847
509	TR440651|c5_g1_i1	protocadherin Fat 4-like					NA	NA	NA	NA	1.7583	3.48085	0.000187621	0.0199899
510	TR440656|c3_g2_i2	---NA---					NA	NA	NA	NA	-1.95602	2.22171	0.000224917	0.0213981
512	TR442236|c2_g1_i1	myosin essential light chain		GO:0005509,GO:0016459	calcium ion binding,myosin complex	Molecular Function,Cellular Component	NA	NA	NA	NA	4.54905	0.311316	9.29764e-05	0.0137205
513	TR442238|c1_g1_i6	---NA---					NA	NA	NA	NA	2.15365	1.96363	0.000790799	0.0399251
514	TR442252|c10_g3_i4	---NA---					NA	NA	NA	NA	-2.00648	0.470162	0.000267871	0.0231101
515	TR442268|c1_g5_i3	---NA---					NA	NA	NA	NA	4.61323	0.555803	0.000171021	0.0189744
516	TR442273|c5_g2_i4	soluble acetylcholine binding		GO:0003009,GO:0004889,GO:0006811,GO:0007165,GO:0007274,GO:0007528,GO:0009986,GO:0016021,GO:0019228,GO:0031594,GO:0044459,GO:0046716,GO:0048630,GO:0050905,GO:0070050	skeletal muscle contraction,acetylcholine-gated cation-selective channel activity,ion transport,signal transduction,neuromuscular synaptic transmission,neuromuscular junction development,cell surface,integral component of membrane,neuronal action potential,neuromuscular junction,plasma membrane part,muscle cell cellular homeostasis,skeletal muscle tissue growth,neuromuscular process,neuron cellul…	Biological Process,Molecular Function,Biological Process,Biological Process,Biological Process,Biological Process,Cellular Component,Cellular Component,Biological Process,Cellular Component,Cellular Component,Biological Process,Biological Process,Biological Process,Biological Process	NA	NA	NA	NA	4.97335	-0.893854	0.000734017	0.0384076
517	TR442273|c5_g2_i8	soluble acetylcholine binding		GO:0003009,GO:0004889,GO:0006811,GO:0007165,GO:0007274,GO:0007528,GO:0009986,GO:0016021,GO:0019228,GO:0031594,GO:0044459,GO:0046716,GO:0048630,GO:0050905,GO:0070050	skeletal muscle contraction,acetylcholine-gated cation-selective channel activity,ion transport,signal transduction,neuromuscular synaptic transmission,neuromuscular junction development,cell surface,integral component of membrane,neuronal action potential,neuromuscular junction,plasma membrane part,muscle cell cellular homeostasis,skeletal muscle tissue growth,neuromuscular process,neuron cellul…	Biological Process,Molecular Function,Biological Process,Biological Process,Biological Process,Biological Process,Cellular Component,Cellular Component,Biological Process,Cellular Component,Cellular Component,Biological Process,Biological Process,Biological Process,Biological Process	NA	NA	NA	NA	3.52947	-0.302115	0.000318369	0.0252896
518	TR442284|c1_g3_i7	von Willebrand factor type EGF and pentraxin domain-containing 1-like					NA	NA	NA	NA	13.0858	6.97885	3.94467e-06	0.0031261
519	TR442287|c0_g7_i1	---NA---					NA	NA	NA	NA	-2.1867	1.70623	0.000474648	0.0310156
522	TR443844|c5_g5_i1	---NA---					NA	NA	NA	NA	6.62204	-0.937238	0.00025953	0.0227324
525	TR443846|c2_g4_i2	sodium-dependent proline transporter-like isoform X1		GO:0006810,GO:0015293,GO:0016020	transport,symporter activity,membrane	Biological Process,Molecular Function,Cellular Component	NA	NA	NA	NA	1.44594	3.63273	8.56586e-05	0.0131545
526	TR443858|c0_g3_i2	zinc finger BED domain-containing 1-like					NA	NA	NA	NA	7.33598	1.17943	0.000905318	0.0428514
527	TR443868|c0_g1_i2	---NA---					NA	NA	NA	NA	5.93833	-1.04295	0.00104796	0.0454763
529	TR443938|c2_g3_i1	PREDICTED: zinc metalloproteinase-disintegrin batroxstatin-3-like					NA	NA	NA	NA	3.01849	0.711498	0.000997956	0.0446733
530	TR444655|c1_g3_i1	---NA---					NA	NA	NA	NA	-1.85595	3.53342	0.000587973	0.0344083
531	TR444655|c1_g6_i1	---NA---					NA	NA	NA	NA	-1.76265	4.52714	0.000356862	0.026757
532	TR444655|c1_g7_i1	---NA---					NA	NA	NA	NA	-2.26243	3.63328	0.000583279	0.0343235
533	TR444670|c1_g1_i2	---NA---					NA	NA	NA	NA	1.0083	7.74049	0.00114036	0.0471262
534	TR444670|c1_g2_i1	---NA---					NA	NA	NA	NA	1.20021	4.51052	0.00122013	0.048578
535	TR444670|c2_g1_i2	---NA---					NA	NA	NA	NA	1.38572	7.42217	0.000105051	0.0143773
539	TR444718|c0_g2_i1	PREDICTED: uncharacterized protein LOC101854551					NA	NA	NA	NA	7.17571	-1.19053	0.00115103	0.0473151
540	TR444754|c1_g1_i2	---NA---					NA	NA	NA	NA	3.17789	1.76482	0.000275852	0.0235425
541	TR444760|c9_g3_i6	---NA---					NA	NA	NA	NA	-2.51422	3.40436	0.00058367	0.0343235
542	TR444782|c3_g1_i1	plexin-B		GO:0007165,GO:0007411,GO:0016020,GO:0016787	signal transduction,axon guidance,membrane,hydrolase activity	Biological Process,Biological Process,Cellular Component,Molecular Function	NA	NA	NA	NA	1.92317	2.28293	0.000338286	0.0262018
543	TR444787|c0_g1_i6	---NA---					NA	NA	NA	NA	-1.55117	7.04461	0.000948492	0.0438936
544	TR444790|c3_g1_i3	NCAM-related adhesion molecule					NA	NA	NA	NA	2.0009	1.30855	0.000800398	0.0402378
545	TR444795|c3_g1_i1	microtubule-associated futsch-like					NA	NA	NA	NA	2.27894	2.0017	0.000315102	0.0252224
546	TR444805|c0_g1_i3	neuroendocrine convertase 2-like	EC:3.4.21	GO:0004252,GO:0006508	serine-type endopeptidase activity,proteolysis	Molecular Function,Biological Process	NA	NA	NA	NA	2.45672	3.08106	3.87794e-05	0.00876794
547	TR445193|c1_g2_i2	GPI-anchored -like					NA	NA	NA	NA	6.28837	-0.448867	0.000380609	0.0276693
548	TR445194|c11_g1_i2	alpha skeletal muscle					NA	NA	NA	NA	-3.17898	5.25232	4.73608e-06	0.00339736
549	TR445194|c11_g1_i5	beta- partial		GO:0005524,GO:0005856,GO:0005886,GO:0005925,GO:0097433	ATP binding,cytoskeleton,plasma membrane,focal adhesion,dense body	Molecular Function,Cellular Component,Cellular Component,Cellular Component,Cellular Component	NA	NA	NA	NA	1.48383	6.0732	0.00103952	0.0453978
550	TR445194|c11_g1_i6	alpha skeletal muscle					NA	NA	NA	NA	3.30021	3.86224	0.000496116	0.0316096
551	TR445194|c11_g2_i6	beta- partial					NA	NA	NA	NA	1.33371	5.17013	6.16278e-05	0.0112212
552	TR445194|c11_g4_i1	beta- partial		GO:0005524,GO:0005829,GO:0005856,GO:0005886,GO:0005925,GO:0097433	ATP binding,cytosol,cytoskeleton,plasma membrane,focal adhesion,dense body	Molecular Function,Cellular Component,Cellular Component,Cellular Component,Cellular Component,Cellular Component	NA	NA	NA	NA	2.80711	1.35789	0.000243275	0.0222204
553	TR445225|c0_g1_i1	---NA---					NA	NA	NA	NA	-1.89667	1.97253	0.000742016	0.0385421
554	TR445235|c0_g2_i2	40S ribosomal S12-like		GO:0003735,GO:0005840,GO:0006412	structural constituent of ribosome,ribosome,translation	Molecular Function,Cellular Component,Biological Process	NA	NA	NA	NA	-2.2528	8.47537	3.97143e-05	0.00885971
555	TR445256|c4_g7_i1	---NA---					NA	NA	NA	NA	3.40293	1.13391	0.000892015	0.0426265
557	TR445267|c3_g1_i2	---NA---					NA	NA	NA	NA	1.59444	3.48631	0.00106761	0.0458255
558	TR445267|c3_g5_i2	---NA---					NA	NA	NA	NA	2.62333	1.86147	3.0536e-05	0.00787733
559	TR445280|c1_g1_i1	---NA---					NA	NA	NA	NA	-2.22226	1.06837	0.000481925	0.0311105
560	TR445280|c1_g2_i1	---NA---					NA	NA	NA	NA	-1.8742	2.27519	0.000424949	0.0293759
561	TR448948|c1_g2_i3	Fibronectin type III domain-containing 1					NA	NA	NA	NA	2.99222	1.47062	2.3933e-05	0.0071895
562	TR448949|c4_g2_i2	---NA---					NA	NA	NA	NA	-2.24765	0.166834	0.000632623	0.0355456
563	TR448964|c0_g1_i5	PREDICTED: uncharacterized protein LOC101859738 isoform X2					NA	NA	NA	NA	1.94953	0.522374	0.000809026	0.0403516
564	TR448973|c1_g1_i2	---NA---					NA	NA	NA	NA	6.77411	-0.862675	0.000280688	0.0237844
565	TR449296|c0_g1_i4	PREDICTED: mucin-17-like					NA	NA	NA	NA	2.35494	0.913256	0.00119809	0.0481849
566	TR449299|c2_g2_i5	ubiquitin carboxyl-terminal hydrolase 2-like	EC:3.4,EC:3.4.19.12	GO:0006511,GO:0016579,GO:0036459	ubiquitin-dependent protein catabolic process,protein deubiquitination,thiol-dependent ubiquitinyl hydrolase activity	Biological Process,Biological Process,Molecular Function	NA	NA	NA	NA	-1.02251	6.55413	0.00129664	0.049811
567	TR449306|c0_g1_i1	E3 ubiquitin- ligase UNKL isoform X4					NA	NA	NA	NA	1.21522	6.10017	0.000459726	0.0304815
569	TR449352|c1_g2_i1	lysosome-associated membrane glyco 1-like					NA	NA	NA	NA	1.52969	5.4225	0.000808035	0.0403443
570	TR449362|c2_g5_i5	---NA---					NA	NA	NA	NA	-2.42096	3.34767	0.0006064	0.0348957
571	TR449389|c2_g1_i1	Potassium voltage-gated channel subfamily A member 2		GO:0005251,GO:0006813,GO:0009987,GO:0016021,GO:0055085	delayed rectifier potassium channel activity,potassium ion transport,cellular process,integral component of membrane,transmembrane transport	Molecular Function,Biological Process,Biological Process,Cellular Component,Biological Process	NA	NA	NA	NA	5.04833	-0.866142	2.14041e-05	0.00681647
572	TR449393|c1_g1_i5	---NA---					NA	NA	NA	NA	-1.66845	3.45164	0.00105337	0.0455407
574	TR450634|c2_g1_i1	hormonally up-regulated neu tumor-associated kinase	EC:2.7.11	GO:0004674,GO:0005524,GO:0005634,GO:0005737,GO:0006468,GO:0035556	protein serine/threonine kinase activity,ATP binding,nucleus,cytoplasm,protein phosphorylation,intracellular signal transduction	Molecular Function,Molecular Function,Cellular Component,Cellular Component,Biological Process,Biological Process	NA	NA	NA	NA	2.24309	0.304505	0.000720284	0.0379714
575	TR450637|c2_g1_i3	PREDICTED: uncharacterized protein LOC105337195	EC:3.4.24	GO:0004222,GO:0006508,GO:0008270	metalloendopeptidase activity,proteolysis,zinc ion binding	Molecular Function,Biological Process,Molecular Function	NA	NA	NA	NA	2.65108	1.38485	0.000314126	0.0252224
576	TR450637|c2_g2_i2	hypothetical protein LOTGIDRAFT_238951					NA	NA	NA	NA	2.71909	-0.0979871	0.000951189	0.0438992
577	TR450642|c4_g3_i1	cell death-inducing p53-target 1-like isoform X1		GO:0016021	integral component of membrane	Cellular Component	NA	NA	NA	NA	1.5857	3.5216	1.96632e-05	0.00649282
578	TR450655|c1_g1_i3	synaptotagmin 15a		GO:0005488,GO:0008152,GO:0016020,GO:0016627,GO:0044464,GO:0044763,GO:0065007	binding,metabolic process,membrane,oxidoreductase activity acting on the CH-CH group of donors,cell part,single-organism cellular process,biological regulation	Molecular Function,Biological Process,Cellular Component,Molecular Function,Cellular Component,Biological Process,Biological Process	NA	NA	NA	NA	2.45492	1.16946	0.000644456	0.0358701
579	TR450663|c1_g1_i4	vacuolar H[+] ATPase 44kD isoform A	EC:3.6.1,EC:3.6.1.3,EC:3.6.1.15	GO:0000221,GO:0007557,GO:0015991,GO:0019233,GO:0033181,GO:0046961	vacuolar proton-transporting V-type ATPase V1 domain,regulation of juvenile hormone biosynthetic process,ATP hydrolysis coupled proton transport,sensory perception of pain,plasma membrane proton-transporting V-type ATPase complex,proton-transporting ATPase activity rotational mechanism	Cellular Component,Biological Process,Biological Process,Biological Process,Cellular Component,Molecular Function	NA	NA	NA	NA	2.59895	1.99066	0.00076741	0.0392966
580	TR450665|c2_g6_i6	ammonium transporter 1		GO:0005887,GO:0008519,GO:0015695,GO:0019740,GO:0072488	integral component of plasma membrane,ammonium transmembrane transporter activity,organic cation transport,nitrogen utilization,ammonium transmembrane transport	Cellular Component,Molecular Function,Biological Process,Biological Process,Biological Process	NA	NA	NA	NA	5.04493	-0.544947	0.000160955	0.0185591
581	TR453483|c1_g1_i5	EGF-like domain-containing 1-like					NA	NA	NA	NA	8.8623	-0.157221	0.000203704	0.0203731
582	TR453499|c1_g1_i8	Serine threonine- phosphatase 2A catalytic subunit beta isoform	EC:3.1.3.16,EC:3.1,EC:3.1.3.41	GO:0000159,GO:0000775,GO:0000922,GO:0004721,GO:0005515,GO:0005634,GO:0005737,GO:0006470,GO:0008637,GO:0010468,GO:0034976,GO:0042542,GO:0043161,GO:0046677,GO:0046872,GO:0070062	protein phosphatase type 2A complex,chromosome centromeric region,spindle pole,phosphoprotein phosphatase activity,protein binding,nucleus,cytoplasm,protein dephosphorylation,apoptotic mitochondrial changes,regulation of gene expression,response to endoplasmic reticulum stress,response to hydrogen peroxide,proteasome-mediated ubiquitin-dependent protein catabolic process,response to antibiotic,me…	Cellular Component,Cellular Component,Cellular Component,Molecular Function,Molecular Function,Cellular Component,Cellular Component,Biological Process,Biological Process,Biological Process,Biological Process,Biological Process,Biological Process,Biological Process,Molecular Function,Cellular Component	NA	NA	NA	NA	3.47869	0.330053	0.000331168	0.025859
583	TR453510|c9_g1_i1	---NA---					NA	NA	NA	NA	-2.17403	0.111871	0.000788075	0.0399106
584	TR453528|c5_g3_i6	---NA---					NA	NA	NA	NA	-4.12716	-0.421697	0.00076512	0.0392276
585	TR453539|c7_g3_i1	PREDICTED: uncharacterized protein LOC101863352					NA	NA	NA	NA	-4.94599	0.45364	1.4271e-05	0.00550004
586	TR453572|c1_g1_i1	glutamine--fructose-6-phosphate aminotransferase [isomerizing] 2-like isoform X7	EC:2.6.1.16	GO:0004360,GO:0005975,GO:0030246,GO:1901137	glutamine-fructose-6-phosphate transaminase (isomerizing) activity,carbohydrate metabolic process,carbohydrate binding,carbohydrate derivative biosynthetic process	Molecular Function,Biological Process,Molecular Function,Biological Process	NA	NA	NA	NA	1.22277	4.59219	0.000497589	0.0316309
587	TR453757|c0_g9_i1	PREDICTED: uncharacterized protein LOC101854339 isoform X1					NA	NA	NA	NA	5.79884	-0.143868	2.48395e-05	0.00730361
588	TR453761|c1_g1_i1	troponin T-like isoform X1		GO:0005861,GO:0006937	troponin complex,regulation of muscle contraction	Cellular Component,Biological Process	NA	NA	NA	NA	3.44966	1.07621	0.00023303	0.0216777
589	TR453761|c1_g1_i4	---NA---					NA	NA	NA	NA	4.48128	2.02041	0.000183304	0.0196558
590	TR453761|c1_g1_i5	troponin T		GO:0005861,GO:0006937	troponin complex,regulation of muscle contraction	Cellular Component,Biological Process	NA	NA	NA	NA	3.97022	2.26469	1.4149e-05	0.00550004
591	TR453761|c1_g2_i2	---NA---					NA	NA	NA	NA	2.88106	2.0442	0.00031851	0.0252896
592	TR453810|c4_g7_i1	PREDICTED: uncharacterized protein LOC101854426					NA	NA	NA	NA	2.64039	2.3915	0.00084647	0.0415059
593	TR454864|c0_g5_i1	S-adenosylmethionine synthase isoform X5	EC:2.5.1.6	GO:0004478,GO:0005524,GO:0006556,GO:0006730,GO:0046872	methionine adenosyltransferase activity,ATP binding,S-adenosylmethionine biosynthetic process,one-carbon metabolic process,metal ion binding	Molecular Function,Molecular Function,Biological Process,Biological Process,Molecular Function	NA	NA	NA	NA	-6.62691	-0.788966	4.3538e-05	0.00931218
595	TR454900|c4_g1_i1	HHIP 1 isoform X1		GO:0005737	cytoplasm	Cellular Component	NA	NA	NA	NA	1.71251	0.861354	0.000785959	0.0398297
596	TR454912|c1_g2_i1	sodium-dependent proline transporter-like isoform X1		GO:0005328,GO:0006836,GO:0016021,GO:0055085	neurotransmitter:sodium symporter activity,neurotransmitter transport,integral component of membrane,transmembrane transport	Molecular Function,Biological Process,Cellular Component,Biological Process	NA	NA	NA	NA	1.84828	2.04577	0.000148017	0.0176963
597	TR454935|c1_g5_i1	cyclin-dependent kinase 5 activator 1-like		GO:0006928,GO:0007420,GO:0040011,GO:0043539,GO:0044424,GO:0045860,GO:0048699,GO:0051128	movement of cell or subcellular component,brain development,locomotion,protein serine/threonine kinase activator activity,intracellular part,positive regulation of protein kinase activity,generation of neurons,regulation of cellular component organization	Biological Process,Biological Process,Biological Process,Molecular Function,Cellular Component,Biological Process,Biological Process,Biological Process	NA	NA	NA	NA	2.87685	0.26134	0.000264957	0.0229706
598	TR454945|c5_g1_i1	---NA---					NA	NA	NA	NA	1.94436	1.02238	0.000771595	0.039369
599	TR502742|c0_g1_i1	glycine-rich cell wall structural 1-like					NA	NA	NA	NA	3.94433	3.10081	1.33905e-06	0.00206341
600	TR510430|c0_g1_i1	---NA---					NA	NA	NA	NA	1.77025	0.511281	0.000649053	0.0358915
601	TR516979|c1_g1_i2	F-box only 9-like					NA	NA	NA	NA	-8.10362	0.662763	0.00010804	0.0145944
602	TR517004|c2_g2_i1	neuroglian-like isoform X2					NA	NA	NA	NA	3.86111	-0.149449	0.000255435	0.0226809
603	TR517142|c0_g1_i1	---NA---					NA	NA	NA	NA	4.51762	-0.252312	1.77894e-05	0.00621963
604	TR517305|c8_g1_i1	---NA---					NA	NA	NA	NA	-2.04877	0.998019	0.00122557	0.0487518
605	TR517480|c0_g1_i1	---NA---					NA	NA	NA	NA	4.32651	2.54503	1.64596e-06	0.00218913
606	TR517480|c0_g1_i2	---NA---					NA	NA	NA	NA	3.80047	1.58838	0.000222045	0.0212959
607	TR517480|c1_g1_i2	---NA---					NA	NA	NA	NA	4.96323	2.40076	1.62998e-06	0.00218913
608	TR517660|c6_g1_i1	---NA---					NA	NA	NA	NA	1.83151	3.29347	0.000165532	0.018799
609	TR517671|c2_g1_i6	---NA---					NA	NA	NA	NA	3.23498	1.97819	4.79925e-06	0.00341325
610	TR517682|c1_g1_i2	---NA---					NA	NA	NA	NA	-2.27989	1.64535	0.000278811	0.0236739
611	TR517696|c1_g1_i3	C-type lectin					NA	NA	NA	NA	7.25748	-0.616091	2.75921e-06	0.00283453
612	TR517737|c2_g1_i9	PREDICTED: RNA 3'-terminal phosphate cyclase	EC:6.5.1.4	GO:0003963,GO:0005524,GO:0005654,GO:0006396,GO:0044822	RNA-3'-phosphate cyclase activity,ATP binding,nucleoplasm,RNA processing,RNA binding	Molecular Function,Molecular Function,Cellular Component,Biological Process,Molecular Function	NA	NA	NA	NA	-7.93568	0.272429	8.49516e-05	0.0131123
613	TR517744|c3_g1_i3	sodium-dependent multivitamin transporter-like		GO:0015293,GO:0015718,GO:0016021,GO:0051180,GO:0051181,GO:0055085	symporter activity,monocarboxylic acid transport,integral component of membrane,vitamin transport,cofactor transport,transmembrane transport	Molecular Function,Biological Process,Cellular Component,Biological Process,Biological Process,Biological Process	NA	NA	NA	NA	3.58638	-0.524991	0.000682238	0.0368472
614	TR517834|c0_g8_i1	---NA---					NA	NA	NA	NA	-2.77112	-0.0496371	0.000829398	0.0409828
615	TR517836|c0_g1_i1	mediator of RNA polymerase II transcription subunit 15-like					NA	NA	NA	NA	4.92238	0.927235	3.29851e-06	0.00292124
617	TR518035|c4_g1_i1	---NA---					NA	NA	NA	NA	-2.33188	2.81697	0.00025844	0.0226809
618	TR518045|c1_g1_i1	lactase-phlorizin hydrolase					NA	NA	NA	NA	2.52696	2.07538	4.70882e-05	0.00975762
619	TR518066|c4_g2_i1	---NA---					NA	NA	NA	NA	-1.16174	5.04534	0.000441092	0.0298077
620	TR518112|c1_g2_i1	---NA---					NA	NA	NA	NA	5.19801	-0.47857	0.000288812	0.0242018
621	TR518112|c1_g2_i2	---NA---					NA	NA	NA	NA	3.08612	2.84303	1.33868e-06	0.00206341
622	TR518112|c1_g8_i1	---NA---					NA	NA	NA	NA	4.07697	-0.273391	0.000332134	0.0258595
623	TR518113|c0_g1_i1	neurofilament heavy polypeptide-like		GO:0016020	membrane	Cellular Component	NA	NA	NA	NA	9.17163	-0.259333	0.000576416	0.0340413
624	TR518227|c1_g4_i1	ADAM family mig-17	EC:3.4.24	GO:0004222,GO:0006508	metalloendopeptidase activity,proteolysis	Molecular Function,Biological Process	NA	NA	NA	NA	4.77583	1.40737	1.68434e-05	0.00613533
625	TR518229|c1_g2_i5	scavenger receptor class B					NA	NA	NA	NA	4.91375	-0.0774918	0.00125853	0.0493979
626	TR518233|c2_g2_i1	---NA---					NA	NA	NA	NA	1.91406	3.50375	7.79684e-05	0.0125733
627	TR518247|c2_g2_i3	UBA-like domain-containing 2-A-like isoform X1					NA	NA	NA	NA	1.74854	4.7636	1.09504e-06	0.00177473
628	TR518409|c2_g1_i4	myosin essential light chain		GO:0005509	calcium ion binding	Molecular Function	NA	NA	NA	NA	3.21991	5.17209	1.96168e-05	0.00649282
629	TR518409|c2_g4_i1	myosin essential light chain		GO:0005509,GO:0016459	calcium ion binding,myosin complex	Molecular Function,Cellular Component	NA	NA	NA	NA	3.37833	0.697909	0.00052702	0.0325809
630	TR518409|c2_g6_i1	myosin essential light striated adductor muscle-like					NA	NA	NA	NA	3.71229	3.31451	6.48461e-06	0.00400922
631	TR518435|c0_g1_i3	high-affinity choline transporter 1-like isoform X1					NA	NA	NA	NA	3.66397	0.354208	0.000265993	0.0230317
632	TR518539|c0_g1_i1	---NA---					NA	NA	NA	NA	-3.97516	-0.806403	0.000321761	0.025485
633	TR518718|c0_g1_i1	PREDICTED: uncharacterized protein LOC101856071					NA	NA	NA	NA	1.85557	2.30024	0.001282	0.0497963
634	TR518742|c2_g1_i1	---NA---					NA	NA	NA	NA	2.11742	0.576161	0.00130697	0.049979
635	TR518883|c2_g1_i3	---NA---					NA	NA	NA	NA	-1.83086	1.52273	0.000699473	0.0373725
636	TR518903|c1_g1_i5	---NA---					NA	NA	NA	NA	2.22493	1.37948	0.000923762	0.0433298
637	TR518945|c3_g1_i3	collagen alpha-1(IV) chain		GO:0005576,GO:0007275,GO:0044763	extracellular region,multicellular organism development,single-organism cellular process	Cellular Component,Biological Process,Biological Process	NA	NA	NA	NA	2.67055	2.74257	1.18989e-05	0.00515688
638	TR518966|c2_g2_i13	---NA---					NA	NA	NA	NA	1.57922	5.36194	0.000217487	0.021117
639	TR519232|c2_g3_i1	---NA---					NA	NA	NA	NA	-1.80396	4.18965	7.10834e-05	0.011873
640	TR519299|c1_g11_i4	---NA---					NA	NA	NA	NA	-1.86592	2.97825	0.000162645	0.01868
641	TR519428|c0_g2_i1	---NA---					NA	NA	NA	NA	1.6649	1.70263	0.000714045	0.0377247
642	TR519430|c1_g1_i1	ficolin 1					NA	NA	NA	NA	4.21744	-0.293068	0.000455815	0.0303412
643	TR519430|c1_g1_i2	tenascin- partial					NA	NA	NA	NA	3.02211	3.61229	2.3458e-05	0.00716903
644	TR519433|c1_g1_i2	---NA---					NA	NA	NA	NA	1.67932	2.69795	0.000330135	0.025859
645	TR519433|c1_g3_i5	---NA---					NA	NA	NA	NA	3.17159	2.71825	2.99981e-05	0.00786674
646	TR519511|c1_g1_i1	---NA---					NA	NA	NA	NA	-1.8167	3.62633	3.5135e-06	0.00301404
647	TR519525|c2_g3_i1	---NA---					NA	NA	NA	NA	1.93558	-0.403285	0.00112192	0.0468501
648	TR519557|c0_g2_i1	---NA---					NA	NA	NA	NA	-6.9943	0.679652	0.000486664	0.0313174
649	TR519563|c1_g1_i2	---NA---					NA	NA	NA	NA	-1.76472	6.5511	0.000619432	0.0351579
650	TR519583|c1_g2_i2	---NA---					NA	NA	NA	NA	-2.16047	2.68744	0.000311633	0.0251516
651	TR519593|c1_g1_i1	prosaposin-like isoform X1					NA	NA	NA	NA	1.85809	2.52153	0.00105991	0.0456739
652	TR519600|c3_g3_i2	trans-1,2-dihydrobenzene-1,2-diol dehydrogenase-like					NA	NA	NA	NA	7.79232	-0.615849	0.00090086	0.0427618
653	TR519728|c1_g1_i7	acetylcholine receptor subunit beta-like					NA	NA	NA	NA	5.78544	0.0365718	4.20001e-07	0.00105905
654	TR519844|c4_g1_i1	---NA---					NA	NA	NA	NA	-2.10707	1.62907	0.000117016	0.0154311
655	TR519942|c3_g1_i1	---NA---					NA	NA	NA	NA	-1.29563	5.56609	0.000742121	0.0385421
657	TR520062|c1_g4_i1	---NA---					NA	NA	NA	NA	-3.04739	0.523951	0.000331207	0.025859
658	TR520100|c5_g1_i2	Cell polarity alp11					NA	NA	NA	NA	2.71657	1.19126	0.00036457	0.0269895
659	TR520277|c0_g1_i1	---NA---					NA	NA	NA	NA	-1.65788	2.97507	0.000588271	0.0344083
660	TR520277|c0_g2_i1	---NA---					NA	NA	NA	NA	-1.96174	2.80836	0.000158	0.0184647
661	TR520346|c1_g1_i2	---NA---					NA	NA	NA	NA	-1.83988	0.743473	0.000973945	0.0441651
663	TR520381|c2_g1_i2	---NA---					NA	NA	NA	NA	-2.30799	0.316665	0.00124639	0.0491518
665	TR520416|c1_g3_i1	---NA---					NA	NA	NA	NA	-1.65035	2.33249	0.000426596	0.0294097
666	TR520416|c1_g3_i2	---NA---					NA	NA	NA	NA	-1.79572	2.89706	0.000205304	0.0204727
667	TR520419|c3_g2_i2	---NA---					NA	NA	NA	NA	8.50028	0.857148	0.000195569	0.0202652
668	TR520422|c4_g3_i1	pathogenesis-related leaf 4-like					NA	NA	NA	NA	3.88761	1.26205	8.19784e-05	0.0129511
669	TR520445|c4_g1_i7	---NA---					NA	NA	NA	NA	3.54489	-0.00986111	0.000651122	0.0358915
670	TR520483|c2_g1_i4	Phosphoglycerate mutase family member 5		GO:0016020	membrane	Cellular Component	NA	NA	NA	NA	-7.00275	-1.00324	0.000924404	0.0433355
671	TR520514|c1_g5_i5	---NA---					NA	NA	NA	NA	3.07457	-0.163694	4.18426e-05	0.00916253
672	TR520514|c1_g5_i7	---NA---					NA	NA	NA	NA	1.93416	1.67563	0.00095739	0.044014
673	TR520519|c2_g1_i1	---NA---					NA	NA	NA	NA	-2.51638	0.578442	0.000943026	0.0437647
674	TR520668|c0_g2_i1	cerebral peptide 1 precursor					NA	NA	NA	NA	1.71251	4.42642	1.14657e-05	0.00514965
675	TR520788|c0_g2_i3	phosphoglycolate phosphatase-like isoform X1	EC:3.1,EC:3.1.3.41	GO:0008152,GO:0016791	metabolic process,phosphatase activity	Biological Process,Molecular Function	NA	NA	NA	NA	-2.32623	1.50771	0.000248341	0.0223525
676	TR520860|c0_g1_i1	---NA---					NA	NA	NA	NA	-5.64075	0.0177445	9.36932e-06	0.00476007
678	TR520996|c2_g2_i4	PREDICTED: uncharacterized protein LOC101863667					NA	NA	NA	NA	2.13593	4.27975	0.000150244	0.0179111
679	TR521045|c0_g4_i1	---NA---					NA	NA	NA	NA	-3.21685	-0.313583	0.00109594	0.0464384
680	TR521046|c0_g2_i3	---NA---					NA	NA	NA	NA	1.39413	3.23051	0.00109765	0.0464384
681	TR521066|c0_g6_i2	---NA---					NA	NA	NA	NA	7.63905	-0.998033	0.00015335	0.0180975
682	TR521165|c0_g1_i3	---NA---					NA	NA	NA	NA	1.46914	3.35082	0.00105354	0.0455407
683	TR521241|c3_g1_i4	---NA---					NA	NA	NA	NA	1.78998	3.48044	6.71285e-05	0.0117349
684	TR521324|c4_g1_i6	---NA---					NA	NA	NA	NA	3.15188	1.32756	0.000243992	0.0222204
685	TR521327|c1_g1_i1	---NA---					NA	NA	NA	NA	-1.43135	5.64841	0.000557427	0.0334179
686	TR521329|c0_g1_i9	YTH domain-containing family 2					NA	NA	NA	NA	9.0633	1.40856	0.000179855	0.0194823
687	TR521334|c3_g4_i1	---NA---					NA	NA	NA	NA	-2.80216	-0.513338	0.000159735	0.018538
688	TR521345|c2_g1_i7	zinc metallo ase-disintegrin-like VLAIP-A					NA	NA	NA	NA	2.46276	2.25157	0.000488705	0.0313778
690	TR521378|c0_g1_i5	UNC93 MFSD11					NA	NA	NA	NA	4.15596	-0.580448	0.00109323	0.0463651
692	TR521615|c2_g1_i4	isoform A	EC:2.4.1,EC:2.4.1.41	GO:0004653,GO:0005488,GO:0005829,GO:0006493,GO:0016021,GO:0031985,GO:0032504	polypeptide N-acetylgalactosaminyltransferase activity,binding,cytosol,protein O-linked glycosylation,integral component of membrane,Golgi cisterna,multicellular organism reproduction	Molecular Function,Molecular Function,Cellular Component,Biological Process,Cellular Component,Cellular Component,Biological Process	NA	NA	NA	NA	5.65724	-1.03324	3.90035e-05	0.00876794
693	TR521619|c1_g1_i6	---NA---					NA	NA	NA	NA	-7.58881	0.735191	5.1181e-06	0.00351969
694	TR521634|c2_g2_i1	---NA---					NA	NA	NA	NA	-1.90158	2.52528	2.29128e-05	0.00710166
695	TR521636|c2_g1_i2	syntenin-1 isoform X1		GO:0044763	single-organism cellular process	Biological Process	NA	NA	NA	NA	1.65387	4.23595	0.000634781	0.0355456
696	TR521695|c2_g2_i2	---NA---					NA	NA	NA	NA	-7.0766	-0.216879	2.88542e-05	0.0077954
698	TR521711|c5_g1_i1	carbohydrate sulfotransferase 15-like					NA	NA	NA	NA	3.27588	-0.614741	0.000920377	0.0433176
699	TR521718|c0_g2_i1	---NA---					NA	NA	NA	NA	2.25375	-0.18034	0.00117537	0.0478124
700	TR521736|c1_g2_i3	electroneutral sodium bicarbonate exchanger 1-like isoform X1		GO:0005452,GO:0015698,GO:0016021,GO:0098656	inorganic anion exchanger activity,inorganic anion transport,integral component of membrane,anion transmembrane transport	Molecular Function,Biological Process,Cellular Component,Biological Process	NA	NA	NA	NA	2.30797	0.111692	0.00124522	0.0491303
701	TR521766|c1_g3_i1	---NA---					NA	NA	NA	NA	-5.23892	-0.669275	0.00104279	0.0454304
702	TR521777|c2_g1_i4	---NA---					NA	NA	NA	NA	6.74416	0.573943	1.82936e-07	0.000745172
703	TR521777|c3_g1_i8	fibrous sheath CABYR-binding -like					NA	NA	NA	NA	4.20064	0.466022	9.95109e-05	0.0140896
704	TR521785|c9_g4_i4	---NA---					NA	NA	NA	NA	-3.75856	-0.590668	9.73171e-05	0.0140151
705	TR521793|c2_g1_i2	cyclic AMP-responsive element-binding 3 3-B isoform X2		GO:0003700,GO:0030968,GO:0035497,GO:0043565,GO:0045944	transcription factor activity sequence-specific DNA binding,endoplasmic reticulum unfolded protein response,cAMP response element binding,sequence-specific DNA binding,positive regulation of transcription from RNA polymerase II promoter	Molecular Function,Biological Process,Molecular Function,Molecular Function,Biological Process	NA	NA	NA	NA	1.85417	2.55077	0.000491791	0.0314304
706	TR521802|c2_g6_i5	---NA---					NA	NA	NA	NA	-1.67953	2.1262	0.00124872	0.0491518
708	TR521911|c3_g2_i4	microtubule-associated futsch-like isoform X5					NA	NA	NA	NA	1.96849	1.77097	9.42085e-05	0.0138014
709	TR522018|c3_g1_i1	annexin B11-like isoform X2		GO:0005488	binding	Molecular Function	NA	NA	NA	NA	1.7191	3.17534	0.000332524	0.0258595
710	TR522109|c3_g1_i1	---NA---					NA	NA	NA	NA	-3.70184	-0.019646	0.000157616	0.0184464
713	TR522198|c1_g1_i1	---NA---					NA	NA	NA	NA	-2.78346	-0.0995017	0.000745944	0.0386252
714	TR522198|c1_g1_i2	---NA---					NA	NA	NA	NA	-1.55212	3.03774	0.000838885	0.0412915
715	TR522208|c0_g1_i2	PREDICTED: uncharacterized protein LOC101859417					NA	NA	NA	NA	4.29385	-0.596571	0.00127324	0.0497172
716	TR522208|c0_g1_i3	PREDICTED: uncharacterized protein LOC101859417					NA	NA	NA	NA	1.67455	3.6036	0.000102102	0.0142335
717	TR522290|c0_g1_i1	---NA---					NA	NA	NA	NA	5.02849	-0.303478	0.000166076	0.0188274
718	TR522307|c2_g2_i1	---NA---					NA	NA	NA	NA	-1.59928	3.37945	0.000653454	0.0359145
719	TR522330|c1_g1_i1	PREDICTED: uncharacterized protein LOC101854772 isoform X4					NA	NA	NA	NA	3.19341	0.657019	0.000615425	0.0351132
720	TR522369|c2_g1_i1	organic cation transporter -like		GO:0005215,GO:0016020	transporter activity,membrane	Molecular Function,Cellular Component	NA	NA	NA	NA	2.55174	0.798899	6.76537e-05	0.0117773
721	TR522405|c2_g4_i3	gelsolin 2					NA	NA	NA	NA	1.31449	5.12102	0.000341181	0.0263056
723	TR522505|c0_g1_i1	---NA---					NA	NA	NA	NA	-1.16183	3.09002	0.00114267	0.0471262
725	TR522679|c2_g1_i1	methyltransferase NSUN6 isoform X1					NA	NA	NA	NA	-7.17297	0.129556	2.72245e-07	0.000943906
728	TR522989|c1_g1_i2	---NA---					NA	NA	NA	NA	2.78927	-0.603091	0.000750533	0.0387183
729	TR523068|c3_g2_i1	---NA---					NA	NA	NA	NA	-2.13868	1.44819	0.000330512	0.025859
730	TR523068|c3_g7_i1	---NA---					NA	NA	NA	NA	-2.62552	0.864568	9.08807e-05	0.0136257
731	TR523262|c0_g1_i2	---NA---					NA	NA	NA	NA	4.94899	-0.58204	0.000428919	0.0294374
732	TR523463|c1_g1_i2	---NA---					NA	NA	NA	NA	5.32585	-0.861561	0.000274978	0.023492
733	TR523471|c2_g2_i3	Follistatin-related 3					NA	NA	NA	NA	1.89659	0.905772	0.000785328	0.0398297
734	TR523482|c1_g4_i2	---NA---					NA	NA	NA	NA	-2.42093	2.07881	0.000196756	0.0202652
735	TR523592|c1_g2_i1	---NA---					NA	NA	NA	NA	-1.63438	2.46284	0.00121172	0.0483588
736	TR523598|c0_g1_i2	neuroglian-like isoform X2					NA	NA	NA	NA	3.15018	0.099151	0.000650915	0.0358915
739	TR523631|c1_g1_i5	sodium-dependent proline transporter-like		GO:0005328,GO:0006836,GO:0016021,GO:0055085	neurotransmitter:sodium symporter activity,neurotransmitter transport,integral component of membrane,transmembrane transport	Molecular Function,Biological Process,Cellular Component,Biological Process	NA	NA	NA	NA	1.78555	1.56142	0.000592194	0.0344419
740	TR523631|c2_g2_i2	sodium-dependent proline transporter-like isoform X1		GO:0005328,GO:0006836,GO:0016021,GO:0055085	neurotransmitter:sodium symporter activity,neurotransmitter transport,integral component of membrane,transmembrane transport	Molecular Function,Biological Process,Cellular Component,Biological Process	NA	NA	NA	NA	4.81382	-0.455592	0.000330971	0.025859
741	TR523631|c2_g2_i3	sodium-dependent proline transporter-like isoform X1		GO:0005328,GO:0006836,GO:0016021,GO:0055085	neurotransmitter:sodium symporter activity,neurotransmitter transport,integral component of membrane,transmembrane transport	Molecular Function,Biological Process,Cellular Component,Biological Process	NA	NA	NA	NA	2.1769	2.82191	3.18516e-06	0.00292124
743	TR523661|c4_g1_i2	---NA---					NA	NA	NA	NA	2.83594	1.73623	0.000119705	0.0156117
744	TR523668|c2_g1_i1	---NA---					NA	NA	NA	NA	3.49791	4.15303	7.4473e-09	0.000123939
745	TR523668|c2_g1_i7	---NA---					NA	NA	NA	NA	3.8193	0.0300916	0.000405808	0.0286879
746	TR523841|c0_g1_i1	kelch 24					NA	NA	NA	NA	1.79225	2.75844	9.33266e-05	0.0137205
747	TR523852|c1_g2_i3	---NA---					NA	NA	NA	NA	-1.82969	3.19424	0.000962824	0.0440734
749	TR523916|c1_g4_i1	carboxypeptidase E	EC:3.4.17	GO:0004181,GO:0006508,GO:0008270,GO:0012505,GO:0043231,GO:0044444	metallocarboxypeptidase activity,proteolysis,zinc ion binding,endomembrane system,intracellular membrane-bounded organelle,cytoplasmic part	Molecular Function,Biological Process,Molecular Function,Cellular Component,Cellular Component,Cellular Component	NA	NA	NA	NA	1.20511	4.42402	0.000989013	0.044557
750	TR523958|c1_g2_i3	---NA---					NA	NA	NA	NA	3.01929	0.648365	0.000328917	0.025859
752	TR524154|c0_g1_i2	---NA---					NA	NA	NA	NA	3.75045	-0.605399	0.000413342	0.0288727
753	TR524177|c1_g5_i1	calpain-B-like isoform X15					NA	NA	NA	NA	1.64293	2.78684	0.000725792	0.0381515
754	TR524377|c4_g2_i1	DNA-directed RNA polymerase III subunit RPC10	EC:2.7.7.6	GO:0001056,GO:0003676,GO:0005666,GO:0005730,GO:0006386,GO:0008270	RNA polymerase III activity,nucleic acid binding,DNA-directed RNA polymerase III complex,nucleolus,termination of RNA polymerase III transcription,zinc ion binding	Molecular Function,Molecular Function,Cellular Component,Cellular Component,Biological Process,Molecular Function	NA	NA	NA	NA	5.92518	-0.51238	0.000329353	0.025859
755	TR524390|c1_g2_i3	---NA---					NA	NA	NA	NA	-2.02084	2.73639	0.00116408	0.0475359
757	TR524432|c1_g1_i1	Hemicentin- partial					NA	NA	NA	NA	2.10995	1.21811	0.000628242	0.0354418
758	TR524641|c0_g1_i5	C-type lectin					NA	NA	NA	NA	7.64102	-0.697449	0.000100212	0.0141182
759	TR525023|c0_g2_i2	UPF0547 C16orf87 homolog					NA	NA	NA	NA	-7.60051	0.520302	0.000474863	0.0310156
761	TR525103|c2_g1_i1	---NA---					NA	NA	NA	NA	1.62887	2.17785	0.00124388	0.0491303
762	TR525103|c2_g4_i2	tolloid partial		GO:0016787	hydrolase activity	Molecular Function	NA	NA	NA	NA	3.01292	0.144617	0.00103092	0.0453586
763	TR525103|c2_g4_i3	cubilin isoform X2					NA	NA	NA	NA	2.95263	0.526577	0.000459496	0.0304815
764	TR525196|c3_g3_i1	integral membrane 2A-like isoform X2					NA	NA	NA	NA	1.58342	4.64878	0.00014748	0.0176574
765	TR525375|c1_g1_i2	---NA---					NA	NA	NA	NA	3.86334	0.449044	0.0006816	0.0368472
766	TR525375|c2_g1_i2	---NA---					NA	NA	NA	NA	3.74579	0.190437	4.63947e-05	0.00971104
767	TR525376|c5_g1_i3	---NA---					NA	NA	NA	NA	1.72077	1.46474	0.000845758	0.0415059
768	TR525407|c0_g4_i1	---NA---					NA	NA	NA	NA	4.55942	-0.476668	0.00129119	0.0497963
769	TR525436|c0_g1_i1	synaptotagmin 4		GO:0005515,GO:0016021,GO:0016192,GO:0044464,GO:0044763,GO:0065007	protein binding,integral component of membrane,vesicle-mediated transport,cell part,single-organism cellular process,biological regulation	Molecular Function,Cellular Component,Biological Process,Cellular Component,Biological Process,Biological Process	NA	NA	NA	NA	2.25146	1.07292	0.0005235	0.0324422
770	TR525469|c0_g1_i5	inter-alpha-trypsin inhibitor heavy chain H3-like					NA	NA	NA	NA	3.31211	1.76787	0.00128643	0.0497963
771	TR525469|c0_g1_i6	inter-alpha-trypsin inhibitor heavy chain H3-like					NA	NA	NA	NA	9.14374	0.301752	1.3876e-06	0.00209934
772	TR525487|c5_g2_i2	hypothetical protein LOTGIDRAFT_238269		GO:0016021	integral component of membrane	Cellular Component	NA	NA	NA	NA	2.27119	1.16592	6.75678e-05	0.0117773
773	TR525493|c0_g1_i1	hypothetical protein EMIHUDRAFT_111321					NA	NA	NA	NA	-2.54276	-0.159044	0.000492494	0.0314347
774	TR525508|c0_g2_i3	hypothetical protein					NA	NA	NA	NA	4.78296	0.294511	0.000246426	0.0223488
775	TR525512|c0_g1_i3	Dual specificity phosphatase 3	EC:3.1.3.16,EC:3.1,EC:3.1.3.41	GO:0004721,GO:0006470,GO:0043227,GO:0043409,GO:0044424	phosphoprotein phosphatase activity,protein dephosphorylation,membrane-bounded organelle,negative regulation of MAPK cascade,intracellular part	Molecular Function,Biological Process,Cellular Component,Biological Process,Cellular Component	NA	NA	NA	NA	2.28506	2.11634	0.0011997	0.0482027
776	TR525539|c0_g3_i1	---NA---					NA	NA	NA	NA	2.74574	-0.143201	0.00013925	0.0170902
777	TR525624|c1_g2_i1	collagen alpha-6(VI) chain-like					NA	NA	NA	NA	3.82981	5.07419	4.86175e-05	0.00986192
778	TR525624|c1_g2_i2	collagen alpha-1(XII) chain isoform X1					NA	NA	NA	NA	5.14468	0.622086	9.45815e-07	0.00167452
779	TR525838|c2_g2_i1	---NA---					NA	NA	NA	NA	4.78951	-0.787545	0.000111044	0.0149034
780	TR526049|c1_g2_i1	---NA---					NA	NA	NA	NA	-1.82936	1.09015	0.000517948	0.0323488
782	TR526326|c0_g1_i1	---NA---					NA	NA	NA	NA	-1.11638	4.75516	0.00103492	0.0453978
783	TR526367|c3_g1_i3	calcium-dependent cysteine	EC:3.4	GO:0005622,GO:0008234,GO:0046872	intracellular,cysteine-type peptidase activity,metal ion binding	Cellular Component,Molecular Function,Molecular Function	NA	NA	NA	NA	-4.0271	0.238496	0.00041669	0.0289667
784	TR526417|c2_g1_i2	4-aminobutyrate aminotransferase, mitochondrial	EC:2.6.1.19	GO:0003867,GO:0009448,GO:0016021,GO:0030170	4-aminobutyrate transaminase activity,gamma-aminobutyric acid metabolic process,integral component of membrane,pyridoxal phosphate binding	Molecular Function,Biological Process,Cellular Component,Molecular Function	NA	NA	NA	NA	2.37736	5.11533	1.3351e-05	0.00547628
785	TR526417|c2_g1_i6	4-aminobutyrate mitochondrial-like		GO:0008483	transaminase activity	Molecular Function	NA	NA	NA	NA	1.35728	5.99377	0.00106839	0.0458255
786	TR526424|c3_g1_i2	peptidase inhibitor 16-like					NA	NA	NA	NA	2.52687	0.571855	0.0012257	0.0487518
787	TR526424|c3_g1_i3	peptidase inhibitor 16-like					NA	NA	NA	NA	2.18922	2.44813	0.000201034	0.0203181
788	TR526424|c3_g2_i2	peptidase inhibitor 16-like					NA	NA	NA	NA	3.08999	0.973987	7.28947e-05	0.0120112
789	TR526424|c3_g3_i2	---NA---					NA	NA	NA	NA	4.8653	0.62911	1.56558e-05	0.00587638
790	TR526425|c1_g2_i1	PREDICTED: uncharacterized protein LOC101861674					NA	NA	NA	NA	1.59239	3.10096	0.000346239	0.0264969
791	TR526819|c3_g2_i1	UBX domain-containing 1					NA	NA	NA	NA	-1.62637	3.86531	0.000347957	0.0265145
792	TR526821|c2_g1_i2	tubulin beta-2C chain		GO:0005200,GO:0005525,GO:0005874,GO:0007017	structural constituent of cytoskeleton,GTP binding,microtubule,microtubule-based process	Molecular Function,Molecular Function,Cellular Component,Biological Process	NA	NA	NA	NA	-1.29733	11.1849	0.000988102	0.0445401
793	TR526826|c2_g3_i1	---NA---					NA	NA	NA	NA	4.11549	-0.427156	6.06411e-06	0.00388154
794	TR526826|c2_g3_i4	---NA---					NA	NA	NA	NA	2.96765	-0.561211	0.000352145	0.0266325
795	TR526858|c2_g5_i1	sodium glucose cotransporter 1		GO:0005887,GO:0015293,GO:0055085	integral component of plasma membrane,symporter activity,transmembrane transport	Cellular Component,Molecular Function,Biological Process	NA	NA	NA	NA	2.69444	0.819252	9.9043e-07	0.00168987
796	TR526891|c2_g3_i2	---NA---					NA	NA	NA	NA	5.67476	-0.65541	0.00020263	0.020339
797	TR526920|c2_g2_i3	myosin heavy chain isoform partial	EC:3.6.1,EC:3.6.1.15	GO:0003774,GO:0016459	motor activity,myosin complex	Molecular Function,Cellular Component	NA	NA	NA	NA	5.16446	-1.153	0.00017504	0.0193173
798	TR526990|c3_g5_i2	---NA---					NA	NA	NA	NA	2.83586	0.557298	0.00127502	0.0497635
800	TR527188|c0_g2_i1	kinase C-binding NELL1-like					NA	NA	NA	NA	2.54593	-0.2035	0.00129262	0.0497963
801	TR527223|c1_g3_i3	singed- partial		GO:0003779,GO:0044424	actin binding,intracellular part	Molecular Function,Cellular Component	NA	NA	NA	NA	4.75443	-0.0973985	6.24434e-05	0.0112902
802	TR527251|c6_g4_i1	---NA---					NA	NA	NA	NA	2.56778	-0.33694	0.00121747	0.0485118
803	TR527314|c6_g3_i3	---NA---					NA	NA	NA	NA	-4.12953	-0.179716	0.000666638	0.0362323
804	TR527449|c0_g1_i1	---NA---					NA	NA	NA	NA	3.20204	0.565438	0.000221197	0.0212959
805	TR527537|c4_g2_i1	tubulin alpha chain-like	EC:3.6.1,EC:3.6.1.15	GO:0003924,GO:0005200,GO:0005525,GO:0005737,GO:0005874,GO:0007017	GTPase activity,structural constituent of cytoskeleton,GTP binding,cytoplasm,microtubule,microtubule-based process	Molecular Function,Molecular Function,Molecular Function,Cellular Component,Cellular Component,Biological Process	NA	NA	NA	NA	1.29953	2.0709	0.00105626	0.045628
806	TR527642|c2_g1_i4	homer homolog 2-like isoform X9					NA	NA	NA	NA	2.23116	0.361641	0.000768304	0.0393182
807	TR527679|c0_g1_i1	---NA---					NA	NA	NA	NA	3.80543	5.7329	3.07872e-06	0.00292124
808	TR527679|c0_g1_i3	---NA---					NA	NA	NA	NA	3.98105	1.96076	8.41367e-05	0.0130903
809	TR527679|c0_g1_i5	---NA---					NA	NA	NA	NA	6.45964	0.810132	6.05618e-05	0.0110567
810	TR527679|c0_g1_i6	---NA---					NA	NA	NA	NA	3.3489	3.30631	7.20243e-05	0.0119149
811	TR527679|c0_g1_i8	---NA---					NA	NA	NA	NA	4.06304	3.63432	0.000987998	0.0445401
812	TR527679|c0_g2_i1	---NA---					NA	NA	NA	NA	3.90288	-0.454671	0.000439937	0.029801
814	TR527909|c1_g1_i2	Testin					NA	NA	NA	NA	3.81439	-0.434214	0.000621099	0.035182
815	TR527909|c1_g2_i1	---NA---					NA	NA	NA	NA	7.60713	-0.507324	1.33071e-08	0.000138412
817	TR528061|c1_g5_i1	neurogenic locus notch homolog 2-like					NA	NA	NA	NA	3.51289	2.42556	0.000222221	0.0212959
818	TR528098|c0_g1_i1	Glutamine-rich 2		GO:0007165,GO:0008168,GO:0016020,GO:0016310,GO:0016772,GO:0032259,GO:0044238,GO:0071704	signal transduction,methyltransferase activity,membrane,phosphorylation,transferase activity transferring phosphorus-containing groups,methylation,primary metabolic process,organic substance metabolic process	Biological Process,Molecular Function,Cellular Component,Biological Process,Molecular Function,Biological Process,Biological Process,Biological Process	NA	NA	NA	NA	4.57667	0.646349	0.000281939	0.0237936
819	TR528098|c0_g1_i2	Glutamine-rich 2		GO:0007165,GO:0008168,GO:0016020,GO:0016310,GO:0016772,GO:0032259	signal transduction,methyltransferase activity,membrane,phosphorylation,transferase activity transferring phosphorus-containing groups,methylation	Biological Process,Molecular Function,Cellular Component,Biological Process,Molecular Function,Biological Process	NA	NA	NA	NA	7.27613	-1.3211	0.00116172	0.0474792
820	TR528098|c2_g1_i1	---NA---					NA	NA	NA	NA	7.48304	-0.497788	0.000892375	0.0426265
822	TR528378|c0_g1_i1	---NA---					NA	NA	NA	NA	2.47367	-0.3839	0.000295578	0.02462
823	TR528425|c1_g1_i1	neurogenic differentiation factor 1-like		GO:0000122,GO:0000977,GO:0001227,GO:0005634,GO:0033504,GO:0046983,GO:0050767	negative regulation of transcription from RNA polymerase II promoter,RNA polymerase II regulatory region sequence-specific DNA binding,transcriptional repressor activity RNA polymerase II transcription regulatory region sequence-specific binding,nucleus,floor plate development,protein dimerization activity,regulation of neurogenesis	Biological Process,Molecular Function,Molecular Function,Cellular Component,Biological Process,Molecular Function,Biological Process	NA	NA	NA	NA	1.57342	3.71687	0.00129174	0.0497963
824	TR528435|c1_g2_i2	PREDICTED: uncharacterized protein LOC101851600					NA	NA	NA	NA	4.789	1.08225	3.27577e-05	0.0081125
825	TR528443|c1_g1_i1	---NA---					NA	NA	NA	NA	-9.892	2.03509	7.63779e-05	0.0123648
826	TR528472|c1_g1_i1	---NA---					NA	NA	NA	NA	-1.00182	4.16544	0.000804503	0.0403103
827	TR528615|c3_g1_i2	---NA---					NA	NA	NA	NA	3.65999	-0.392265	0.00109322	0.0463651
828	TR528654|c1_g1_i1	---NA---					NA	NA	NA	NA	3.9114	-0.139782	0.000393021	0.0281201
829	TR528734|c3_g2_i2	myosin heavy chain isoform A	EC:3.6.1,EC:3.6.1.15	GO:0003774,GO:0003779,GO:0005524,GO:0016459	motor activity,actin binding,ATP binding,myosin complex	Molecular Function,Molecular Function,Molecular Function,Cellular Component	NA	NA	NA	NA	3.7389	-1.22206	0.00130323	0.0498817
830	TR528734|c3_g4_i2	myosin heavy chain	EC:3.6.1,EC:3.6.1.15	GO:0003774,GO:0003779,GO:0005516,GO:0005524,GO:0030016,GO:0032982	motor activity,actin binding,calmodulin binding,ATP binding,myofibril,myosin filament	Molecular Function,Molecular Function,Molecular Function,Molecular Function,Cellular Component,Cellular Component	NA	NA	NA	NA	4.59465	-0.274383	0.000740034	0.0385109
831	TR528954|c3_g2_i1	ase inhibitor I25 and ase inhibitor I29 and Peptidase C1A domain containing		GO:0008233,GO:0010466,GO:0030414	peptidase activity,negative regulation of peptidase activity,peptidase inhibitor activity	Molecular Function,Biological Process,Molecular Function	NA	NA	NA	NA	1.10046	3.97349	0.00126845	0.0496234
832	TR529002|c3_g3_i1	calcineurin B homologous 1		GO:0005509	calcium ion binding	Molecular Function	NA	NA	NA	NA	1.28211	5.23606	0.000665999	0.0362212
833	TR529104|c2_g2_i1	---NA---					NA	NA	NA	NA	4.59352	-0.760655	0.000180194	0.0194823
834	TR529115|c3_g4_i1	Cyclic AMP-responsive element-binding 3 2		GO:0003700,GO:0016021,GO:0030968,GO:0035497,GO:0043565,GO:0045944	transcription factor activity sequence-specific DNA binding,integral component of membrane,endoplasmic reticulum unfolded protein response,cAMP response element binding,sequence-specific DNA binding,positive regulation of transcription from RNA polymerase II promoter	Molecular Function,Cellular Component,Biological Process,Molecular Function,Molecular Function,Biological Process	NA	NA	NA	NA	6.84472	-1.22523	0.000209529	0.0206947
835	TR529124|c1_g4_i4	matrix metallo ase		GO:0008233,GO:0046872	peptidase activity,metal ion binding	Molecular Function,Molecular Function	NA	NA	NA	NA	7.58579	-0.881164	0.000956253	0.0439861
836	TR529241|c1_g2_i1	Calpain-5	EC:3.4	GO:0008234	cysteine-type peptidase activity	Molecular Function	NA	NA	NA	NA	5.88212	-0.742168	0.0010983	0.0464384
837	TR529293|c0_g1_i1	---NA---					NA	NA	NA	NA	2.58258	6.54846	0.000129577	0.0162383
838	TR529295|c0_g1_i1	prolyl 4-hydroxylase subunit alpha-2 isoform X1					NA	NA	NA	NA	2.2791	4.06142	5.22764e-05	0.0102807
839	TR529305|c4_g1_i9	N-acetyltransferase 6					NA	NA	NA	NA	-3.30868	0.202921	0.000862742	0.0418981
840	TR529339|c5_g6_i2	Tubulin alpha-1C partial	EC:3.6.1,EC:3.6.1.15	GO:0003924,GO:0005200,GO:0005525,GO:0005737,GO:0005874,GO:0007017	GTPase activity,structural constituent of cytoskeleton,GTP binding,cytoplasm,microtubule,microtubule-based process	Molecular Function,Molecular Function,Molecular Function,Cellular Component,Cellular Component,Biological Process	NA	NA	NA	NA	1.50797	3.04338	0.00061933	0.0351579
841	TR529343|c0_g1_i1	HEAT repeat-containing 6-like					NA	NA	NA	NA	-1.46262	5.48405	7.32191e-05	0.0120229
842	TR529370|c2_g1_i3	---NA---					NA	NA	NA	NA	8.81608	0.544122	0.00101781	0.0450735
843	TR529374|c2_g1_i2	---NA---					NA	NA	NA	NA	1.90426	3.41072	0.00012239	0.0157407
844	TR529381|c1_g1_i1	---NA---					NA	NA	NA	NA	2.65084	1.56127	0.00114371	0.0471262
845	TR529381|c1_g2_i1	---NA---					NA	NA	NA	NA	2.68905	2.95331	0.000303002	0.0248236
846	TR529381|c1_g3_i1	ADAM family mig-17					NA	NA	NA	NA	2.91702	3.63111	3.32563e-05	0.00813909
847	TR529381|c1_g3_i2	ADAM family mig-17					NA	NA	NA	NA	3.47456	1.64955	0.000226779	0.0214681
848	TR529383|c0_g3_i10	macrophage-expressed gene 1 -like					NA	NA	NA	NA	8.26104	0.469955	7.22807e-05	0.0119336
849	TR529560|c1_g3_i1	dual oxidase 2-like	EC:1.11.1.7	GO:0004601,GO:0005509,GO:0006979,GO:0016021,GO:0019221,GO:0020037,GO:0042335,GO:0051591,GO:0055114,GO:0098869	peroxidase activity,calcium ion binding,response to oxidative stress,integral component of membrane,cytokine-mediated signaling pathway,heme binding,cuticle development,response to cAMP,oxidation-reduction process,cellular oxidant detoxification	Molecular Function,Molecular Function,Biological Process,Cellular Component,Biological Process,Molecular Function,Biological Process,Biological Process,Biological Process,Biological Process	NA	NA	NA	NA	2.01841	2.05366	7.99397e-05	0.012743
850	TR529609|c7_g1_i1	---NA---					NA	NA	NA	NA	-2.16435	1.32235	0.00108946	0.0463096
851	TR529654|c2_g3_i2	---NA---					NA	NA	NA	NA	6.10744	-0.340011	0.00120369	0.0483164
852	TR529672|c1_g3_i1	---NA---					NA	NA	NA	NA	1.99862	2.35341	0.00078517	0.0398297
853	TR529746|c0_g1_i1	---NA---					NA	NA	NA	NA	-1.9108	2.75285	0.000406388	0.0286879
854	TR529780|c0_g1_i2	---NA---					NA	NA	NA	NA	-4.51727	0.522121	0.000812762	0.0404248
855	TR529784|c2_g3_i5	transmembrane 116-like					NA	NA	NA	NA	3.68215	0.201432	1.92665e-05	0.00647266
856	TR529937|c1_g1_i3	glyco -N-acetylgalactosamine 3-beta-galactosyltransferase 1-like		GO:0016740	transferase activity	Molecular Function	NA	NA	NA	NA	3.70501	0.343503	0.000352814	0.0266388
857	TR529937|c1_g1_i4	glyco -N-acetylgalactosamine 3-beta-galactosyltransferase 1-like		GO:0016740	transferase activity	Molecular Function	NA	NA	NA	NA	4.65272	-0.615944	8.43852e-06	0.00451854
858	TR530066|c0_g1_i1	---NA---					NA	NA	NA	NA	-1.91696	3.11533	6.37527e-05	0.0114084
859	TR530077|c0_g1_i1	---NA---					NA	NA	NA	NA	-1.27825	6.72566	0.00016551	0.018799
860	TR530139|c4_g1_i1	chitinase -like isoform X1					NA	NA	NA	NA	3.55512	1.45704	0.000244839	0.0222416
862	TR530206|c0_g1_i1	---NA---					NA	NA	NA	NA	-1.71171	6.43316	0.000530091	0.0326316
863	TR530206|c0_g2_i1	---NA---					NA	NA	NA	NA	-3.37263	0.257339	0.00106272	0.0457455
864	TR530206|c0_g3_i2	outer dense fiber 3-like					NA	NA	NA	NA	-4.77897	1.8381	0.000150846	0.0179314
865	TR530215|c0_g1_i2	---NA---					NA	NA	NA	NA	6.25512	-0.605179	0.000296503	0.0246477
866	TR530233|c1_g13_i1	---NA---					NA	NA	NA	NA	-2.40777	1.07104	0.00126544	0.0495358
867	TR530235|c3_g2_i2	---NA---					NA	NA	NA	NA	-1.64602	2.89755	0.000593134	0.0344419
868	TR530240|c3_g2_i3	hypothetical protein LOTGIDRAFT_235406					NA	NA	NA	NA	2.74684	1.17809	8.04708e-05	0.012795
869	TR530365|c0_g1_i4	---NA---					NA	NA	NA	NA	2.40416	0.627137	0.000749384	0.038683
870	TR530442|c2_g2_i1	small heat shock p36-like					NA	NA	NA	NA	3.73126	-0.317925	0.000308205	0.0250024
871	TR530504|c1_g1_i1	---NA---					NA	NA	NA	NA	2.22869	0.857152	0.000167902	0.0188875
872	TR530519|c4_g1_i1	acyl- -binding		GO:0000062,GO:0012505,GO:0043231,GO:0044444	fatty-acyl-CoA binding,endomembrane system,intracellular membrane-bounded organelle,cytoplasmic part	Molecular Function,Cellular Component,Cellular Component,Cellular Component	NA	NA	NA	NA	9.82496	2.84079	0.000554123	0.0332918
873	TR530528|c1_g1_i1	tripartite motif-containing 3-like isoform X1					NA	NA	NA	NA	1.78444	1.36668	0.000784733	0.0398297
874	TR530551|c0_g1_i1	PREDICTED: uncharacterized protein LOC101848295					NA	NA	NA	NA	3.866	2.83258	2.3634e-05	0.00716903
875	TR530587|c0_g3_i5	PREDICTED: uncharacterized protein LOC101863645					NA	NA	NA	NA	2.45719	-0.287826	0.000728841	0.0382506
877	TR530734|c0_g3_i4	---NA---					NA	NA	NA	NA	4.66755	0.262938	2.76762e-05	0.00765599
878	TR530763|c1_g1_i2	Calcium-dependent protein kinase isoform 2		GO:0005509,GO:0016301,GO:0016310	calcium ion binding,kinase activity,phosphorylation	Molecular Function,Molecular Function,Biological Process	NA	NA	NA	NA	3.45665	0.638077	7.07959e-05	0.011873
880	TR530876|c0_g1_i1	---NA---					NA	NA	NA	NA	-2.40757	-0.0830499	0.000894343	0.0426486
881	TR531109|c3_g4_i3	beta-1,3-galactosyltransferase 1- partial					NA	NA	NA	NA	5.82554	-0.464751	0.000229946	0.021596
882	TR531191|c1_g3_i1	---NA---					NA	NA	NA	NA	3.79653	-0.105663	0.000179416	0.0194823
883	TR531191|c1_g3_i6	---NA---					NA	NA	NA	NA	2.26465	1.46879	0.000755267	0.0389143
884	TR531195|c2_g2_i1	Ankyrin repeat and FYVE domain-containing 1		GO:0005768,GO:0016020,GO:0016192,GO:0046872,GO:0051641	endosome,membrane,vesicle-mediated transport,metal ion binding,cellular localization	Cellular Component,Cellular Component,Biological Process,Molecular Function,Biological Process	NA	NA	NA	NA	1.71991	2.3977	0.000355961	0.0267328
885	TR531209|c4_g1_i5	---NA---					NA	NA	NA	NA	-1.48521	4.73837	0.00108039	0.0461651
886	TR531225|c1_g2_i1	---NA---					NA	NA	NA	NA	2.03399	0.428235	0.00114714	0.0472263
887	TR531228|c4_g4_i1	---NA---					NA	NA	NA	NA	-1.96511	0.881119	0.00106663	0.0458255
888	TR531260|c2_g1_i1	---NA---					NA	NA	NA	NA	4.52604	0.886671	0.000376228	0.0274136
889	TR531263|c2_g4_i1	---NA---					NA	NA	NA	NA	-2.00037	0.0487638	0.000548551	0.0331071
890	TR531264|c2_g2_i1	---NA---					NA	NA	NA	NA	-1.12032	3.50859	0.000648747	0.0358915
891	TR531284|c1_g2_i9	beta,beta-carotene 15,15 -monooxygenase-like					NA	NA	NA	NA	8.23223	0.827755	0.00100648	0.0447862
892	TR531503|c0_g1_i3	heme-binding 2					NA	NA	NA	NA	1.84519	2.34265	0.000113617	0.0151063
893	TR531503|c0_g4_i4	---NA---					NA	NA	NA	NA	3.63802	-0.761767	0.000734357	0.0384076
896	TR531538|c5_g2_i2	taurine transporter		GO:0005328,GO:0005622,GO:0006836,GO:0016021,GO:0055085	neurotransmitter:sodium symporter activity,intracellular,neurotransmitter transport,integral component of membrane,transmembrane transport	Molecular Function,Cellular Component,Biological Process,Cellular Component,Biological Process	NA	NA	NA	NA	1.46036	4.82211	0.000176653	0.0193924
898	TR531694|c4_g1_i1	---NA---					NA	NA	NA	NA	-2.21386	0.824893	1.7691e-05	0.00621133
900	TR531885|c6_g2_i1	---NA---					NA	NA	NA	NA	-3.41495	-0.0166396	0.000951199	0.0438992
901	TR531996|c0_g1_i2	hypothetical protein BRAFLDRAFT_87343		GO:0005576,GO:0010466,GO:0030414	extracellular region,negative regulation of peptidase activity,peptidase inhibitor activity	Cellular Component,Biological Process,Molecular Function	NA	NA	NA	NA	3.34984	-0.700338	0.00112892	0.0469459
902	TR532203|c3_g2_i3	ufm1-specific protease 1-like		GO:0008233	peptidase activity	Molecular Function	NA	NA	NA	NA	-5.19321	-0.365704	0.000325934	0.0257074
905	TR532401|c2_g4_i6	---NA---					NA	NA	NA	NA	3.20959	0.701116	0.000729101	0.0382506
906	TR532415|c2_g1_i2	---NA---					NA	NA	NA	NA	2.52411	-0.625546	0.000573533	0.0339126
907	TR532472|c0_g1_i1	store-operated calcium entry-associated regulatory factor-like		GO:0030176,GO:2001256	integral component of endoplasmic reticulum membrane,regulation of store-operated calcium entry	Cellular Component,Biological Process	NA	NA	NA	NA	5.1087	0.573257	0.000299468	0.0246664
908	TR532472|c0_g1_i2	store-operated calcium entry-associated regulatory factor-like		GO:0016021	integral component of membrane	Cellular Component	NA	NA	NA	NA	2.41067	1.36287	0.000479328	0.0310678
909	TR532480|c0_g1_i2	---NA---					NA	NA	NA	NA	3.87644	-0.708672	0.00119579	0.0481386
910	TR532482|c1_g5_i1	---NA---					NA	NA	NA	NA	-2.78311	0.979415	0.000664818	0.0362043
911	TR532490|c1_g1_i2	---NA---					NA	NA	NA	NA	7.77275	0.172833	5.40145e-07	0.00114306
912	TR532549|c1_g3_i8	---NA---					NA	NA	NA	NA	4.99008	-0.598074	2.82175e-05	0.00767323
913	TR532642|c1_g1_i1	---NA---					NA	NA	NA	NA	-1.59488	3.44434	0.000413602	0.0288727
914	TR532775|c1_g1_i3	---NA---					NA	NA	NA	NA	-1.80724	4.75976	0.000145353	0.0175326
915	TR532838|c3_g3_i6	---NA---					NA	NA	NA	NA	1.83112	2.22138	0.000369658	0.0272209
916	TR532873|c1_g1_i3	allatotropin-like peptide precursor					NA	NA	NA	NA	3.0598	-0.0404547	0.00103926	0.0453978
917	TR532989|c1_g3_i15	tumor D54-like isoform X9					NA	NA	NA	NA	-9.09508	1.26827	0.000170623	0.0189557
918	TR532992|c0_g1_i3	---NA---					NA	NA	NA	NA	4.36317	1.57241	7.67785e-05	0.0124055
919	TR533036|c2_g1_i1	---NA---					NA	NA	NA	NA	-1.52915	1.80405	0.00027053	0.0232312
920	TR533052|c1_g1_i1	mitochondrial phosphate carrier		GO:0003735,GO:0006412,GO:0006810,GO:0008340,GO:0016021	structural constituent of ribosome,translation,transport,determination of adult lifespan,integral component of membrane	Molecular Function,Biological Process,Biological Process,Biological Process,Cellular Component	NA	NA	NA	NA	3.39025	-0.485754	0.000131248	0.0163983
921	TR533052|c1_g13_i1	---NA---					NA	NA	NA	NA	2.50288	2.41248	0.000384567	0.0277909
922	TR533052|c1_g5_i1	mitochondrial phosphate carrier partial		GO:0003700,GO:0005634,GO:0006355,GO:0006810,GO:0016021,GO:0046983	transcription factor activity sequence-specific DNA binding,nucleus,regulation of transcription DNA-templated,transport,integral component of membrane,protein dimerization activity	Molecular Function,Cellular Component,Biological Process,Biological Process,Cellular Component,Molecular Function	NA	NA	NA	NA	4.6448	1.13814	2.48279e-05	0.00730361
923	TR533062|c3_g1_i1	---NA---					NA	NA	NA	NA	1.18451	6.95033	8.3764e-06	0.00451854
926	TR533183|c0_g1_i1	Cysteine-rich 1		GO:0003680,GO:0005737,GO:0008270,GO:0008301,GO:0008630,GO:0010043,GO:0042277,GO:0071236,GO:0071493	AT DNA binding,cytoplasm,zinc ion binding,DNA binding bending,intrinsic apoptotic signaling pathway in response to DNA damage,response to zinc ion,peptide binding,cellular response to antibiotic,cellular response to UV-B	Molecular Function,Cellular Component,Molecular Function,Molecular Function,Biological Process,Biological Process,Molecular Function,Biological Process,Biological Process	NA	NA	NA	NA	1.34417	3.75733	0.000168908	0.0189385
927	TR533200|c2_g1_i4	PREDICTED: uncharacterized protein LOC101850387					NA	NA	NA	NA	3.1947	0.37949	0.000530848	0.0326436
928	TR533261|c0_g4_i2	---NA---					NA	NA	NA	NA	1.56164	4.37681	6.89591e-05	0.0118134
929	TR533299|c3_g5_i1	---NA---					NA	NA	NA	NA	-1.38419	6.08242	0.00118572	0.0479655
930	TR533336|c1_g1_i3	dual oxidase maturation factor 1-like isoform X1		GO:0005789,GO:0015031,GO:0016021	endoplasmic reticulum membrane,protein transport,integral component of membrane	Cellular Component,Biological Process,Cellular Component	NA	NA	NA	NA	1.57565	2.37027	0.000258343	0.0226809
931	TR533350|c0_g4_i1	PREDICTED: uncharacterized protein LOC101847223					NA	NA	NA	NA	2.9897	1.4118	2.16302e-05	0.00684363
932	TR533350|c0_g4_i8	PREDICTED: uncharacterized protein LOC101847223					NA	NA	NA	NA	2.64158	1.75172	0.000196833	0.0202652
933	TR533407|c2_g1_i2	---NA---					NA	NA	NA	NA	-1.56833	2.18575	0.000509005	0.0319659
934	TR533493|c2_g3_i1	Nuclear autoantigenic sperm					NA	NA	NA	NA	-1.49762	8.66954	0.000107695	0.0145715
935	TR533510|c1_g1_i1	sperm-associated antigen 6					NA	NA	NA	NA	9.66582	1.54992	0.000253009	0.0226214
936	TR533522|c4_g3_i1	ribosomal L35a		GO:0002181,GO:0003735,GO:0022625,GO:0042273	cytoplasmic translation,structural constituent of ribosome,cytosolic large ribosomal subunit,ribosomal large subunit biogenesis	Biological Process,Molecular Function,Cellular Component,Biological Process	NA	NA	NA	NA	5.77923	-0.508859	0.000363537	0.026953
937	TR533524|c2_g3_i1	---NA---					NA	NA	NA	NA	-6.32414	-0.844749	0.00026501	0.0229706
938	TR533539|c1_g1_i1	BTB POZ domain-containing KCTD16					NA	NA	NA	NA	2.59197	-0.135629	0.000846028	0.0415059
939	TR533561|c2_g1_i1	---NA---					NA	NA	NA	NA	2.56973	-0.255757	0.000962711	0.0440734
940	TR533561|c2_g2_i2	---NA---					NA	NA	NA	NA	1.90104	2.63077	3.4646e-05	0.00833216
941	TR533561|c2_g2_i4	---NA---					NA	NA	NA	NA	1.69249	3.44826	0.000191247	0.0201648
942	TR533600|c1_g4_i3	---NA---					NA	NA	NA	NA	-3.1969	-0.714555	0.00126561	0.0495358
943	TR533606|c2_g1_i1	---NA---					NA	NA	NA	NA	-2.12276	2.1483	0.000180182	0.0194823
944	TR533734|c0_g3_i1	---NA---					NA	NA	NA	NA	3.95381	-0.613378	0.000540194	0.0329788
945	TR533738|c1_g1_i1	Actin 5C		GO:0005524	ATP binding	Molecular Function	NA	NA	NA	NA	4.61158	0.0208788	0.000202624	0.020339
946	TR533824|c3_g1_i2	thymidine phosphorylase-like	EC:2.4.1.1,EC:2.4.2.4	GO:0004645,GO:0005829,GO:0006220,GO:0009032	phosphorylase activity,cytosol,pyrimidine nucleotide metabolic process,thymidine phosphorylase activity	Molecular Function,Cellular Component,Biological Process,Molecular Function	NA	NA	NA	NA	5.90202	0.390728	0.000394929	0.0281598
947	TR533897|c0_g5_i1	PREDICTED: matrilin-2-like					NA	NA	NA	NA	4.07818	-0.704424	0.000121271	0.0156485
949	TR533948|c1_g2_i5	---NA---					NA	NA	NA	NA	-2.08106	3.49503	9.1869e-05	0.0136509
950	TR534101|c0_g1_i1	probable nuclear hormone receptor HR3 isoform X3					NA	NA	NA	NA	3.52439	-0.581846	0.000308282	0.0250024
951	TR534126|c0_g1_i1	tubulin alpha-1C chain- partial	EC:3.6.1,EC:3.6.1.15	GO:0000226,GO:0003725,GO:0003924,GO:0005200,GO:0005525,GO:0005634,GO:0005881,GO:0031625,GO:0036464,GO:0043209,GO:0055037,GO:0070062,GO:0071353	microtubule cytoskeleton organization,double-stranded RNA binding,GTPase activity,structural constituent of cytoskeleton,GTP binding,nucleus,cytoplasmic microtubule,ubiquitin protein ligase binding,cytoplasmic ribonucleoprotein granule,myelin sheath,recycling endosome,extracellular exosome,cellular response to interleukin-4	Biological Process,Molecular Function,Molecular Function,Molecular Function,Molecular Function,Cellular Component,Cellular Component,Molecular Function,Cellular Component,Cellular Component,Cellular Component,Cellular Component,Biological Process	NA	NA	NA	NA	-1.36182	8.17566	0.000451157	0.0301715
952	TR534126|c0_g1_i3	tubulin alpha-1C chain- partial	EC:3.6.1,EC:3.6.1.15	GO:0000226,GO:0003725,GO:0003924,GO:0005200,GO:0005525,GO:0005634,GO:0005881,GO:0031625,GO:0036464,GO:0043209,GO:0055037,GO:0070062,GO:0071353	microtubule cytoskeleton organization,double-stranded RNA binding,GTPase activity,structural constituent of cytoskeleton,GTP binding,nucleus,cytoplasmic microtubule,ubiquitin protein ligase binding,cytoplasmic ribonucleoprotein granule,myelin sheath,recycling endosome,extracellular exosome,cellular response to interleukin-4	Biological Process,Molecular Function,Molecular Function,Molecular Function,Molecular Function,Cellular Component,Cellular Component,Molecular Function,Cellular Component,Cellular Component,Cellular Component,Cellular Component,Biological Process	NA	NA	NA	NA	-1.253	9.61811	0.000697541	0.0373725
953	TR534474|c0_g1_i1	abdominal ganglion neuropeptides L5-67 precursor					NA	NA	NA	NA	1.9931	3.38378	1.87755e-06	0.00231726
954	TR534474|c0_g2_i1	---NA---					NA	NA	NA	NA	2.97202	-0.204091	5.60491e-05	0.0106239
955	TR534501|c0_g1_i1	---NA---					NA	NA	NA	NA	-2.00358	0.0476527	0.000713183	0.0377031
956	TR534503|c1_g1_i1	---NA---					NA	NA	NA	NA	3.99566	-0.310727	0.000217414	0.021117
957	TR534523|c0_g7_i1	---NA---					NA	NA	NA	NA	4.84847	-0.599447	0.00109806	0.0464384
958	TR534526|c1_g2_i1	coiled-coil domain-containing 34					NA	NA	NA	NA	-1.22391	3.69318	0.000303251	0.0248236
959	TR534544|c0_g5_i1	glutamate receptor 1					NA	NA	NA	NA	2.78256	3.02728	6.63261e-06	0.00400922
960	TR534544|c0_g5_i3	glutamate receptor 1					NA	NA	NA	NA	2.13661	3.70384	0.000208024	0.0206415
961	TR534544|c0_g5_i4	glutamate receptor 1					NA	NA	NA	NA	3.03834	1.90667	8.9454e-06	0.00462333
962	TR534550|c1_g1_i3	---NA---					NA	NA	NA	NA	-2.01694	1.1371	0.00119311	0.0481077
963	TR534571|c2_g2_i2	---NA---					NA	NA	NA	NA	-1.75941	5.55527	0.000817794	0.0406265
964	TR534590|c1_g1_i1	Sodium calcium exchanger partial		GO:0006810	transport	Biological Process	NA	NA	NA	NA	5.1508	-1.29053	0.00124835	0.0491518
965	TR534612|c1_g1_i2	---NA---					NA	NA	NA	NA	1.49994	2.37448	0.00114941	0.0472781
966	TR534633|c2_g6_i1	transmembrane emp24 domain-containing partial		GO:0016020	membrane	Cellular Component	NA	NA	NA	NA	3.60124	0.846147	9.77428e-05	0.0140151
967	TR534656|c0_g2_i2	CD82 antigen-like					NA	NA	NA	NA	1.6829	4.32084	5.41128e-05	0.0104003
968	TR535140|c0_g2_i1	peptidase inhibitor 16-like					NA	NA	NA	NA	1.6311	3.79356	5.33242e-05	0.010343
969	TR535232|c4_g2_i4	---NA---					NA	NA	NA	NA	1.91024	3.2763	0.000299571	0.0246664
970	TR535549|c2_g3_i2	peptidase inhibitor 16					NA	NA	NA	NA	7.30389	-0.390581	0.000573365	0.0339126
971	TR535605|c1_g1_i3	---NA---					NA	NA	NA	NA	2.06106	-0.00425957	0.00128028	0.0497963
972	TR535636|c1_g3_i3	---NA---					NA	NA	NA	NA	3.34037	-0.775056	0.00102557	0.0452381
973	TR535649|c0_g2_i1	---NA---					NA	NA	NA	NA	-2.32631	0.389239	0.00130853	0.0499925
974	TR535828|c0_g2_i2	---NA---					NA	NA	NA	NA	-2.68028	-0.16219	0.000480516	0.0310678
975	TR535850|c2_g1_i2	frizzled-4-like isoform X1		GO:0004888,GO:0016020,GO:0016055	transmembrane signaling receptor activity,membrane,Wnt signaling pathway	Molecular Function,Cellular Component,Biological Process	NA	NA	NA	NA	3.55517	0.766343	0.000175379	0.019329
976	TR535958|c4_g3_i1	---NA---					NA	NA	NA	NA	-2.11704	1.91843	0.00080078	0.0402378
977	TR536030|c1_g1_i6	ankyrin repeat-containing					NA	NA	NA	NA	3.19378	0.104306	0.000103933	0.0142949
978	TR536058|c3_g1_i1	---NA---					NA	NA	NA	NA	3.51663	3.28199	0.000523997	0.0324422
979	TR536091|c3_g1_i4	ADAM family mig-17-like isoform X2					NA	NA	NA	NA	4.09597	1.31652	8.41378e-05	0.0130903
980	TR536236|c3_g1_i8	EF-hand calcium-binding domain-containing 1-like					NA	NA	NA	NA	-1.25068	5.63439	0.00127581	0.0497711
981	TR536299|c3_g4_i6	sodium channel 1 brain-like		GO:0001518,GO:0005248,GO:0034765,GO:0035725,GO:0060078	voltage-gated sodium channel complex,voltage-gated sodium channel activity,regulation of ion transmembrane transport,sodium ion transmembrane transport,regulation of postsynaptic membrane potential	Cellular Component,Molecular Function,Biological Process,Biological Process,Biological Process	NA	NA	NA	NA	8.24568	-0.360544	0.000197928	0.0202652
982	TR536404|c3_g6_i1	tubulin beta partial		GO:0005200,GO:0005525,GO:0005874,GO:0007017	structural constituent of cytoskeleton,GTP binding,microtubule,microtubule-based process	Molecular Function,Molecular Function,Cellular Component,Biological Process	NA	NA	NA	NA	-1.45978	8.63646	0.000198912	0.0203181
984	TR536495|c2_g1_i1	sodium channel 1 brain-like		GO:0001518,GO:0005248,GO:0034765,GO:0035725,GO:0060078	voltage-gated sodium channel complex,voltage-gated sodium channel activity,regulation of ion transmembrane transport,sodium ion transmembrane transport,regulation of postsynaptic membrane potential	Cellular Component,Molecular Function,Biological Process,Biological Process,Biological Process	NA	NA	NA	NA	-2.26763	3.1379	0.000446227	0.0299927
985	TR536506|c3_g1_i5	FMRFamide receptor-like					NA	NA	NA	NA	2.47802	0.249216	0.000460777	0.0305151
986	TR536603|c2_g1_i1	PREDICTED: uncharacterized protein LOC101854055 isoform X1					NA	NA	NA	NA	8.2438	0.493154	1.18398e-05	0.00515688
988	TR536670|c3_g3_i2	---NA---					NA	NA	NA	NA	2.26813	0.491267	0.000321889	0.025485
989	TR536672|c0_g1_i1	---NA---					NA	NA	NA	NA	2.0956	1.10442	0.000274067	0.0234551
990	TR536707|c0_g2_i7	---NA---					NA	NA	NA	NA	5.40529	0.916876	0.000209904	0.0206947
991	TR536715|c4_g1_i3	---NA---					NA	NA	NA	NA	-1.58401	1.79664	0.00104751	0.0454763
992	TR536839|c2_g1_i1	---NA---					NA	NA	NA	NA	-1.61112	1.67492	0.00128674	0.0497963
993	TR536900|c0_g1_i2	WD G-beta repeat-containing					NA	NA	NA	NA	8.57009	0.400707	4.65774e-08	0.000337504
994	TR536924|c1_g1_i1	blastula protease 10-like					NA	NA	NA	NA	2.67156	2.83143	0.000219003	0.0211599
995	TR536970|c1_g1_i3	---NA---					NA	NA	NA	NA	-6.7028	1.20619	8.3388e-06	0.00451854
996	TR537120|c2_g4_i13	---NA---					NA	NA	NA	NA	3.0039	0.495061	0.00114002	0.0471262
999	TR537626|c3_g2_i1	vacuolar H+-translocating inorganic pyrophosphatase		GO:0016787	hydrolase activity	Molecular Function	NA	NA	NA	NA	-5.61208	-0.342072	5.17688e-05	0.010252
1001	TR537851|c2_g3_i1	---NA---					NA	NA	NA	NA	-1.92948	3.15644	0.00015718	0.0184212
1002	TR537851|c2_g4_i1	---NA---					NA	NA	NA	NA	-2.18889	2.60222	0.000197385	0.0202652
1003	TR537896|c3_g3_i2	gamma-aminobutyric acid receptor subunit gamma-2-like isoform X2		GO:0006811,GO:0016020	ion transport,membrane	Biological Process,Cellular Component	NA	NA	NA	NA	2.44434	-0.271676	0.000171813	0.0190116
1004	TR537947|c2_g1_i4	---NA---					NA	NA	NA	NA	-1.42924	4.40493	0.000872163	0.042096
1005	TR537949|c1_g2_i1	nuclear distribution nudE homolog 1-like					NA	NA	NA	NA	6.02844	-1.46394	0.000507639	0.0319042
1006	TR538117|c0_g1_i1	---NA---					NA	NA	NA	NA	-1.852	0.444475	0.001029	0.045317
1007	TR538117|c0_g1_i2	---NA---					NA	NA	NA	NA	-2.07443	0.694047	0.00097666	0.0442159
1008	TR538146|c1_g1_i2	---NA---					NA	NA	NA	NA	-1.69446	1.88094	0.00043658	0.0297186
1009	TR538204|c1_g1_i1	---NA---					NA	NA	NA	NA	-1.59408	3.38864	0.000608499	0.0349681
1010	TR538250|c0_g3_i2	---NA---					NA	NA	NA	NA	-3.02489	1.60662	0.00129247	0.0497963
1011	TR538431|c1_g1_i4	myosin regulatory light chain		GO:0005509,GO:0016459	calcium ion binding,myosin complex	Molecular Function,Cellular Component	NA	NA	NA	NA	3.34635	0.109395	0.000655912	0.0359435
1012	TR538431|c1_g1_i5	myosin regulatory light chain		GO:0005509,GO:0005623,GO:0045454,GO:0055114	calcium ion binding,cell,cell redox homeostasis,oxidation-reduction process	Molecular Function,Cellular Component,Biological Process,Biological Process	NA	NA	NA	NA	3.7557	1.45343	0.000227986	0.0215261
1013	TR538431|c2_g2_i1	myosin regulatory light chain smooth adductor muscle-like isoform X1		GO:0005509,GO:0005623,GO:0045454,GO:0055114	calcium ion binding,cell,cell redox homeostasis,oxidation-reduction process	Molecular Function,Cellular Component,Biological Process,Biological Process	NA	NA	NA	NA	3.59336	6.77186	4.58647e-06	0.00335474
1014	TR538431|c2_g2_i2	myosin regulatory light chain smooth adductor muscle-like isoform X1		GO:0005509,GO:0005623,GO:0045454,GO:0055114	calcium ion binding,cell,cell redox homeostasis,oxidation-reduction process	Molecular Function,Cellular Component,Biological Process,Biological Process	NA	NA	NA	NA	1.62515	6.96241	0.000107003	0.0145109
1015	TR538466|c0_g1_i1	---NA---					NA	NA	NA	NA	5.40286	-0.292468	1.23075e-05	0.0052251
1016	TR538563|c3_g4_i1	---NA---					NA	NA	NA	NA	-1.82537	1.17003	0.000346877	0.0264969
1017	TR538586|c1_g1_i2	methyltransferase 7A		GO:0016740	transferase activity	Molecular Function	NA	NA	NA	NA	5.13984	0.403604	0.000145289	0.0175326
1018	TR538817|c0_g9_i3	---NA---					NA	NA	NA	NA	-2.24151	0.517843	0.000158888	0.0184689
1019	TR538818|c1_g3_i6	PREDICTED: uncharacterized protein LOC101845204					NA	NA	NA	NA	-1.35779	4.77937	0.00113842	0.0471262
1020	TR538912|c0_g1_i3	---NA---					NA	NA	NA	NA	4.78705	0.277079	1.72513e-05	0.00616326
1021	TR538921|c0_g1_i8	seductin					NA	NA	NA	NA	1.96486	3.05595	0.000478302	0.0310678
1022	TR538981|c3_g1_i2	polyadenylate-binding 4-like					NA	NA	NA	NA	-1.35318	10.3914	0.000506314	0.0319042
1023	TR539057|c0_g3_i1	---NA---					NA	NA	NA	NA	3.32517	1.2558	0.00047748	0.0310678
1024	TR539077|c1_g1_i2	---NA---					NA	NA	NA	NA	7.88658	1.11048	4.61047e-07	0.00112836
1025	TR539294|c0_g2_i2	caveolin-1-like		GO:0005794,GO:0005886,GO:0044425	Golgi apparatus,plasma membrane,membrane part	Cellular Component,Cellular Component,Cellular Component	NA	NA	NA	NA	2.12948	3.43531	9.01256e-06	0.00462928
1026	TR539369|c0_g1_i2	myosin heavy chain	EC:3.6.1,EC:3.6.1.15	GO:0003774,GO:0003779,GO:0005524,GO:0016459	motor activity,actin binding,ATP binding,myosin complex	Molecular Function,Molecular Function,Molecular Function,Cellular Component	NA	NA	NA	NA	3.08414	-0.533292	0.000191547	0.0201648
1027	TR539369|c0_g2_i1	myosin heavy striated muscle-like	EC:3.6.1,EC:3.6.1.15	GO:0003774,GO:0003779,GO:0005516,GO:0005524,GO:0030016,GO:0032982	motor activity,actin binding,calmodulin binding,ATP binding,myofibril,myosin filament	Molecular Function,Molecular Function,Molecular Function,Molecular Function,Cellular Component,Cellular Component	NA	NA	NA	NA	3.26126	0.919968	2.77066e-05	0.00765599
1028	TR539369|c0_g3_i1	myosin heavy striated muscle-like	EC:3.6.1,EC:3.6.1.15	GO:0003774,GO:0003779,GO:0005524,GO:0016459	motor activity,actin binding,ATP binding,myosin complex	Molecular Function,Molecular Function,Molecular Function,Cellular Component	NA	NA	NA	NA	6.44284	1.59683	6.49538e-06	0.00400922
1029	TR539369|c0_g4_i1	myosin heavy chain	EC:3.6.1,EC:3.6.1.15	GO:0003774,GO:0003779,GO:0005524,GO:0016459	motor activity,actin binding,ATP binding,myosin complex	Molecular Function,Molecular Function,Molecular Function,Cellular Component	NA	NA	NA	NA	4.74741	1.71498	3.26823e-05	0.0081125
1030	TR539369|c0_g5_i1	myosin heavy chain	EC:3.6.1,EC:3.6.1.15	GO:0003774,GO:0003779,GO:0005516,GO:0005524,GO:0030016,GO:0032982	motor activity,actin binding,calmodulin binding,ATP binding,myofibril,myosin filament	Molecular Function,Molecular Function,Molecular Function,Molecular Function,Cellular Component,Cellular Component	NA	NA	NA	NA	3.95869	1.76851	0.00118931	0.0480724
1031	TR539439|c4_g10_i1	spermatogenesis-associated 4-like isoform X2					NA	NA	NA	NA	-1.82589	-0.112458	0.00112268	0.0468501
1032	TR539466|c5_g2_i1	---NA---					NA	NA	NA	NA	4.19952	-1.20183	0.00102187	0.0451702
1033	TR539466|c5_g4_i1	DD3-3-like					NA	NA	NA	NA	2.2295	3.218	6.0509e-08	0.000387309
1034	TR539466|c5_g5_i1	DD3-3-like					NA	NA	NA	NA	2.14718	1.73474	0.000407872	0.0287121
1035	TR539466|c5_g5_i4	DD3-3-like					NA	NA	NA	NA	4.44535	0.850966	7.5998e-06	0.00433022
1036	TR539471|c1_g5_i2	Phosphonopyruvate decarboxylase		GO:0005488,GO:0016829	binding,lyase activity	Molecular Function,Molecular Function	NA	NA	NA	NA	2.99311	0.920194	0.0010384	0.0453978
1037	TR539498|c0_g7_i2	---NA---					NA	NA	NA	NA	-2.39457	0.240258	0.00115271	0.0473201
1038	TR539575|c0_g1_i2	---NA---					NA	NA	NA	NA	-2.16553	-0.243674	0.000729515	0.0382506
1039	TR539611|c3_g2_i1	actin 1		GO:0005524,GO:0005737,GO:0005856	ATP binding,cytoplasm,cytoskeleton	Molecular Function,Cellular Component,Cellular Component	NA	NA	NA	NA	2.48126	1.94117	0.000468732	0.0307357
1040	TR539645|c2_g3_i2	---NA---					NA	NA	NA	NA	5.0376	1.75535	1.73672e-05	0.00617583
1041	TR539645|c2_g3_i3	---NA---					NA	NA	NA	NA	2.97017	0.318549	0.000180383	0.0194823
1042	TR539687|c2_g1_i1	---NA---					NA	NA	NA	NA	3.01388	1.4881	0.0002192	0.0211599
1043	TR539695|c3_g3_i3	ribosomal S6 kinase beta-1-like	EC:2.7.11	GO:0004674,GO:0005524,GO:0006468,GO:0007165	protein serine/threonine kinase activity,ATP binding,protein phosphorylation,signal transduction	Molecular Function,Molecular Function,Biological Process,Biological Process	NA	NA	NA	NA	-2.63041	3.90998	9.44214e-05	0.0138083
1044	TR539735|c5_g1_i5	---NA---					NA	NA	NA	NA	-3.38697	-0.423462	5.34496e-05	0.0103433
1045	TR539744|c4_g1_i1	---NA---					NA	NA	NA	NA	-1.90277	2.30513	0.000908293	0.0428801
1046	TR539798|c2_g3_i1	---NA---					NA	NA	NA	NA	1.79572	4.11925	0.000561576	0.0334811
1047	TR539807|c1_g1_i1	pdz domain containing					NA	NA	NA	NA	3.66832	0.929797	0.000237226	0.0218361
1048	TR539824|c3_g5_i1	renin receptor-like					NA	NA	NA	NA	1.38031	4.25179	0.00115691	0.0473526
1049	TR539885|c2_g1_i1	Sn1-specific diacylglycerol lipase alpha		GO:0016020	membrane	Cellular Component	NA	NA	NA	NA	2.85907	0.704579	0.000143468	0.0174025
1051	TR539916|c2_g2_i1	epidermal growth factor receptor		GO:0004672,GO:0009987,GO:0044699	protein kinase activity,cellular process,single-organism process	Molecular Function,Biological Process,Biological Process	NA	NA	NA	NA	1.45508	2.11873	0.000789043	0.0399131
1052	TR539924|c4_g5_i1	---NA---					NA	NA	NA	NA	-1.53313	2.00791	0.000435595	0.02971
1054	TR539992|c1_g2_i2	---NA---					NA	NA	NA	NA	4.36059	1.11403	1.56777e-05	0.00587638
1055	TR539992|c1_g2_i3	---NA---					NA	NA	NA	NA	4.24887	0.542236	0.000578587	0.0341211
1056	TR540020|c3_g1_i5	UBX domain-containing 6		GO:0043226	organelle	Cellular Component	NA	NA	NA	NA	2.37577	1.23781	0.00126416	0.0495358
1057	TR540023|c0_g1_i2	DFPA_LOLVU ame: Full=Diisopropyl-fluorophosphatase Short=DFPase	EC:3.1,EC:3.1.8.2	GO:0005509,GO:0047862	calcium ion binding,diisopropyl-fluorophosphatase activity	Molecular Function,Molecular Function	NA	NA	NA	NA	5.60678	0.319174	6.93244e-08	0.000396035
1058	TR540063|c0_g1_i1	---NA---					NA	NA	NA	NA	2.37264	1.76446	0.000314609	0.0252224
1059	TR540072|c4_g2_i1	---NA---					NA	NA	NA	NA	2.96174	-0.647239	0.00022154	0.0212959
1060	TR540338|c1_g1_i2	zinc finger 681-like					NA	NA	NA	NA	2.15406	0.87854	0.000805323	0.0403199
1063	TR540498|c6_g4_i1	---NA---					NA	NA	NA	NA	2.72584	1.24206	0.00101412	0.0449868
1064	TR540502|c2_g1_i2	Blastula protease 10		GO:0016787	hydrolase activity	Molecular Function	NA	NA	NA	NA	2.87988	-0.0514821	0.000878207	0.0421676
1065	TR540503|c0_g1_i4	---NA---					NA	NA	NA	NA	3.84	-0.637083	0.00026484	0.0229706
1066	TR540568|c0_g1_i4	PREDICTED: josephin-1-like	EC:3.4,EC:3.4.19.12	GO:0004843,GO:0016579	thiol-dependent ubiquitin-specific protease activity,protein deubiquitination	Molecular Function,Biological Process	NA	NA	NA	NA	7.09136	0.41336	0.00106799	0.0458255
1067	TR540624|c0_g1_i2	---NA---					NA	NA	NA	NA	2.82901	4.77564	8.05735e-05	0.012795
1068	TR540624|c0_g1_i5	---NA---					NA	NA	NA	NA	-6.19284	2.5973	1.71032e-05	0.00616091
1069	TR540910|c1_g1_i2	neuronal membrane glyco M6-b-like isoform X2					NA	NA	NA	NA	3.59842	0.5268	0.000616263	0.0351163
1070	TR540918|c1_g1_i1	carboxypeptidase B-like					NA	NA	NA	NA	3.35566	-0.679925	0.000728258	0.0382506
1072	TR541150|c0_g1_i1	PREDICTED: uncharacterized protein LOC101847836					NA	NA	NA	NA	6.59847	-0.797188	0.000488279	0.0313746
1073	TR541173|c1_g1_i4	probable serine carboxypeptidase CPVL-like					NA	NA	NA	NA	2.36706	1.4317	0.00114335	0.0471262
1074	TR541530|c0_g2_i2	---NA---					NA	NA	NA	NA	-7.53864	-0.184586	0.000873681	0.0421204
1075	TR541725|c3_g3_i6	---NA---					NA	NA	NA	NA	4.85796	0.223905	2.46924e-05	0.00730361
1076	TR541758|c0_g2_i5	serine threonine- kinase TBK1-like		GO:0016740	transferase activity	Molecular Function	NA	NA	NA	NA	2.1215	2.24707	0.000127532	0.0160789
1077	TR541807|c1_g1_i1	aggrecan core					NA	NA	NA	NA	4.33149	-1.04645	0.0012282	0.0488061
1078	TR541815|c4_g1_i2	---NA---					NA	NA	NA	NA	-4.68546	-0.411995	3.9302e-06	0.0031261
1079	TR542065|c0_g1_i1	WASH complex subunit FAM21C-like		GO:0005546,GO:0005547,GO:0005730,GO:0005769,GO:0010314,GO:0030904,GO:0032266,GO:0043325,GO:0070273,GO:0071203,GO:0080025	phosphatidylinositol-45-bisphosphate binding,phosphatidylinositol-345-trisphosphate binding,nucleolus,early endosome,phosphatidylinositol-5-phosphate binding,retromer complex,phosphatidylinositol-3-phosphate binding,phosphatidylinositol-34-bisphosphate binding,phosphatidylinositol-4-phosphate binding,WASH complex,phosphatidylinositol-35-bisphosphate binding	Molecular Function,Molecular Function,Cellular Component,Cellular Component,Molecular Function,Cellular Component,Molecular Function,Molecular Function,Molecular Function,Cellular Component,Molecular Function	NA	NA	NA	NA	2.39025	0.85665	0.00114402	0.0471262
1080	TR542079|c3_g1_i5	---NA---					NA	NA	NA	NA	-5.57317	-0.780014	0.000482759	0.0311402
1081	TR542118|c1_g1_i4	---NA---					NA	NA	NA	NA	9.10725	-0.230111	2.99773e-05	0.00786674
1082	TR542128|c0_g1_i5	---NA---					NA	NA	NA	NA	2.9077	-1.00746	0.0012568	0.0493979
1083	TR542165|c4_g1_i1	G -activated inward rectifier potassium channel 2		GO:0005244,GO:0006813,GO:0016020	voltage-gated ion channel activity,potassium ion transport,membrane	Molecular Function,Biological Process,Cellular Component	NA	NA	NA	NA	4.18794	-0.0627667	1.15447e-05	0.00514965
1084	TR542216|c2_g1_i6	ZINC INDUCED FACILITATOR-LIKE 1-like					NA	NA	NA	NA	7.69957	-0.560387	0.00113847	0.0471262
1085	TR542276|c2_g2_i5	zinc finger and BTB domain-containing 17-like isoform X1		GO:0003676,GO:0046872	nucleic acid binding,metal ion binding	Molecular Function,Molecular Function	NA	NA	NA	NA	7.45017	0.039443	0.000297777	0.0246664
1087	TR542336|c0_g1_i6	serine threonine- phosphatase 6 regulatory ankyrin repeat subunit B-like					NA	NA	NA	NA	-3.49023	-0.244876	0.000781781	0.039812
1088	TR542484|c0_g1_i1	myosin heavy striated muscle-like isoform X1	EC:3.6.1,EC:3.6.1.15	GO:0003774,GO:0005524,GO:0016459,GO:0051015	motor activity,ATP binding,myosin complex,actin filament binding	Molecular Function,Molecular Function,Cellular Component,Molecular Function	NA	NA	NA	NA	2.80427	-0.177049	0.00124811	0.0491518
1089	TR542485|c1_g4_i1	---NA---					NA	NA	NA	NA	1.78974	1.67657	0.000651119	0.0358915
1090	TR542531|c0_g2_i2	---NA---					NA	NA	NA	NA	1.86804	0.787232	0.000363753	0.026953
1091	TR542826|c2_g3_i1	zinc finger 271-like					NA	NA	NA	NA	4.08424	-0.232858	3.55349e-05	0.00847249
1092	TR543009|c0_g1_i1	---NA---					NA	NA	NA	NA	3.90222	0.33571	0.000497077	0.0316225
1093	TR543009|c0_g1_i2	---NA---					NA	NA	NA	NA	7.82906	-0.81462	0.0004511	0.0301715
1094	TR543010|c6_g1_i1	APL- isoform a		GO:0005488,GO:0007275,GO:0016020,GO:0043227,GO:0044444	binding,multicellular organism development,membrane,membrane-bounded organelle,cytoplasmic part	Molecular Function,Biological Process,Cellular Component,Cellular Component,Cellular Component	NA	NA	NA	NA	2.01733	4.0932	3.00514e-05	0.00786674
1095	TR543010|c6_g2_i1	amyloid precursor - partial		GO:0005515,GO:0008201,GO:0016021,GO:0046914	protein binding,heparin binding,integral component of membrane,transition metal ion binding	Molecular Function,Molecular Function,Cellular Component,Molecular Function	NA	NA	NA	NA	2.10365	0.673097	0.000297716	0.0246664
1096	TR543046|c2_g2_i5	major vault -like		GO:0005634,GO:0005737,GO:0048731	nucleus,cytoplasm,system development	Cellular Component,Cellular Component,Biological Process	NA	NA	NA	NA	2.01146	2.88083	0.000254159	0.0226693
1097	TR543048|c2_g1_i2	---NA---					NA	NA	NA	NA	-1.33932	6.23157	0.000742949	0.0385421
1098	TR543078|c1_g6_i1	---NA---					NA	NA	NA	NA	2.53375	6.48298	2.51508e-05	0.0073588
1099	TR543095|c0_g3_i2	chondroitin proteoglycan 2-like					NA	NA	NA	NA	2.0358	2.83642	0.00130199	0.0498802
1100	TR543095|c0_g3_i3	chondroitin proteoglycan 2-like					NA	NA	NA	NA	4.96213	0.770566	0.000486165	0.0313174
1101	TR543100|c1_g2_i4	arf-GAP with coiled- ANK repeat and PH domain-containing 2 isoform X2					NA	NA	NA	NA	-6.44848	-0.255736	0.000790663	0.0399251
1102	TR543103|c3_g1_i11	PREDICTED: uncharacterized protein LOC101863238 isoform X1					NA	NA	NA	NA	3.31674	2.34486	0.00115964	0.0474174
1103	TR543153|c1_g4_i2	matrix-remodeling-associated 5-like					NA	NA	NA	NA	-5.44185	-0.513033	0.000990076	0.0445743
1104	TR543175|c1_g2_i10	Tenascin- partial					NA	NA	NA	NA	3.71421	-0.737196	0.000389778	0.0279843
1105	TR543229|c2_g1_i5	---NA---					NA	NA	NA	NA	7.51462	0.513157	0.00104901	0.0454763
1106	TR543236|c4_g6_i2	poly A binding cytoplasmic 1 partial					NA	NA	NA	NA	5.83913	-0.402437	9.48785e-05	0.0138091
1107	TR543245|c5_g1_i12	PREDICTED: NIF3-like protein 1-like isoform X2					NA	NA	NA	NA	5.15385	2.10921	0.000192549	0.0202045
1108	TR543246|c0_g2_i2	---NA---					NA	NA	NA	NA	-1.71385	4.43647	9.4925e-05	0.0138091
1109	TR543521|c0_g1_i1	apolipo (a)-like	EC:3.4.21	GO:0002576,GO:0004252,GO:0004930,GO:0005102,GO:0006508,GO:0007166,GO:0007186,GO:0008285,GO:0010812,GO:0016021,GO:0019904,GO:0022617,GO:0031093,GO:0031232,GO:0034185,GO:0044218,GO:0044267,GO:0048771,GO:0051918,GO:0051919,GO:0070062,GO:0072562,GO:2000048	platelet degranulation,serine-type endopeptidase activity,G-protein coupled receptor activity,receptor binding,proteolysis,cell surface receptor signaling pathway,G-protein coupled receptor signaling pathway,negative regulation of cell proliferation,negative regulation of cell-substrate adhesion,integral component of membrane,protein domain specific binding,extracellular matrix disassembly,platel…	Biological Process,Molecular Function,Molecular Function,Molecular Function,Biological Process,Biological Process,Biological Process,Biological Process,Biological Process,Cellular Component,Molecular Function,Biological Process,Cellular Component,Cellular Component,Molecular Function,Cellular Component,Biological Process,Biological Process,Biological Process,Biological Process,Cellular Component,…	NA	NA	NA	NA	2.95173	1.48375	0.00057994	0.0341766
1111	TR543584|c1_g2_i8	dentin sialophospho -like isoform X5					NA	NA	NA	NA	6.82566	-0.345426	2.62508e-05	0.00748067
1112	TR543588|c0_g2_i11	acyl- -binding domain-containing 5 isoform X2		GO:0000062,GO:0005654,GO:0005778,GO:0006810,GO:0008289,GO:0016021,GO:0030242,GO:0035973	fatty-acyl-CoA binding,nucleoplasm,peroxisomal membrane,transport,lipid binding,integral component of membrane,pexophagy,aggrephagy	Molecular Function,Cellular Component,Cellular Component,Biological Process,Molecular Function,Cellular Component,Biological Process,Biological Process	NA	NA	NA	NA	6.34659	-0.917693	0.00127787	0.0497812
1113	TR543634|c2_g5_i2	axoneme-associated mst101(2)-like					NA	NA	NA	NA	3.44157	1.10941	0.000118172	0.0154854
1114	TR543635|c17_g5_i1	---NA---					NA	NA	NA	NA	-1.24122	4.15009	0.00117602	0.0478124
1115	TR543635|c17_g6_i1	---NA---					NA	NA	NA	NA	-1.4633	4.93791	0.000438588	0.0297655
1116	TR543638|c3_g1_i4	Carnitine O-palmitoyltransferase liver isoform					NA	NA	NA	NA	4.65636	-0.132532	0.000542468	0.0330449
1117	TR543654|c3_g4_i4	---NA---					NA	NA	NA	NA	4.86046	-0.61937	0.000626962	0.0354416
1118	TR543921|c0_g1_i5	---NA---					NA	NA	NA	NA	3.79444	1.09752	0.00037526	0.027367
1119	TR543922|c1_g1_i1	---NA---					NA	NA	NA	NA	1.63964	3.50687	8.67907e-05	0.0132628
1120	TR544005|c3_g3_i1	---NA---					NA	NA	NA	NA	-2.0223	4.35767	0.00045057	0.0301715
1121	TR544011|c3_g1_i2	prolyl 4-hydroxylase subunit alpha-1 isoform X2					NA	NA	NA	NA	2.39294	3.4646	3.24228e-05	0.0081125
1122	TR544014|c2_g1_i3	chitin deacetylase-like partial		GO:0003824,GO:0071704	catalytic activity,organic substance metabolic process	Molecular Function,Biological Process	NA	NA	NA	NA	5.1073	0.467161	0.000634751	0.0355456
1123	TR544052|c1_g2_i1	---NA---					NA	NA	NA	NA	7.11803	-1.32673	0.000347088	0.0264969
1124	TR544091|c0_g1_i2	---NA---					NA	NA	NA	NA	-2.20484	0.309461	0.000441325	0.0298077
1125	TR544127|c2_g1_i2	---NA---					NA	NA	NA	NA	4.01535	-0.956673	0.000243917	0.0222204
1126	TR544162|c0_g3_i2	---NA---					NA	NA	NA	NA	-1.52824	3.55522	6.5976e-05	0.0116559
1127	TR544227|c2_g3_i2	probable thiopurine S-methyltransferase		GO:0008168	methyltransferase activity	Molecular Function	NA	NA	NA	NA	2.9248	0.391377	0.000590209	0.0344419
1128	TR544274|c17_g4_i2	---NA---					NA	NA	NA	NA	-1.55648	1.83281	0.000684514	0.0369145
1129	TR544302|c1_g4_i1	PREDICTED: uncharacterized protein LOC101863352					NA	NA	NA	NA	4.60938	-0.827399	0.000507394	0.0319042
1130	TR544309|c1_g1_i3	hypothetical protein LOTGIDRAFT_54193, partial		GO:0004970,GO:0005234,GO:0016021,GO:0030054,GO:0034220,GO:0035235,GO:0045211	ionotropic glutamate receptor activity,extracellular-glutamate-gated ion channel activity,integral component of membrane,cell junction,ion transmembrane transport,ionotropic glutamate receptor signaling pathway,postsynaptic membrane	Molecular Function,Molecular Function,Cellular Component,Cellular Component,Biological Process,Biological Process,Cellular Component	NA	NA	NA	NA	6.68923	-1.13853	4.89512e-05	0.00986192
1131	TR544343|c1_g1_i3	hypothetical protein LOTGIDRAFT_231644					NA	NA	NA	NA	6.44218	-1.13548	0.000299362	0.0246664
1132	TR544511|c0_g1_i1	SPAN_STRPU ame: Full= Flags: Precursor					NA	NA	NA	NA	4.05697	1.51738	3.17614e-05	0.00807952
1133	TR544546|c4_g1_i1	---NA---					NA	NA	NA	NA	-1.65945	10.3212	0.000851254	0.0415935
1134	TR544712|c0_g3_i2	BTB POZ domain-containing 6		GO:0005829,GO:0019005,GO:0022008,GO:0030162,GO:0031625,GO:0042787,GO:0043161	cytosol,SCF ubiquitin ligase complex,neurogenesis,regulation of proteolysis,ubiquitin protein ligase binding,protein ubiquitination involved in ubiquitin-dependent protein catabolic process,proteasome-mediated ubiquitin-dependent protein catabolic process	Cellular Component,Cellular Component,Biological Process,Biological Process,Molecular Function,Biological Process,Biological Process	NA	NA	NA	NA	-7.82669	0.844246	0.000906094	0.0428636
1135	TR544753|c1_g2_i1	cathepsin Z	EC:3.4.22,EC:3.4	GO:0001525,GO:0004197,GO:0005615,GO:0005764,GO:0051603	angiogenesis,cysteine-type endopeptidase activity,extracellular space,lysosome,proteolysis involved in cellular protein catabolic process	Biological Process,Molecular Function,Cellular Component,Cellular Component,Biological Process	NA	NA	NA	NA	1.04125	5.475	0.000793279	0.0399573
1136	TR544962|c2_g2_i2	collagen alpha-1(XII) chain-like					NA	NA	NA	NA	3.58165	1.8389	2.58266e-06	0.00273732
1137	TR544962|c2_g4_i1	---NA---					NA	NA	NA	NA	3.39138	0.334867	1.02043e-05	0.00490817
1138	TR544975|c5_g2_i1	---NA---					NA	NA	NA	NA	-1.78633	4.24601	4.29042e-05	0.00931218
1139	TR544999|c2_g3_i10	PREDICTED: uncharacterized protein LOC101857121					NA	NA	NA	NA	2.74642	0.315178	6.83472e-05	0.0118134
1140	TR545015|c1_g3_i2	arrestin domain-containing 3-like		GO:0007165	signal transduction	Biological Process	NA	NA	NA	NA	3.89773	-0.454828	0.000142444	0.0173162
1141	TR545043|c4_g4_i5	---NA---	EC:4.3.3.2	GO:0009058,GO:0016021,GO:0016844	biosynthetic process,integral component of membrane,strictosidine synthase activity	Biological Process,Cellular Component,Molecular Function	NA	NA	NA	NA	2.86203	0.287458	0.000136266	0.0168481
1142	TR545044|c0_g3_i1	PREDICTED: uncharacterized protein LOC105348741					NA	NA	NA	NA	2.66447	1.10387	2.98789e-05	0.00786674
1143	TR545194|c3_g1_i1	PREDICTED: uncharacterized protein LOC101848577					NA	NA	NA	NA	3.70167	2.22631	2.97609e-06	0.00287958
1144	TR545194|c3_g1_i4	Fibrillin-1 precursor					NA	NA	NA	NA	3.59158	1.54129	0.000553941	0.0332918
1145	TR545509|c0_g1_i3	---NA---					NA	NA	NA	NA	-2.77718	1.63421	9.82919e-05	0.0140415
1146	TR545512|c0_g1_i2	---NA---					NA	NA	NA	NA	-1.98856	1.88284	0.000317471	0.0252896
1147	TR545579|c1_g3_i1	phospholipase A2					NA	NA	NA	NA	4.77873	-0.819103	0.000487012	0.0313174
1148	TR545714|c0_g1_i6	calumenin isoform X3		GO:0004857,GO:0005509,GO:0005576,GO:0005789,GO:0005794,GO:0014012,GO:0014070,GO:0019899,GO:0033018,GO:0042470,GO:0043086	enzyme inhibitor activity,calcium ion binding,extracellular region,endoplasmic reticulum membrane,Golgi apparatus,peripheral nervous system axon regeneration,response to organic cyclic compound,enzyme binding,sarcoplasmic reticulum lumen,melanosome,negative regulation of catalytic activity	Molecular Function,Molecular Function,Cellular Component,Cellular Component,Cellular Component,Biological Process,Biological Process,Molecular Function,Cellular Component,Cellular Component,Biological Process	NA	NA	NA	NA	1.622	1.12292	0.00101705	0.0450639
1149	TR545750|c5_g1_i2	uncharacterized abhydrolase domain-containing DDB_G0269086-like isoform X5					NA	NA	NA	NA	2.35569	2.26188	9.12611e-05	0.0136381
1150	TR545769|c1_g3_i7	zinc transporter ZIP9 isoform X1		GO:0016020,GO:0030001	membrane,metal ion transport	Cellular Component,Biological Process	NA	NA	NA	NA	2.26854	1.16497	0.000451425	0.0301715
1151	TR545770|c1_g4_i1	transmembrane 163-like					NA	NA	NA	NA	3.77037	-0.0316825	0.000199114	0.0203181
1152	TR545790|c5_g3_i1	coactosin partial		GO:0003779,GO:0005622	actin binding,intracellular	Molecular Function,Cellular Component	NA	NA	NA	NA	4.15937	-0.931317	0.000702946	0.0373725
1153	TR545798|c1_g3_i1	zinc metallo ase nas-14		GO:0003824,GO:0043167	catalytic activity,ion binding	Molecular Function,Molecular Function	NA	NA	NA	NA	2.75855	-0.308508	0.00120701	0.0483396
1154	TR545798|c1_g3_i6	zinc metallo ase nas-13-like					NA	NA	NA	NA	2.37431	1.66831	9.49601e-06	0.00476007
1155	TR545799|c2_g1_i15	WD repeat-containing 49 isoform X1					NA	NA	NA	NA	-8.89562	0.539418	0.000147331	0.0176574
1156	TR545800|c1_g2_i4	GPI ethanolamine phosphate transferase 3-like		GO:0008152,GO:0016740,GO:0044425	metabolic process,transferase activity,membrane part	Biological Process,Molecular Function,Cellular Component	NA	NA	NA	NA	7.69989	-0.105598	0.00107118	0.0458979
1157	TR545822|c3_g1_i1	---NA---					NA	NA	NA	NA	-2.50845	3.46896	0.000592738	0.0344419
1158	TR545845|c0_g3_i2	---NA---					NA	NA	NA	NA	-1.87646	2.74408	0.000188736	0.020083
1159	TR545866|c1_g1_i1	---NA---					NA	NA	NA	NA	3.47418	4.2407	0.000118365	0.0154862
1160	TR545866|c1_g1_i2	---NA---					NA	NA	NA	NA	4.02786	5.96363	1.63891e-05	0.0060343
1161	TR545866|c1_g1_i3	---NA---					NA	NA	NA	NA	2.9034	6.20123	0.00035363	0.0266393
1162	TR546147|c0_g1_i1	Guanine nucleotide-binding G(o) subunit alpha	EC:3.6.1,EC:3.6.1.15	GO:0003924,GO:0004871,GO:0005525,GO:0007188,GO:0031683,GO:0046872	GTPase activity,signal transducer activity,GTP binding,adenylate cyclase-modulating G-protein coupled receptor signaling pathway,G-protein beta/gamma-subunit complex binding,metal ion binding	Molecular Function,Molecular Function,Molecular Function,Biological Process,Molecular Function,Molecular Function	NA	NA	NA	NA	3.29149	-0.16516	0.000679357	0.0367794
1163	TR546171|c1_g3_i2	---NA---					NA	NA	NA	NA	3.0127	5.85456	3.27183e-05	0.0081125
1164	TR546204|c1_g6_i1	Ubiquitin carboxyl-terminal hydrolase 15	EC:3.4,EC:3.4.19.12	GO:0004843,GO:0006508,GO:0051260	thiol-dependent ubiquitin-specific protease activity,proteolysis,protein homooligomerization	Molecular Function,Biological Process,Biological Process	NA	NA	NA	NA	2.98176	5.56239	1.44853e-06	0.00211929
1165	TR546240|c1_g8_i1	T family of potassium channels 7-like		GO:0006811,GO:0016020	ion transport,membrane	Biological Process,Cellular Component	NA	NA	NA	NA	1.48326	1.8859	0.0012432	0.0491303
1167	TR546289|c1_g1_i10	tropomyosin isoform X6					NA	NA	NA	NA	2.65876	1.96809	4.71399e-05	0.00975762
1168	TR546289|c1_g1_i2	tropomyosin-2-like isoform X4					NA	NA	NA	NA	1.53577	4.70794	4.8602e-05	0.00986192
1169	TR546289|c1_g1_i3	---NA---					NA	NA	NA	NA	5.55861	2.75647	6.60626e-06	0.00400922
1170	TR546289|c1_g1_i4	tropomyosin-2-like isoform X4					NA	NA	NA	NA	1.77545	2.66603	0.000371345	0.0272247
1171	TR546289|c1_g1_i7	tropomyosin-2-like isoform X2					NA	NA	NA	NA	2.57769	3.03704	0.000871485	0.042096
1172	TR546289|c2_g1_i1	---NA---					NA	NA	NA	NA	1.34255	6.79223	0.000372261	0.0272438
1173	TR546300|c0_g3_i1	---NA---					NA	NA	NA	NA	-2.70013	0.943935	0.000558978	0.0334811
1174	TR546300|c0_g4_i1	---NA---					NA	NA	NA	NA	-2.29724	1.65456	0.000415264	0.0289276
1175	TR546320|c1_g9_i1	---NA---					NA	NA	NA	NA	-1.94679	1.48254	0.000995078	0.0446538
1177	TR546498|c1_g1_i1	---NA---					NA	NA	NA	NA	-2.30733	-0.0648842	0.00100102	0.0447348
1179	TR546541|c2_g3_i8	transgelin-3-like isoform X2					NA	NA	NA	NA	4.88428	2.93976	2.27846e-06	0.00258892
1180	TR546618|c2_g1_i6	organic cation transporter -like					NA	NA	NA	NA	-6.73052	-0.961115	0.00104645	0.0454763
1181	TR547034|c0_g2_i2	---NA---					NA	NA	NA	NA	-2.02038	1.13979	0.0005617	0.0334811
1182	TR547048|c0_g1_i1	---NA---					NA	NA	NA	NA	-1.40952	4.20066	0.000460967	0.0305151
1183	TR547236|c1_g1_i1	---NA---					NA	NA	NA	NA	1.25932	5.49133	0.000806074	0.0403333
1184	TR547237|c3_g1_i3	anoctamin-4-like isoform X6		GO:0016020	membrane	Cellular Component	NA	NA	NA	NA	1.97819	1.50052	0.00019788	0.0202652
1185	TR547238|c1_g1_i2	PREDICTED: uncharacterized protein LOC101853426 isoform X1					NA	NA	NA	NA	3.67723	-0.334309	3.22192e-05	0.0081125
1186	TR547243|c5_g1_i4	---NA---					NA	NA	NA	NA	1.28641	2.32419	0.00104239	0.0454304
1187	TR547295|c1_g3_i2	universal minicircle sequence binding		GO:0003676,GO:0046872	nucleic acid binding,metal ion binding	Molecular Function,Molecular Function	NA	NA	NA	NA	-1.13349	6.24622	0.000184202	0.0197267
1189	TR547350|c0_g1_i1	endothelin-converting enzyme 1					NA	NA	NA	NA	1.63467	2.3512	0.000521993	0.0324388
1190	TR547571|c2_g1_i2	---NA---					NA	NA	NA	NA	-1.98964	1.16888	0.00110399	0.046537
1191	TR547839|c1_g1_i3	PREDICTED: serine protease 27-like	EC:3.4.21	GO:0004252,GO:0006508,GO:0016021	serine-type endopeptidase activity,proteolysis,integral component of membrane	Molecular Function,Biological Process,Cellular Component	NA	NA	NA	NA	-1.61475	4.52315	0.000264844	0.0229706
1192	TR547993|c0_g1_i1	pedal peptide 4					NA	NA	NA	NA	3.19309	0.116285	2.64386e-05	0.00748794
1193	TR548115|c6_g3_i1	---NA---					NA	NA	NA	NA	-2.0576	1.93477	0.000141649	0.0172902
1194	TR548260|c0_g2_i3	extensin-like isoform X1					NA	NA	NA	NA	2.91343	1.20521	6.63222e-05	0.0116675
1195	TR548320|c3_g5_i1	---NA---					NA	NA	NA	NA	-2.24578	0.197528	0.000867721	0.0420524
1196	TR548376|c2_g1_i1	---NA---					NA	NA	NA	NA	2.52835	1.39136	0.00015283	0.0180709
1197	TR548378|c3_g1_i2	---NA---					NA	NA	NA	NA	-1.54846	3.96317	0.00114239	0.0471262
1198	TR548457|c1_g2_i1	---NA---					NA	NA	NA	NA	2.61812	-0.0620917	0.000299553	0.0246664
1199	TR548514|c0_g1_i2	---NA---					NA	NA	NA	NA	-2.30418	2.34978	0.000611185	0.0349973
1200	TR548579|c0_g2_i1	ADP-ribosylation factor 6-interacting 1		GO:0016020,GO:0044763	membrane,single-organism cellular process	Cellular Component,Biological Process	NA	NA	NA	NA	6.30442	-0.482683	0.000825011	0.0408145
1201	TR549205|c1_g2_i2	ubiquitin conjugation factor E4 B isoform X3					NA	NA	NA	NA	-6.41741	-0.212194	0.000380239	0.0276693
1202	TR549227|c1_g1_i1	---NA---					NA	NA	NA	NA	-2.25176	2.5527	3.69695e-05	0.00859293
1203	TR549227|c1_g1_i2	---NA---					NA	NA	NA	NA	-1.95876	1.82874	0.000178195	0.0194335
1205	TR549340|c5_g1_i1	---NA---					NA	NA	NA	NA	2.2471	1.62342	0.000229101	0.0215653
1207	TR549514|c1_g1_i2	calmodulin					NA	NA	NA	NA	1.34487	1.805	0.000979245	0.0443089
1208	TR549589|c2_g1_i7	---NA---					NA	NA	NA	NA	-6.78943	-0.739239	4.50549e-06	0.00335474
1209	TR549592|c3_g1_i3	unc-112-related -like					NA	NA	NA	NA	1.74982	3.08382	0.000331275	0.025859
1210	TR549596|c2_g1_i2	---NA---					NA	NA	NA	NA	-1.55027	3.59102	0.000479159	0.0310678
1212	TR549614|c4_g1_i1	---NA---					NA	NA	NA	NA	1.54119	5.01642	0.000233422	0.0216777
1213	TR549631|c0_g1_i2	---NA---					NA	NA	NA	NA	4.08973	2.45724	4.91846e-05	0.00986192
1214	TR549631|c0_g2_i1	PREDICTED: uncharacterized protein LOC101848876					NA	NA	NA	NA	2.3757	5.60293	0.000179687	0.0194823
1216	TR549677|c6_g3_i1	---NA---					NA	NA	NA	NA	2.57139	0.368663	0.000391905	0.0280643
1219	TR549706|c3_g1_i1	---NA---					NA	NA	NA	NA	1.7638	2.14768	0.000758223	0.0389941
1220	TR549740|c1_g3_i1	---NA---					NA	NA	NA	NA	-1.91333	2.42574	0.000350458	0.0265834
1221	TR549764|c0_g1_i5	tubulin polyglutamylase ttll6-like isoform X11					NA	NA	NA	NA	-1.20136	5.6418	0.000959637	0.0440686
1222	TR549776|c0_g1_i2	c-terminal tandem repeated domain in type 4 procollagen					NA	NA	NA	NA	1.75448	6.61889	0.000134728	0.0167155
1223	TR549776|c0_g1_i4	collagen alpha-1(IV) chain					NA	NA	NA	NA	4.69332	-0.724412	4.74684e-05	0.00980121
1224	TR549792|c2_g1_i1	non-alpha nicotinic acetylcholine receptor subunit precursor		GO:0004889,GO:0016021,GO:0030054,GO:0045211,GO:0098655	acetylcholine-gated cation-selective channel activity,integral component of membrane,cell junction,postsynaptic membrane,cation transmembrane transport	Molecular Function,Cellular Component,Cellular Component,Cellular Component,Biological Process	NA	NA	NA	NA	1.80021	1.62433	0.000647552	0.0358915
1225	TR549837|c1_g1_i2	E3 SUMO- ligase 2-like					NA	NA	NA	NA	-7.69071	1.63352	1.10448e-05	0.00507881
1226	TR549898|c5_g2_i5	---NA---					NA	NA	NA	NA	-2.05825	2.94908	0.000236545	0.0218217
1227	TR550124|c1_g1_i3	---NA---					NA	NA	NA	NA	4.17963	-0.838558	0.000609128	0.0349801
1228	TR550291|c1_g5_i1	---NA---					NA	NA	NA	NA	-1.48117	3.22383	0.000617237	0.0351306
1229	TR550326|c1_g1_i1	PREDICTED: uncharacterized protein LOC101858077					NA	NA	NA	NA	1.70865	2.44087	4.13279e-05	0.0090977
1231	TR550361|c2_g3_i2	---NA---					NA	NA	NA	NA	4.26389	-0.544854	2.1098e-05	0.00677832
1232	TR550362|c0_g1_i2	26S proteasome non-ATPase regulatory subunit 8-like					NA	NA	NA	NA	-4.77781	0.202188	0.00099047	0.0445743
1233	TR550375|c3_g1_i2	---NA---					NA	NA	NA	NA	-1.04884	5.44579	0.00107476	0.0460039
1234	TR550843|c1_g1_i1	---NA---					NA	NA	NA	NA	-2.03667	1.66329	0.000141711	0.0172902
1235	TR550860|c3_g2_i1	---NA---					NA	NA	NA	NA	4.25625	2.50088	0.000225525	0.0213981
1236	TR550860|c3_g2_i2	---NA---					NA	NA	NA	NA	5.23705	1.85069	1.42771e-05	0.00550004
1237	TR550860|c3_g2_i5	---NA---					NA	NA	NA	NA	5.22092	1.14918	0.000105362	0.0143962
1238	TR550913|c0_g1_i8	PREDICTED: uncharacterized protein LOC101857327					NA	NA	NA	NA	-8.01408	0.212263	0.000106606	0.0144948
1239	TR550939|c2_g11_i1	---NA---					NA	NA	NA	NA	-1.91677	1.28327	0.000177445	0.0194335
1240	TR550950|c2_g2_i1	allene oxide synthase-lipoxygenase -like		GO:0016491	oxidoreductase activity	Molecular Function	NA	NA	NA	NA	2.59209	-0.540112	0.00068568	0.0369534
1241	TR550963|c0_g4_i1	---NA---					NA	NA	NA	NA	-1.28283	4.35872	0.00108964	0.0463096
1242	TR550963|c0_g5_i1	---NA---					NA	NA	NA	NA	-1.31944	6.05397	0.00120983	0.0483396
1243	TR551014|c5_g1_i3	---NA---					NA	NA	NA	NA	1.54966	3.13847	0.000662636	0.0361328
1244	TR551095|c3_g2_i2	myosin heavy striated muscle-like	EC:3.6.1,EC:3.6.1.15	GO:0003774,GO:0003779,GO:0005516,GO:0005524,GO:0030016,GO:0032982	motor activity,actin binding,calmodulin binding,ATP binding,myofibril,myosin filament	Molecular Function,Molecular Function,Molecular Function,Molecular Function,Cellular Component,Cellular Component	NA	NA	NA	NA	5.13982	-0.612932	0.000360536	0.0269063
1245	TR551205|c0_g2_i5	Na(+) H(+) exchange regulatory cofactor NHE-RF2		GO:0008022,GO:0044464	protein C-terminus binding,cell part	Molecular Function,Cellular Component	NA	NA	NA	NA	2.97361	1.95945	0.000963911	0.0440945
1247	TR551270|c0_g1_i2	Dual specificity phosphatase 7	EC:3.1.3.16,EC:3.1,EC:3.1.3.41,EC:3.1.3	GO:0006470,GO:0008138	protein dephosphorylation,protein tyrosine/serine/threonine phosphatase activity	Biological Process,Molecular Function	NA	NA	NA	NA	2.14551	4.11401	5.26858e-05	0.0103154
1248	TR551382|c0_g1_i1	---NA---					NA	NA	NA	NA	1.41109	5.70129	0.000479135	0.0310678
1249	TR551521|c2_g1_i6	short-chain dehydrogenase					NA	NA	NA	NA	-8.20519	0.511366	0.000297054	0.0246664
1250	TR551542|c0_g2_i4	---NA---					NA	NA	NA	NA	-1.73338	0.907966	0.00101269	0.0449868
1253	TR551954|c0_g4_i1	actin- partial					NA	NA	NA	NA	2.4836	2.04902	0.000395583	0.0281823
1254	TR551997|c5_g1_i1	---NA---					NA	NA	NA	NA	-2.30974	1.81919	0.000490564	0.0314003
1255	TR552044|c0_g1_i2	PREDICTED: uncharacterized protein LOC101846508					NA	NA	NA	NA	2.95292	1.97675	0.000246639	0.0223488
1256	TR552044|c0_g1_i3	PREDICTED: uncharacterized protein LOC101846508					NA	NA	NA	NA	4.52039	0.777863	0.000348464	0.0265289
1257	TR552048|c1_g1_i1	---NA---					NA	NA	NA	NA	1.67521	1.58318	0.00111534	0.0467312
1258	TR552263|c3_g3_i3	---NA---					NA	NA	NA	NA	10.0833	2.68165	6.62679e-06	0.00400922
1259	TR552571|c0_g1_i1	---NA---					NA	NA	NA	NA	1.92248	4.45996	0.000480348	0.0310678
1260	TR552801|c0_g1_i1	---NA---					NA	NA	NA	NA	2.47644	-0.437138	0.000703525	0.0373725
1261	TR552965|c1_g4_i1	PREDICTED: uncharacterized protein LOC101863912	EC:3.4.24	GO:0004222,GO:0006508	metalloendopeptidase activity,proteolysis	Molecular Function,Biological Process	NA	NA	NA	NA	2.27692	1.20699	0.00061355	0.0350646
1262	TR552965|c1_g4_i2	hemagglutinin					NA	NA	NA	NA	2.58538	1.73881	0.000539276	0.0329469
1263	TR552998|c2_g4_i3	---NA---					NA	NA	NA	NA	-3.02231	-0.296641	0.00117849	0.0478124
1264	TR552998|c2_g6_i1	---NA---					NA	NA	NA	NA	-1.75296	4.27771	2.52626e-05	0.0073588
1265	TR553007|c5_g6_i1	---NA---					NA	NA	NA	NA	-1.80423	1.87505	0.000634741	0.0355456
1266	TR553014|c1_g1_i2	PV21_POMCA ame: Full=Perivitellin-2 67 kDa subunit Short= 2 67 kDa subunit Short= 2-67 ame: Full=PV2 MACPF subunit Flags: Precursor					NA	NA	NA	NA	3.33556	1.67824	0.00010032	0.0141182
1267	TR553016|c1_g7_i3	---NA---					NA	NA	NA	NA	-3.54063	-0.578385	0.000447796	0.0300496
1268	TR553027|c0_g1_i1	PREDICTED: uncharacterized protein LOC101855988 isoform X1					NA	NA	NA	NA	3.64423	0.050259	0.000121298	0.0156485
1269	TR553029|c1_g2_i7	probable lysosomal cobalamin transporter					NA	NA	NA	NA	4.4537	-0.854742	0.00012444	0.0158088
1270	TR553034|c2_g1_i1	---NA---					NA	NA	NA	NA	-1.84724	2.97252	0.000295052	0.0246008
1271	TR553038|c1_g1_i3	plastin-2 isoform X2		GO:0005488	binding	Molecular Function	NA	NA	NA	NA	1.36855	3.6356	0.000780538	0.039773
1272	TR553073|c0_g2_i3	monocarboxylate transporter 13-like					NA	NA	NA	NA	-6.67619	-0.551956	1.98591e-05	0.00653161
1273	TR553087|c2_g2_i5	---NA---					NA	NA	NA	NA	4.29549	-0.904527	0.000462173	0.0305316
1274	TR553114|c1_g1_i1	---NA---					NA	NA	NA	NA	-2.2071	1.21297	0.000196304	0.0202652
1275	TR553114|c1_g3_i3	dynein heavy chain partial	EC:3.6.1,EC:3.6.1.3,EC:3.6.1.15	GO:0003777,GO:0005524,GO:0007018,GO:0016887,GO:0030286	microtubule motor activity,ATP binding,microtubule-based movement,ATPase activity,dynein complex	Molecular Function,Molecular Function,Biological Process,Molecular Function,Cellular Component	NA	NA	NA	NA	-2.14581	2.40175	0.000738273	0.0384921
1276	TR553350|c1_g2_i1	1-acyl-sn-glycerol-3-phosphate acyltransferase alpha	EC:2.3.1.51,EC:2.3.1	GO:0003841,GO:0008654,GO:0016021	1-acylglycerol-3-phosphate O-acyltransferase activity,phospholipid biosynthetic process,integral component of membrane	Molecular Function,Biological Process,Cellular Component	NA	NA	NA	NA	2.07242	0.881403	0.000346997	0.0264969
1277	TR553495|c1_g4_i1	---NA---					NA	NA	NA	NA	-2.32448	-0.0762521	0.00119452	0.0481344
1278	TR553501|c1_g1_i2	---NA---					NA	NA	NA	NA	1.75635	3.66787	0.000343994	0.0263603
1279	TR553785|c1_g1_i2	PREDICTED: uncharacterized protein LOC105317471 isoform X3					NA	NA	NA	NA	-2.05923	5.27772	9.31652e-05	0.0137205
1280	TR554126|c2_g1_i6	---NA---					NA	NA	NA	NA	2.36521	0.82532	0.00104565	0.0454763
1283	TR554452|c1_g3_i1	---NA---					NA	NA	NA	NA	4.9522	-1.30237	0.00115632	0.0473516
1285	TR554491|c0_g1_i1	---NA---					NA	NA	NA	NA	2.27712	-0.0190116	0.000969328	0.044114
1286	TR554495|c0_g1_i2	transcriptional regulator ATRX homolog					NA	NA	NA	NA	-6.6206	1.43899	1.06491e-08	0.000126589
1287	TR554512|c4_g1_i6	PREDICTED: uncharacterized protein DDB_G0271670-like					NA	NA	NA	NA	1.47804	4.52691	0.000282878	0.0238486
1288	TR554536|c5_g2_i1	monocarboxylate transporter 12 isoform X2		GO:0016021,GO:0055085	integral component of membrane,transmembrane transport	Cellular Component,Biological Process	NA	NA	NA	NA	7.1768	-0.623434	0.000322419	0.0254893
1289	TR554692|c2_g2_i1	FRIY_LYMSTRecName: Full=Yolk ferritin; Flags: Precursor	EC:1.16.3.1,EC:1.16.3	GO:0004322,GO:0005576,GO:0005623,GO:0006826,GO:0006879,GO:0008199,GO:0055114	ferroxidase activity,extracellular region,cell,iron ion transport,cellular iron ion homeostasis,ferric iron binding,oxidation-reduction process	Molecular Function,Cellular Component,Cellular Component,Biological Process,Biological Process,Molecular Function,Biological Process	NA	NA	NA	NA	3.78022	1.0585	8.87109e-05	0.0134213
1290	TR554719|c5_g2_i6	CTD small phosphatase partial	EC:3.1.3.16,EC:3.1,EC:3.1.3.41	GO:0004721,GO:0006470,GO:0016021	phosphoprotein phosphatase activity,protein dephosphorylation,integral component of membrane	Molecular Function,Biological Process,Cellular Component	NA	NA	NA	NA	2.87018	-0.373441	0.000412686	0.0288727
1291	TR554731|c2_g2_i2	acetyl- mitochondrial	EC:2.3.1.16,EC:2.3.1.9,EC:2.3.1	GO:0003985,GO:0005743,GO:0008152,GO:0046872,GO:0070062	acetyl-CoA C-acetyltransferase activity,mitochondrial inner membrane,metabolic process,metal ion binding,extracellular exosome	Molecular Function,Cellular Component,Biological Process,Molecular Function,Cellular Component	NA	NA	NA	NA	2.01324	2.75214	0.00025749	0.0226809
1292	TR554771|c0_g1_i1	collagen alpha-2(IV) chain-like					NA	NA	NA	NA	2.12913	3.24721	0.000876705	0.0421676
1293	TR554771|c0_g1_i3	collagen alpha-2(IV) chain-like					NA	NA	NA	NA	2.22624	4.15445	0.000923731	0.0433298
1294	TR554771|c0_g1_i4	collagen alpha-2(IV) chain-like					NA	NA	NA	NA	2.42187	3.87057	1.94465e-05	0.00647266
1295	TR554801|c1_g2_i2	PREDICTED: uncharacterized protein LOC101854318 isoform X2					NA	NA	NA	NA	-1.39805	5.73202	0.000515569	0.0322564
1296	TR554803|c3_g1_i1	---NA---					NA	NA	NA	NA	3.52858	-0.643734	0.00041035	0.0287906
1297	TR554803|c3_g5_i1	BPTI Kunitz domain-containing 4-like					NA	NA	NA	NA	2.87098	1.99494	1.54309e-05	0.00583645
1299	TR554963|c2_g3_i6	---NA---					NA	NA	NA	NA	2.75635	3.90181	0.000107073	0.0145109
1300	TR554985|c1_g6_i3	peptidase inhibitor 16					NA	NA	NA	NA	1.56299	2.99267	0.00114187	0.0471262
1301	TR555203|c1_g3_i2	isoform A					NA	NA	NA	NA	4.92762	0.39371	0.000891741	0.0426265
1303	TR555244|c0_g1_i2	PREDICTED: uncharacterized protein LOC101854551					NA	NA	NA	NA	-4.46503	-0.343593	0.000751442	0.0387411
1304	TR555268|c2_g1_i1	NUAK family SNF1-like kinase 1	EC:2.7.11	GO:0004674,GO:0005524,GO:0005634,GO:0005737,GO:0006468,GO:0035556	protein serine/threonine kinase activity,ATP binding,nucleus,cytoplasm,protein phosphorylation,intracellular signal transduction	Molecular Function,Molecular Function,Cellular Component,Cellular Component,Biological Process,Biological Process	NA	NA	NA	NA	2.13194	1.55799	5.72261e-05	0.0107491
1305	TR555279|c3_g3_i9	---NA---					NA	NA	NA	NA	3.9314	-1.07185	0.000919893	0.0433176
1306	TR555288|c0_g3_i7	---NA---					NA	NA	NA	NA	2.29625	3.18105	0.000454413	0.0302982
1307	TR555330|c0_g1_i2	polypeptide N-acetylgalactosaminyltransferase 5-like					NA	NA	NA	NA	2.75551	1.49993	0.000782595	0.0398291
1308	TR555335|c0_g1_i1	---NA---					NA	NA	NA	NA	2.42009	0.356717	0.00104194	0.0454304
1309	TR555339|c1_g1_i1	---NA---					NA	NA	NA	NA	3.62961	3.73088	2.89982e-05	0.00779636
1310	TR555339|c1_g2_i1	---NA---					NA	NA	NA	NA	2.68934	3.41278	0.000135347	0.0167595
1311	TR555375|c1_g5_i2	nuclear hormone receptor HR96-like isoform X14					NA	NA	NA	NA	5.59719	0.0562414	8.95086e-05	0.0135174
1312	TR555403|c1_g1_i1	---NA---					NA	NA	NA	NA	1.85413	0.853629	0.000529479	0.0326316
1314	TR555429|c0_g2_i1	---NA---					NA	NA	NA	NA	1.87677	2.34152	0.000809998	0.0403516
1315	TR555429|c0_g4_i1	---NA---					NA	NA	NA	NA	2.18928	4.43797	4.90021e-05	0.00986192
1316	TR555429|c0_g4_i2	PREDICTED: uncharacterized protein LOC101859634					NA	NA	NA	NA	3.11094	3.75109	0.000430055	0.0294405
1317	TR555429|c0_g4_i4	PREDICTED: uncharacterized protein LOC101859634					NA	NA	NA	NA	2.37813	3.971	0.000341488	0.0263056
1320	TR555529|c2_g1_i1	---NA---					NA	NA	NA	NA	-2.32338	2.60976	8.08592e-05	0.012816
1321	TR555590|c0_g1_i1	---NA---					NA	NA	NA	NA	2.17734	0.944742	0.000370925	0.0272247
1322	TR555643|c3_g6_i2	cell division cycle 20 homolog					NA	NA	NA	NA	-3.28014	0.22242	0.00050374	0.0318516
1323	TR555924|c1_g1_i6	---NA---					NA	NA	NA	NA	4.38469	-0.732478	0.000388711	0.0279801
1324	TR555984|c0_g1_i1	reticulocyte-binding 2 homolog a-like isoform X1		GO:0004842,GO:0005634,GO:0005737,GO:0008270,GO:0016874,GO:0042787	ubiquitin-protein transferase activity,nucleus,cytoplasm,zinc ion binding,ligase activity,protein ubiquitination involved in ubiquitin-dependent protein catabolic process	Molecular Function,Cellular Component,Cellular Component,Molecular Function,Molecular Function,Biological Process	NA	NA	NA	NA	1.15344	3.00482	0.000556058	0.0333839
1326	TR555988|c0_g2_i6	---NA---					NA	NA	NA	NA	-1.62208	4.1137	0.000335634	0.0260527
1327	TR556376|c2_g1_i6	---NA---					NA	NA	NA	NA	4.33303	-0.766266	0.000856435	0.0417241
1328	TR556394|c1_g1_i4	---NA---					NA	NA	NA	NA	3.3719	1.18797	0.00041283	0.0288727
1329	TR556403|c3_g1_i1	myosin heavy chain isoform A	EC:3.6.1,EC:3.6.1.15	GO:0003774,GO:0005524,GO:0016459	motor activity,ATP binding,myosin complex	Molecular Function,Molecular Function,Cellular Component	NA	NA	NA	NA	2.77834	0.177423	0.000929628	0.0434544
1330	TR556403|c3_g2_i2	myosin heavy chain isoform A	EC:3.6.1,EC:3.6.1.15	GO:0003774,GO:0003779,GO:0005524,GO:0016459	motor activity,actin binding,ATP binding,myosin complex	Molecular Function,Molecular Function,Molecular Function,Cellular Component	NA	NA	NA	NA	5.28175	-0.051891	0.000359786	0.0268745
1331	TR556403|c3_g3_i1	myosin heavy striated muscle-like		GO:0000166	nucleotide binding	Molecular Function	NA	NA	NA	NA	3.99642	0.813812	0.000200823	0.0203181
1332	TR556447|c1_g1_i7	max dimerization 1-like isoform X1					NA	NA	NA	NA	1.90148	2.75216	9.12911e-05	0.0136381
1333	TR556449|c2_g1_i1	glyco -N-acetylgalactosamine 3-beta-galactosyltransferase 1-like	EC:2.4.1.122,EC:2.4.1	GO:0016020,GO:0016263,GO:0016266	membrane,glycoprotein-N-acetylgalactosamine 3-beta-galactosyltransferase activity,O-glycan processing	Cellular Component,Molecular Function,Biological Process	NA	NA	NA	NA	6.55445	-1.34672	0.000620839	0.035182
1334	TR556500|c1_g1_i1	Cam partial	EC:1.97.1,EC:2.7.1.127	GO:0000086,GO:0000165,GO:0000922,GO:0001975,GO:0002027,GO:0002576,GO:0005088,GO:0005509,GO:0005513,GO:0005654,GO:0005813,GO:0005829,GO:0005876,GO:0005980,GO:0007190,GO:0007223,GO:0008076,GO:0008179,GO:0008440,GO:0010800,GO:0010801,GO:0010881,GO:0015276,GO:0019901,GO:0019904,GO:0021762,GO:0022400,GO:0030017,GO:0030235,GO:0030426,GO:0031432,GO:0031800,GO:0031954,GO:0031996,GO:0031997,GO:0032465,GO:…	G2/M transition of mitotic cell cycle,MAPK cascade,spindle pole,response to amphetamine,regulation of heart rate,platelet degranulation,Ras guanyl-nucleotide exchange factor activity,calcium ion binding,detection of calcium ion,nucleoplasm,centrosome,cytosol,spindle microtubule,glycogen catabolic process,activation of adenylate cyclase activity,Wnt signaling pathway calcium modulating pathway,vol…	Biological Process,Biological Process,Cellular Component,Biological Process,Biological Process,Biological Process,Molecular Function,Molecular Function,Biological Process,Cellular Component,Cellular Component,Cellular Component,Cellular Component,Biological Process,Biological Process,Biological Process,Cellular Component,Molecular Function,Molecular Function,Biological Process,Biological Process,…	NA	NA	NA	NA	1.14254	3.00254	0.00123478	0.048906
1335	TR556535|c6_g1_i3	WD repeat-containing 16-like					NA	NA	NA	NA	-2.22343	4.41767	0.000102435	0.0142335
1337	TR556577|c2_g1_i1	PREDICTED: uncharacterized protein LOC101851292					NA	NA	NA	NA	7.22439	-0.554185	4.31108e-05	0.00931218
1338	TR556727|c4_g3_i4	---NA---					NA	NA	NA	NA	-4.85664	-0.366368	3.85764e-05	0.00876794
1340	TR556766|c1_g1_i1	otoferlin isoform X2		GO:0005509,GO:0005829,GO:0016021,GO:0016079,GO:0098793	calcium ion binding,cytosol,integral component of membrane,synaptic vesicle exocytosis,presynapse	Molecular Function,Cellular Component,Cellular Component,Biological Process,Cellular Component	NA	NA	NA	NA	2.53812	0.293577	0.000467737	0.0306947
1341	TR556816|c2_g1_i1	lactase-phlorizin hydrolase		GO:0004553,GO:0008152,GO:0016020	hydrolase activity hydrolyzing O-glycosyl compounds,metabolic process,membrane	Molecular Function,Biological Process,Cellular Component	NA	NA	NA	NA	1.43529	4.03319	0.00100636	0.0447862
1342	TR556866|c0_g1_i1	myosin heavy chain isoform A	EC:3.6.1,EC:3.6.1.15	GO:0003774,GO:0003779,GO:0005524,GO:0016459	motor activity,actin binding,ATP binding,myosin complex	Molecular Function,Molecular Function,Molecular Function,Cellular Component	NA	NA	NA	NA	3.42033	-0.0378055	9.43951e-06	0.00476007
1343	TR556866|c0_g1_i2	myosin heavy chain isoform A	EC:3.6.1,EC:3.6.1.15	GO:0003774,GO:0003779,GO:0005524,GO:0016459	motor activity,actin binding,ATP binding,myosin complex	Molecular Function,Molecular Function,Molecular Function,Cellular Component	NA	NA	NA	NA	4.77523	-0.98453	0.000641976	0.0357799
1344	TR556866|c0_g2_i2	myosin heavy chain isoform A		GO:0000166	nucleotide binding	Molecular Function	NA	NA	NA	NA	5.16135	0.48729	0.000268009	0.0231101
1345	TR556866|c0_g2_i3	myosin heavy chain isoform A		GO:0000166	nucleotide binding	Molecular Function	NA	NA	NA	NA	5.86709	0.0270857	1.69767e-06	0.00218913
1346	TR556866|c0_g2_i4	myosin heavy chain		GO:0000166,GO:0005515,GO:0005737,GO:0016459	nucleotide binding,protein binding,cytoplasm,myosin complex	Molecular Function,Molecular Function,Cellular Component,Cellular Component	NA	NA	NA	NA	6.4834	-0.27252	8.40506e-05	0.0130903
1347	TR556866|c0_g3_i2	---NA---					NA	NA	NA	NA	6.43577	-1.35365	0.000128549	0.0161825
1348	TR556876|c1_g5_i7	seleno S		GO:0010033,GO:0016020,GO:0033554,GO:0043229,GO:0044444,GO:0044763,GO:0048519,GO:0050794	response to organic substance,membrane,cellular response to stress,intracellular organelle,cytoplasmic part,single-organism cellular process,negative regulation of biological process,regulation of cellular process	Biological Process,Cellular Component,Biological Process,Cellular Component,Cellular Component,Biological Process,Biological Process,Biological Process	NA	NA	NA	NA	2.46221	0.73048	0.000900249	0.0427618
1349	TR556907|c2_g5_i1	---NA---					NA	NA	NA	NA	-2.10011	0.207673	0.00121442	0.0484437
1350	TR556932|c2_g1_i1	---NA---					NA	NA	NA	NA	-2.24987	-0.410563	0.000374654	0.0273467
1351	TR557176|c4_g1_i2	---NA---					NA	NA	NA	NA	-1.51411	3.44626	0.00090831	0.0428801
1352	TR557234|c2_g2_i3	GTP-binding YPT7		GO:0005488	binding	Molecular Function	NA	NA	NA	NA	-5.78506	-0.389301	2.67324e-05	0.00754043
1354	TR557280|c1_g2_i1	---NA---					NA	NA	NA	NA	3.07787	0.208607	0.000546348	0.0331071
1355	TR557280|c1_g6_i1	---NA---					NA	NA	NA	NA	4.23115	-0.646243	0.000467735	0.0306947
1357	TR557379|c3_g2_i2	tenascin-R-like					NA	NA	NA	NA	4.06444	1.10549	0.000361343	0.0269192
1358	TR557395|c3_g5_i9	succinate--hydroxymethylglutarate -transferase		GO:0003824	catalytic activity	Molecular Function	NA	NA	NA	NA	-7.14474	0.116279	0.000116392	0.0153976
1359	TR557396|c3_g1_i3	Formin partial		GO:0003779,GO:0017048,GO:0030036	actin binding,Rho GTPase binding,actin cytoskeleton organization	Molecular Function,Molecular Function,Biological Process	NA	NA	NA	NA	6.43278	-0.962636	0.00103705	0.0453978
1360	TR557422|c0_g1_i2	---NA---					NA	NA	NA	NA	1.73448	0.827273	0.000652604	0.0358915
1361	TR557551|c0_g5_i1	PREDICTED: uncharacterized protein LOC101863895					NA	NA	NA	NA	2.00275	5.46478	0.000169385	0.0189444
1362	TR557551|c0_g5_i2	PREDICTED: uncharacterized protein LOC101863895					NA	NA	NA	NA	2.27273	2.8497	0.00128281	0.0497963
1363	TR557716|c0_g1_i1	---NA---					NA	NA	NA	NA	4.05608	-0.734091	0.0006708	0.0364109
1364	TR557716|c0_g2_i1	clionin precursor					NA	NA	NA	NA	2.87317	3.1876	2.20695e-05	0.00690384
1365	TR557744|c0_g1_i1	---NA---					NA	NA	NA	NA	2.98109	-0.541973	0.00118418	0.0479424
1366	TR557769|c1_g1_i1	---NA---					NA	NA	NA	NA	1.71204	2.68331	0.00108764	0.0463096
1367	TR557769|c1_g1_i2	---NA---					NA	NA	NA	NA	1.92808	3.55165	2.43127e-05	0.00727729
1368	TR557769|c1_g3_i1	glycine-rich cell wall structural 1-like					NA	NA	NA	NA	3.48003	2.45907	6.84983e-05	0.0118134
1369	TR557769|c2_g1_i2	---NA---					NA	NA	NA	NA	1.74209	3.19518	0.000217475	0.021117
1370	TR557774|c4_g2_i6	---NA---					NA	NA	NA	NA	7.91815	-0.287138	0.000180062	0.0194823
1371	TR557776|c1_g4_i2	T-complex 1 subunit gamma-like		GO:0005524,GO:0005737,GO:0006457,GO:0051082	ATP binding,cytoplasm,protein folding,unfolded protein binding	Molecular Function,Cellular Component,Biological Process,Molecular Function	NA	NA	NA	NA	-7.23318	3.80728	0.000171574	0.0190104
1372	TR557864|c0_g1_i2	---NA---					NA	NA	NA	NA	2.04336	1.62185	0.00115625	0.0473516
1373	TR557864|c0_g1_i3	---NA---					NA	NA	NA	NA	2.48795	5.00708	0.000167967	0.0188875
1374	TR557942|c1_g1_i1	---NA---					NA	NA	NA	NA	7.09353	-0.955569	0.00106322	0.0457455
1375	TR558056|c6_g1_i3	---NA---					NA	NA	NA	NA	-1.99821	1.98428	0.00129594	0.049811
1376	TR558356|c3_g1_i2	AAEL004880- partial					NA	NA	NA	NA	2.23925	1.11464	0.00028111	0.0237936
1377	TR558362|c3_g2_i2	PREDICTED: uncharacterized protein LOC101853038 isoform X1					NA	NA	NA	NA	3.63071	0.81516	0.000357018	0.026757
1378	TR558388|c0_g1_i1	---NA---					NA	NA	NA	NA	2.95632	3.12775	0.000228656	0.0215478
1379	TR558388|c0_g1_i4	---NA---					NA	NA	NA	NA	3.30361	-0.324117	0.000562464	0.0335027
1380	TR558512|c2_g5_i1	filamin-A-like isoform X7					NA	NA	NA	NA	3.5889	0.204996	0.000136532	0.016856
1381	TR558527|c0_g4_i2	---NA---					NA	NA	NA	NA	-2.10071	1.6084	0.000594198	0.0344572
1382	TR558573|c2_g1_i1	---NA---					NA	NA	NA	NA	2.4975	1.78536	4.13629e-06	0.00321668
1383	TR558581|c3_g15_i1	---NA---					NA	NA	NA	NA	-2.28369	2.52841	0.000113646	0.0151063
1384	TR558581|c3_g6_i1	---NA---					NA	NA	NA	NA	-2.27826	3.592	0.00130192	0.0498802
1385	TR558599|c0_g2_i2	coiled-coil domain-containing 92-like					NA	NA	NA	NA	-1.54322	4.87969	0.000531824	0.0326436
1386	TR558627|c1_g1_i1	---NA---					NA	NA	NA	NA	1.47214	2.27985	0.00103134	0.0453586
1387	TR558656|c2_g1_i5	dnaJ homolog subfamily A member 1		GO:0000151,GO:0001664,GO:0005524,GO:0005829,GO:0006457,GO:0007283,GO:0009408,GO:0016020,GO:0030317,GO:0030521,GO:0030544,GO:0031397,GO:0031625,GO:0043065,GO:0043066,GO:0043508,GO:0046872,GO:0050750,GO:0051082,GO:0051087,GO:0051223,GO:0055131,GO:0070062,GO:0070585,GO:1901998	ubiquitin ligase complex,G-protein coupled receptor binding,ATP binding,cytosol,protein folding,spermatogenesis,response to heat,membrane,flagellated sperm motility,androgen receptor signaling pathway,Hsp70 protein binding,negative regulation of protein ubiquitination,ubiquitin protein ligase binding,positive regulation of apoptotic process,negative regulation of apoptotic process,negative regula…	Cellular Component,Molecular Function,Molecular Function,Cellular Component,Biological Process,Biological Process,Biological Process,Cellular Component,Biological Process,Biological Process,Molecular Function,Biological Process,Molecular Function,Biological Process,Biological Process,Biological Process,Molecular Function,Molecular Function,Molecular Function,Molecular Function,Biological Process,…	NA	NA	NA	NA	-9.6279	1.49063	0.00110282	0.0465348
1388	TR558666|c1_g4_i2	PREDICTED: probable tetraspanin tspA-like					NA	NA	NA	NA	1.77402	4.69558	0.000370549	0.0272247
1389	TR558696|c0_g2_i1	---NA---					NA	NA	NA	NA	-1.66094	6.88556	0.000873379	0.0421204
1390	TR558858|c4_g2_i2	---NA---					NA	NA	NA	NA	-2.59494	1.07453	0.000218678	0.0211599
1391	TR559255|c0_g2_i2	---NA---					NA	NA	NA	NA	-1.34011	3.78946	0.000649929	0.0358915
1392	TR559350|c5_g6_i1	actin 1		GO:0005524	ATP binding	Molecular Function	NA	NA	NA	NA	4.22383	1.28183	3.43415e-05	0.00828288
1393	TR559377|c2_g1_i1	---NA---					NA	NA	NA	NA	-2.05258	1.04383	9.77136e-05	0.0140151
1394	TR559505|c3_g1_i7	CTD small phosphatase -like					NA	NA	NA	NA	7.3732	-0.61922	0.000538901	0.0329469
1395	TR559523|c0_g1_i1	filamin-A-like isoform X7					NA	NA	NA	NA	5.20325	0.558031	6.67962e-06	0.00400922
1396	TR559547|c1_g3_i4	sodium calcium exchanger 3-like isoform X1		GO:0005432,GO:0006816,GO:0007154,GO:0016021,GO:0035725	calcium:sodium antiporter activity,calcium ion transport,cell communication,integral component of membrane,sodium ion transmembrane transport	Molecular Function,Biological Process,Biological Process,Cellular Component,Biological Process	NA	NA	NA	NA	4.25885	0.209278	2.46357e-05	0.00730361
1397	TR559565|c2_g1_i1	---NA---					NA	NA	NA	NA	2.24952	1.00848	9.7857e-05	0.0140151
1398	TR559565|c2_g6_i2	---NA---					NA	NA	NA	NA	2.86503	0.236893	7.96099e-05	0.0127306
1399	TR559567|c2_g1_i5	---NA---					NA	NA	NA	NA	-1.89509	3.56005	0.000922438	0.0433298
1400	TR559575|c0_g1_i1	---NA---					NA	NA	NA	NA	-3.0507	1.4655	0.000640179	0.0357044
1401	TR559649|c3_g5_i1	---NA---					NA	NA	NA	NA	-1.71355	7.43429	0.000181351	0.0195471
1403	TR559887|c0_g2_i1	---NA---					NA	NA	NA	NA	-2.80405	2.33758	0.000230255	0.0216007
1404	TR559897|c1_g3_i3	---NA---					NA	NA	NA	NA	3.65165	0.33196	0.0001311	0.0163983
1405	TR559897|c1_g3_i4	---NA---					NA	NA	NA	NA	2.44701	5.72509	1.93551e-05	0.00647266
1407	TR559971|c3_g5_i1	myosin heavy chain	EC:3.6.1,EC:3.6.1.15	GO:0003774,GO:0003779,GO:0005516,GO:0005524,GO:0030016,GO:0032982	motor activity,actin binding,calmodulin binding,ATP binding,myofibril,myosin filament	Molecular Function,Molecular Function,Molecular Function,Molecular Function,Cellular Component,Cellular Component	NA	NA	NA	NA	7.78308	-0.895716	3.50657e-05	0.0084088
1408	TR559971|c3_g6_i1	myosin heavy chain	EC:3.6.1,EC:3.6.1.15	GO:0003774,GO:0003779,GO:0005516,GO:0005524,GO:0030016,GO:0032982	motor activity,actin binding,calmodulin binding,ATP binding,myofibril,myosin filament	Molecular Function,Molecular Function,Molecular Function,Molecular Function,Cellular Component,Cellular Component	NA	NA	NA	NA	2.79951	-0.613877	0.00112267	0.0468501
1409	TR559978|c0_g1_i1	PREDICTED: uncharacterized protein LOC101852657 isoform X5					NA	NA	NA	NA	3.79567	0.286291	0.0011712	0.0477494
1410	TR559978|c0_g1_i2	PREDICTED: uncharacterized protein LOC101852657 isoform X5					NA	NA	NA	NA	6.17481	-0.0123746	9.38359e-06	0.00476007
1412	TR560045|c2_g3_i6	---NA---					NA	NA	NA	NA	4.81647	1.23459	0.000489216	0.0313864
1413	TR560109|c5_g5_i1	---NA---					NA	NA	NA	NA	2.71048	-0.0416494	0.00108345	0.0462333
1414	TR560111|c2_g2_i1	I-type lectin 5					NA	NA	NA	NA	7.77486	0.652824	6.43107e-05	0.0114651
1415	TR560111|c2_g2_i2	I-type lectin 5					NA	NA	NA	NA	6.82685	0.116327	0.000349531	0.0265834
1416	TR560146|c0_g1_i6	PREDICTED: uncharacterized protein LOC101855265 isoform X2					NA	NA	NA	NA	-8.12149	0.862323	0.00089927	0.0427618
1418	TR560208|c2_g1_i2	piccolo-like isoform X3					NA	NA	NA	NA	4.77563	-0.582469	4.37328e-05	0.00931218
1420	TR560312|c5_g2_i1	PREDICTED: uncharacterized protein LOC101857427					NA	NA	NA	NA	-2.04246	1.77028	0.000546727	0.0331071
1421	TR560321|c1_g1_i3	insulin-like growth factor-binding -related 1		GO:0050794	regulation of cellular process	Biological Process	NA	NA	NA	NA	3.19143	2.69079	8.8508e-06	0.00462333
1422	TR560321|c1_g1_i5	kazal-type serine protease inhibitor domain-containing 1-like					NA	NA	NA	NA	7.74955	2.04141	5.88e-07	0.00116495
1423	TR560321|c1_g1_i6	kazal-type serine protease inhibitor domain-containing 1-like					NA	NA	NA	NA	5.63044	1.76161	0.00075766	0.0389941
1424	TR560341|c1_g1_i1	contactin-like					NA	NA	NA	NA	2.14213	1.597	0.000565931	0.0336493
1426	TR560380|c2_g4_i1	PREDICTED: uncharacterized protein LOC101862247 isoform X1					NA	NA	NA	NA	1.86253	1.79261	0.000425566	0.0293838
1427	TR560571|c2_g2_i7	sodium- and chloride-dependent creatine transporter 1-like		GO:0005328,GO:0006836,GO:0016021,GO:0055085	neurotransmitter:sodium symporter activity,neurotransmitter transport,integral component of membrane,transmembrane transport	Molecular Function,Biological Process,Cellular Component,Biological Process	NA	NA	NA	NA	-5.52253	0.290773	0.000416166	0.0289545
1428	TR560583|c0_g4_i2	ubiquitin-conjugating enzyme E2 H		GO:0005524	ATP binding	Molecular Function	NA	NA	NA	NA	3.16959	-0.638898	0.00086997	0.042096
1429	TR560583|c0_g4_i3	ubiquitin-conjugating enzyme E2 H		GO:0005524,GO:0005737,GO:0006511,GO:0016567,GO:0031625,GO:0061630	ATP binding,cytoplasm,ubiquitin-dependent protein catabolic process,protein ubiquitination,ubiquitin protein ligase binding,ubiquitin protein ligase activity	Molecular Function,Cellular Component,Biological Process,Biological Process,Molecular Function,Molecular Function	NA	NA	NA	NA	1.65754	2.59083	0.000967246	0.044114
1430	TR560608|c2_g3_i2	---NA---					NA	NA	NA	NA	-1.76218	1.94949	0.000991538	0.0445773
1431	TR560629|c1_g3_i1	---NA---					NA	NA	NA	NA	-1.38341	1.41015	0.00128988	0.0497963
1432	TR560634|c2_g1_i5	proline-rich proteoglycan 2-like					NA	NA	NA	NA	1.0235	3.67553	0.000878106	0.0421676
1434	TR560689|c1_g1_i3	rhophilin-2-B-like isoform X1					NA	NA	NA	NA	6.56283	-1.03281	0.000823409	0.040808
1435	TR560748|c3_g1_i3	fatty acid desaturase 2-like isoform X1		GO:0006629,GO:0016021,GO:0016491,GO:0055114	lipid metabolic process,integral component of membrane,oxidoreductase activity,oxidation-reduction process	Biological Process,Cellular Component,Molecular Function,Biological Process	NA	NA	NA	NA	1.51365	1.55569	0.00109052	0.0463096
1436	TR560771|c0_g1_i4	CD59 glyco		GO:0016021	integral component of membrane	Cellular Component	NA	NA	NA	NA	5.35223	0.49052	0.000961675	0.0440734
1438	TR560994|c5_g1_i4	---NA---					NA	NA	NA	NA	4.20534	-0.386445	0.000229888	0.021596
1439	TR561041|c6_g4_i10	---NA---					NA	NA	NA	NA	2.38608	0.304929	0.000244339	0.0222204
1441	TR561133|c0_g1_i1	---NA---					NA	NA	NA	NA	-2.41571	0.383048	0.000235547	0.0217935
1442	TR561201|c1_g1_i2	---NA---					NA	NA	NA	NA	4.7538	-0.641086	0.000695648	0.0373215
1443	TR561204|c0_g1_i5	membrane metallo-endopeptidase-like 1 isoform X2					NA	NA	NA	NA	7.70412	-0.147531	0.000627716	0.0354418
1444	TR561311|c4_g2_i2	---NA---					NA	NA	NA	NA	2.06182	-0.466638	0.00127079	0.0496451
1445	TR561340|c0_g1_i2	tyrosinase -like					NA	NA	NA	NA	2.583	1.60055	0.000235217	0.0217935
1447	TR561375|c3_g4_i2	---NA---					NA	NA	NA	NA	3.6517	1.47488	1.05741e-05	0.00502788
1448	TR561375|c3_g4_i3	---NA---					NA	NA	NA	NA	2.7773	1.91722	0.000192427	0.0202045
1449	TR561387|c1_g1_i2	PREDICTED: SCO-spondin-like					NA	NA	NA	NA	2.78408	4.98154	3.2654e-05	0.0081125
1450	TR561560|c2_g1_i1	Carbohydrate sulfotransferase 11					NA	NA	NA	NA	5.67051	-0.321932	5.02127e-05	0.0100198
1452	TR561685|c1_g2_i7	PREDICTED: uncharacterized protein ZK1073.1-like isoform X3					NA	NA	NA	NA	1.64985	4.78521	7.08895e-05	0.011873
1453	TR561689|c5_g3_i2	transmembrane 59-like					NA	NA	NA	NA	1.30278	5.26423	0.00129041	0.0497963
1454	TR561699|c2_g1_i1	reticulocalbin-2					NA	NA	NA	NA	2.38154	1.85648	0.000211827	0.0207858
1455	TR561700|c0_g1_i2	---NA---					NA	NA	NA	NA	-2.86219	0.724875	0.00055697	0.0334146
1456	TR561723|c4_g3_i1	---NA---					NA	NA	NA	NA	-1.67463	1.463	0.00100548	0.0447862
1457	TR561739|c1_g2_i1	microprocessor complex subunit DGCR8-like					NA	NA	NA	NA	6.00107	1.18023	4.22509e-09	8.78934e-05
1458	TR561758|c3_g1_i1	calcium-transporting ATPase sarcoplasmic endoplasmic reticulum type-like	EC:3.6.1,EC:3.6.1.3,EC:3.6.3.8,EC:3.6.1.15	GO:0005388,GO:0005524,GO:0016021,GO:0033017,GO:0046872,GO:0070588	calcium-transporting ATPase activity,ATP binding,integral component of membrane,sarcoplasmic reticulum membrane,metal ion binding,calcium ion transmembrane transport	Molecular Function,Molecular Function,Cellular Component,Cellular Component,Molecular Function,Biological Process	NA	NA	NA	NA	1.46007	5.06943	0.000283661	0.0238662
1459	TR561766|c3_g3_i7	geranylgeranyl pyrophosphate synthase	EC:2.5.1,EC:2.5.1.29,EC:2.5.1.10,EC:2.5.1.1	GO:0004161,GO:0004311,GO:0004337,GO:0005737,GO:0033384,GO:0033386,GO:0045337,GO:0046872	dimethylallyltranstransferase activity,farnesyltranstransferase activity,geranyltranstransferase activity,cytoplasm,geranyl diphosphate biosynthetic process,geranylgeranyl diphosphate biosynthetic process,farnesyl diphosphate biosynthetic process,metal ion binding	Molecular Function,Molecular Function,Molecular Function,Cellular Component,Biological Process,Biological Process,Biological Process,Molecular Function	NA	NA	NA	NA	7.1613	0.130993	0.000934969	0.0435853
1460	TR561769|c1_g2_i1	---NA---					NA	NA	NA	NA	-1.63962	6.01667	0.000384263	0.0277909
1461	TR561809|c2_g1_i1	---NA---					NA	NA	NA	NA	5.59769	-0.616489	1.21111e-05	0.00518655
1462	TR561845|c2_g2_i4	peroxisomal acyl-coenzyme A oxidase 3	EC:1.3.99.3,EC:1.3.3.6,EC:1.3.3	GO:0000062,GO:0003995,GO:0005777,GO:0009055,GO:0016402,GO:0033539,GO:0050660,GO:0052890,GO:0055088	fatty-acyl-CoA binding,acyl-CoA dehydrogenase activity,peroxisome,electron carrier activity,pristanoyl-CoA oxidase activity,fatty acid beta-oxidation using acyl-CoA dehydrogenase,flavin adenine dinucleotide binding,oxidoreductase activity acting on the CH-CH group of donors with a flavin as acceptor,lipid homeostasis	Molecular Function,Molecular Function,Cellular Component,Molecular Function,Molecular Function,Biological Process,Molecular Function,Molecular Function,Biological Process	NA	NA	NA	NA	9.21401	0.628903	0.000973941	0.0441651
1463	TR561859|c1_g1_i6	Defline double C2 domain		GO:0005488	binding	Molecular Function	NA	NA	NA	NA	-6.7393	0.296018	0.0012581	0.0493979
1464	TR561881|c6_g2_i3	---NA---					NA	NA	NA	NA	-1.70235	2.22249	0.00128656	0.0497963
1465	TR561906|c1_g1_i1	---NA---					NA	NA	NA	NA	-1.25116	1.99187	0.000899318	0.0427618
1466	TR561930|c1_g2_i2	---NA---					NA	NA	NA	NA	2.09349	1.62819	0.000820622	0.0407184
1467	TR562408|c0_g1_i2	---NA---					NA	NA	NA	NA	2.48883	7.76081	0.000896024	0.0427028
1468	TR562443|c0_g2_i1	---NA---					NA	NA	NA	NA	5.75406	-1.17062	0.00107669	0.0460631
1469	TR562526|c0_g3_i4	PREDICTED: transcription factor Sp3-like isoform X2					NA	NA	NA	NA	5.97332	-0.750181	0.00104839	0.0454763
1470	TR562589|c2_g9_i1	---NA---					NA	NA	NA	NA	-1.80234	1.93452	0.000222935	0.0212981
1471	TR562627|c1_g3_i11	---NA---					NA	NA	NA	NA	2.08511	1.73189	5.00794e-06	0.00347945
1472	TR562659|c4_g2_i2	---NA---					NA	NA	NA	NA	3.63434	2.35893	0.000328885	0.025859
1473	TR562672|c2_g4_i3	---NA---					NA	NA	NA	NA	2.42412	1.95038	0.000227938	0.0215261
1474	TR562672|c2_g5_i1	---NA---					NA	NA	NA	NA	4.88032	0.048085	0.000370439	0.0272247
1475	TR562672|c2_g6_i1	---NA---					NA	NA	NA	NA	2.93055	0.105164	0.000519747	0.032392
1476	TR562680|c1_g2_i4	peptidyl-prolyl cis-trans isomerase B	EC:5.2.1.8	GO:0000413,GO:0003755,GO:0032403,GO:0032991,GO:0043231,GO:0044444,GO:0048518,GO:0061077,GO:0065008	protein peptidyl-prolyl isomerization,peptidyl-prolyl cis-trans isomerase activity,protein complex binding,macromolecular complex,intracellular membrane-bounded organelle,cytoplasmic part,positive regulation of biological process,chaperone-mediated protein folding,regulation of biological quality	Biological Process,Molecular Function,Molecular Function,Cellular Component,Cellular Component,Cellular Component,Biological Process,Biological Process,Biological Process	NA	NA	NA	NA	3.48425	0.885938	0.000891499	0.0426265
1477	TR562711|c3_g1_i3	---NA---					NA	NA	NA	NA	-2.39956	0.12076	9.51892e-05	0.0138234
1478	TR562714|c2_g9_i3	serine arginine repetitive matrix 2-like					NA	NA	NA	NA	1.62541	0.679002	0.00120887	0.0483396
1480	TR562755|c1_g4_i1	dystroglycan-like					NA	NA	NA	NA	1.98859	1.56228	0.00105138	0.0455182
1481	TR563023|c2_g2_i1	---NA---					NA	NA	NA	NA	2.65	0.890265	0.000592563	0.0344419
1482	TR563039|c4_g1_i1	---NA---					NA	NA	NA	NA	-3.02699	0.386744	0.000442842	0.0298134
1483	TR563143|c0_g1_i2	---NA---					NA	NA	NA	NA	2.53966	0.332167	0.00129956	0.0498562
1484	TR563251|c1_g4_i1	---NA---					NA	NA	NA	NA	-2.08558	2.4632	0.000254237	0.0226693
1485	TR563253|c0_g1_i1	PREDICTED: uncharacterized protein LOC101863895					NA	NA	NA	NA	2.69988	3.19099	1.82577e-05	0.00633016
1486	TR563277|c1_g2_i4	---NA---					NA	NA	NA	NA	2.12204	4.43891	4.04343e-06	0.00317413
1487	TR563301|c4_g1_i2	transmembrane 39A-like isoform X1					NA	NA	NA	NA	-3.45238	2.10477	0.000167609	0.0188875
1488	TR563301|c4_g1_i4	transmembrane 39A-like isoform X2		GO:0016020	membrane	Cellular Component	NA	NA	NA	NA	1.40789	3.22756	0.000262163	0.0229117
1490	TR563437|c3_g1_i2	---NA---					NA	NA	NA	NA	4.27468	-0.850194	0.000311517	0.0251516
1491	TR563461|c1_g1_i2	---NA---					NA	NA	NA	NA	2.41472	6.867	0.000163575	0.0187224
1492	TR563461|c1_g1_i4	---NA---					NA	NA	NA	NA	7.40707	2.97638	4.14204e-07	0.00105905
1493	TR563461|c1_g1_i8	---NA---					NA	NA	NA	NA	4.8666	-0.129508	0.000633858	0.0355456
1494	TR563461|c1_g1_i9	---NA---					NA	NA	NA	NA	3.77492	6.62427	8.98896e-05	0.0135259
1495	TR563477|c0_g1_i1	---NA---					NA	NA	NA	NA	3.91357	0.20388	0.000456151	0.0303412
1496	TR563477|c0_g2_i1	---NA---					NA	NA	NA	NA	2.74045	2.24076	0.00105223	0.0455314
1497	TR563487|c1_g3_i4	---NA---					NA	NA	NA	NA	4.35644	-0.927733	0.00104931	0.0454763
1498	TR563532|c1_g4_i3	transcription factor 15-like		GO:0005488	binding	Molecular Function	NA	NA	NA	NA	2.55947	0.625896	0.000352386	0.0266325
1499	TR563539|c1_g3_i3	---NA---					NA	NA	NA	NA	2.54887	-0.138744	0.000431544	0.0294821
1500	TR563543|c2_g6_i1	dentin sialophospho -like					NA	NA	NA	NA	2.42751	0.199447	0.000823223	0.040808
1501	TR563626|c1_g5_i1	---NA---					NA	NA	NA	NA	1.93361	0.465025	0.000318012	0.0252896
1502	TR563772|c1_g2_i2	---NA---					NA	NA	NA	NA	3.22679	1.67643	0.000142287	0.0173162
1503	TR563772|c1_g2_i3	SCP_APLCA ame: Full=Small cardioactive peptides Contains: ame: Full=Small cardioactive peptide B Short=SCP B Contains: ame: Full=Small cardioactive peptide A Short=SCP A Flags: Precursor					NA	NA	NA	NA	2.68582	1.70462	7.81668e-06	0.00436533
1504	TR563795|c4_g1_i2	---NA---					NA	NA	NA	NA	2.78118	1.86363	9.28799e-05	0.0137205
1505	TR563981|c0_g1_i1	methylmalonate-semialdehyde dehydrogenase [acylating] mitochondrial	EC:1.2.1.27,EC:1.2.1.3,EC:1.2.1.18	GO:0004029,GO:0004491,GO:0018478,GO:0055114	aldehyde dehydrogenase (NAD) activity,methylmalonate-semialdehyde dehydrogenase (acylating) activity,malonate-semialdehyde dehydrogenase (acetylating) activity,oxidation-reduction process	Molecular Function,Molecular Function,Molecular Function,Biological Process	NA	NA	NA	NA	1.04964	5.73427	0.000560803	0.0334811
1506	TR564016|c0_g1_i1	laminin subunit beta-1-like					NA	NA	NA	NA	1.94863	2.51206	0.00097658	0.0442159
1507	TR564085|c0_g2_i1	---NA---					NA	NA	NA	NA	2.54618	-0.398711	0.000271018	0.0232492
1508	TR564085|c0_g4_i6	---NA---					NA	NA	NA	NA	2.80681	2.34194	4.65648e-05	0.00971104
1509	TR564103|c0_g1_i3	---NA---					NA	NA	NA	NA	-3.94777	-0.383727	0.000530193	0.0326316
1510	TR564181|c0_g1_i2	Kyphoscoliosis peptidase					NA	NA	NA	NA	1.98443	1.06887	0.00117773	0.0478124
1511	TR564226|c0_g1_i4	calmodulin 5					NA	NA	NA	NA	2.23335	3.95105	9.55686e-06	0.00476189
1512	TR564268|c3_g1_i1	---NA---					NA	NA	NA	NA	4.73623	0.390581	4.38278e-06	0.00334583
1513	TR564268|c4_g2_i1	---NA---					NA	NA	NA	NA	3.04946	0.730192	0.000308765	0.0250172
1514	TR564268|c4_g2_i2	---NA---					NA	NA	NA	NA	4.18511	1.05471	0.000233024	0.0216777
1515	TR564297|c2_g3_i1	---NA---					NA	NA	NA	NA	1.74395	1.29093	0.000552947	0.0332879
1516	TR564387|c6_g4_i1	---NA---					NA	NA	NA	NA	2.54778	-0.0406773	0.000158918	0.0184689
1517	TR564461|c2_g3_i1	---NA---					NA	NA	NA	NA	2.06269	3.60013	0.000314794	0.0252224
1518	TR564516|c0_g1_i7	---NA---					NA	NA	NA	NA	6.57287	2.71987	6.17842e-06	0.00392452
1519	TR564531|c0_g1_i2	---NA---					NA	NA	NA	NA	-2.51391	2.24636	4.14574e-05	0.00910213
1520	TR564536|c2_g3_i5	Ceramide glucosyltransferase		GO:0016020,GO:0016740	membrane,transferase activity	Cellular Component,Molecular Function	NA	NA	NA	NA	1.44324	4.07275	0.000833475	0.041111
1521	TR564746|c0_g1_i1	---NA---					NA	NA	NA	NA	-1.58741	2.48421	0.00047085	0.0308503
1522	TR564858|c0_g1_i1	PREDICTED: uncharacterized protein LOC101852108					NA	NA	NA	NA	3.21483	-0.490314	0.000272845	0.0233818
1523	TR564880|c1_g3_i3	titin-like isoform X5					NA	NA	NA	NA	2.61806	3.3214	2.45351e-05	0.00730361
1524	TR564880|c1_g3_i4	titin-like isoform X5					NA	NA	NA	NA	2.6237	2.76006	0.00129493	0.049811
1525	TR564890|c3_g1_i1	---NA---					NA	NA	NA	NA	3.55199	4.28113	3.23627e-06	0.00292124
1526	TR564890|c3_g1_i5	---NA---					NA	NA	NA	NA	4.19766	2.79204	4.54958e-05	0.0096085
1527	TR564890|c3_g2_i1	---NA---					NA	NA	NA	NA	3.62747	2.92311	0.000140862	0.0172508
1528	TR565058|c0_g2_i3	CD151 antigen-like		GO:0016020	membrane	Cellular Component	NA	NA	NA	NA	2.09508	0.887411	0.00127069	0.0496451
1530	TR565105|c3_g2_i6	insulin-degrading enzyme isoform X1	EC:3.4.24	GO:0004222,GO:0005739,GO:0005782,GO:0005829,GO:0008270,GO:0016485,GO:0043171,GO:0051603	metalloendopeptidase activity,mitochondrion,peroxisomal matrix,cytosol,zinc ion binding,protein processing,peptide catabolic process,proteolysis involved in cellular protein catabolic process	Molecular Function,Cellular Component,Cellular Component,Cellular Component,Molecular Function,Biological Process,Biological Process,Biological Process	NA	NA	NA	NA	-8.83827	0.816534	0.000137603	0.0169293
1531	TR565123|c1_g2_i1	---NA---					NA	NA	NA	NA	-1.56414	4.09096	0.00073921	0.0384921
1532	TR565174|c3_g1_i1	tektin-2-like isoform X1					NA	NA	NA	NA	-1.00421	6.07632	0.000991608	0.0445773
1533	TR565182|c0_g3_i4	---NA---					NA	NA	NA	NA	-4.83761	-0.220885	0.00051192	0.0321107
1535	TR565248|c0_g1_i2	---NA---					NA	NA	NA	NA	-2.19752	1.10599	0.000637432	0.0355982
1536	TR565387|c1_g1_i1	---NA---					NA	NA	NA	NA	2.93951	2.0248	0.000887878	0.0425093
1537	TR565387|c2_g3_i8	---NA---					NA	NA	NA	NA	3.63642	-0.666881	0.00125325	0.0492835
1538	TR565635|c0_g1_i3	PREDICTED: uncharacterized protein LOC101851373					NA	NA	NA	NA	2.49027	2.86898	0.0011775	0.0478124
1539	TR565846|c2_g2_i2	---NA---					NA	NA	NA	NA	-2.32424	1.47804	0.000389352	0.0279843
1540	TR565846|c2_g3_i3	---NA---					NA	NA	NA	NA	-2.61533	1.30795	5.56981e-06	0.00364937
1542	TR565859|c3_g1_i1	---NA---					NA	NA	NA	NA	-3.79491	-0.00859614	0.000145723	0.0175326
1543	TR565900|c3_g1_i10	nuclear pore complex Nup133-like					NA	NA	NA	NA	5.92691	2.42341	1.01566e-05	0.00490817
1545	TR565900|c3_g1_i7	nuclear pore complex Nup133-like					NA	NA	NA	NA	7.3555	0.592245	0.00130315	0.0498817
1546	TR565987|c0_g1_i1	cell wall AWA1-like					NA	NA	NA	NA	7.31748	-0.547922	2.99416e-05	0.00786674
1547	TR566252|c0_g1_i2	unc-93 homolog A					NA	NA	NA	NA	3.09526	2.84678	6.94356e-05	0.011834
1548	TR566263|c0_g1_i1	---NA---					NA	NA	NA	NA	-1.83614	4.55043	8.9336e-06	0.00462333
1549	TR566346|c4_g4_i1	---NA---					NA	NA	NA	NA	1.87764	1.1536	5.32948e-05	0.010343
1550	TR566353|c1_g8_i1	phosphoenolpyruvate phosphomutase	EC:5.4.2.9	GO:0005737,GO:0006097,GO:0032923,GO:0046872,GO:0046912,GO:0050188	cytoplasm,glyoxylate cycle,organic phosphonate biosynthetic process,metal ion binding,transferase activity transferring acyl groups acyl groups converted into alkyl on transfer,phosphoenolpyruvate mutase activity	Cellular Component,Biological Process,Biological Process,Molecular Function,Molecular Function,Molecular Function	NA	NA	NA	NA	1.9865	1.52107	2.02049e-05	0.00659322
1551	TR566354|c5_g1_i1	---NA---					NA	NA	NA	NA	4.89045	-0.797059	0.000548893	0.0331071
1552	TR566400|c3_g1_i5	AN1-type zinc finger 4-like isoform X1		GO:0046872	metal ion binding	Molecular Function	NA	NA	NA	NA	-1.39206	5.51611	0.000118096	0.0154854
1553	TR566605|c0_g1_i1	Ig-like and fibronectin type-III domain-containing					NA	NA	NA	NA	5.30827	0.22382	4.63086e-05	0.00971104
1554	TR566763|c3_g2_i1	---NA---					NA	NA	NA	NA	3.76003	0.406786	0.000859023	0.0418013
1555	TR566829|c1_g1_i2	PREDICTED: uncharacterized protein LOC101848876					NA	NA	NA	NA	4.7775	5.83437	5.30675e-06	0.00356113
1556	TR566829|c1_g1_i3	PREDICTED: uncharacterized protein LOC101848876					NA	NA	NA	NA	6.23607	5.95878	5.51513e-05	0.0105016
1557	TR567016|c0_g1_i1	---NA---					NA	NA	NA	NA	-1.60064	3.00886	0.0012336	0.048904
1558	TR567094|c8_g1_i1	---NA---					NA	NA	NA	NA	-1.88433	8.09697	7.11999e-05	0.011873
1559	TR567145|c3_g1_i6	28S ribosomal mitochondrial					NA	NA	NA	NA	-5.89471	0.183911	0.000804645	0.0403103
1561	TR567381|c3_g1_i1	---NA---					NA	NA	NA	NA	3.30242	-0.303586	0.000409123	0.0287287
1562	TR567468|c1_g3_i3	antistasin-like isoform X1		GO:0010466,GO:0030414	negative regulation of peptidase activity,peptidase inhibitor activity	Biological Process,Molecular Function	NA	NA	NA	NA	4.44694	-0.283674	1.18825e-05	0.00515688
1563	TR567499|c1_g1_i1	---NA---					NA	NA	NA	NA	-2.00826	2.56595	0.000440884	0.0298077
1564	TR567685|c1_g1_i7	tricarboxylate transport mitochondrial precursor		GO:0003735,GO:0006412,GO:0016021,GO:0055085	structural constituent of ribosome,translation,integral component of membrane,transmembrane transport	Molecular Function,Biological Process,Cellular Component,Biological Process	NA	NA	NA	NA	4.05864	0.227092	9.89601e-06	0.00484386
1565	TR567724|c2_g1_i1	mucin isoform X2					NA	NA	NA	NA	2.6552	2.31277	0.000223586	0.0213114
1567	TR567745|c0_g4_i10	---NA---					NA	NA	NA	NA	5.9716	-1.22173	0.000294215	0.0245803
1568	TR567747|c1_g1_i1	---NA---					NA	NA	NA	NA	4.19528	1.31065	1.01017e-05	0.00490817
1569	TR567747|c3_g1_i1	---NA---					NA	NA	NA	NA	4.81867	5.80887	3.18477e-05	0.00807952
1570	TR567747|c3_g4_i1	---NA---					NA	NA	NA	NA	2.58183	9.96006	1.72578e-05	0.00616326
1571	TR567747|c3_g4_i2	---NA---					NA	NA	NA	NA	4.9039	4.38667	0.000350996	0.0265999
1572	TR567747|c3_g4_i3	---NA---					NA	NA	NA	NA	3.32739	5.89867	0.000299202	0.0246664
1573	TR567750|c3_g2_i1	---NA---					NA	NA	NA	NA	6.56968	-0.817233	0.000548758	0.0331071
1574	TR567799|c2_g2_i1	---NA---					NA	NA	NA	NA	-1.98963	5.11815	3.41343e-05	0.00826246
1575	TR567906|c1_g1_i1	---NA---					NA	NA	NA	NA	-2.28451	0.973324	0.00096915	0.044114
1576	TR567926|c2_g4_i1	secreted protein					NA	NA	NA	NA	3.04479	1.01974	0.000718498	0.0379118
1577	TR567933|c1_g2_i2	PREDICTED: peptidyl-prolyl cis-trans isomerase-like	EC:5.2.1.8,EC:3.6.1,EC:3.6.1.15	GO:0000413,GO:0003755,GO:0003924,GO:0005200,GO:0005525,GO:0005737,GO:0005874,GO:0006457,GO:0007017	protein peptidyl-prolyl isomerization,peptidyl-prolyl cis-trans isomerase activity,GTPase activity,structural constituent of cytoskeleton,GTP binding,cytoplasm,microtubule,protein folding,microtubule-based process	Biological Process,Molecular Function,Molecular Function,Molecular Function,Molecular Function,Cellular Component,Cellular Component,Biological Process,Biological Process	NA	NA	NA	NA	3.28684	6.15315	0.000277041	0.0235899
1578	TR568183|c3_g1_i1	---NA---					NA	NA	NA	NA	2.54429	0.902994	0.000178031	0.0194335
1579	TR568410|c1_g1_i2	---NA---					NA	NA	NA	NA	4.21019	2.60033	1.39688e-05	0.00550004
1580	TR568410|c1_g1_i4	---NA---					NA	NA	NA	NA	3.83886	1.61862	6.2685e-05	0.0112902
1581	TR568429|c1_g6_i4	PREDICTED: uncharacterized protein LOC101845633 isoform X2					NA	NA	NA	NA	-1.96555	3.16934	0.000406535	0.0286879
1582	TR568473|c2_g1_i5	TLC domain-containing 2		GO:0016021	integral component of membrane	Cellular Component	NA	NA	NA	NA	3.89373	0.24822	3.0112e-05	0.00786674
1584	TR568568|c6_g1_i5	glutaryl- mitochondrial	EC:1.3.99.3,EC:1.3.99.7	GO:0000062,GO:0004361,GO:0005739,GO:0009055,GO:0033539,GO:0050660,GO:0052890,GO:0055088	fatty-acyl-CoA binding,glutaryl-CoA dehydrogenase activity,mitochondrion,electron carrier activity,fatty acid beta-oxidation using acyl-CoA dehydrogenase,flavin adenine dinucleotide binding,oxidoreductase activity acting on the CH-CH group of donors with a flavin as acceptor,lipid homeostasis	Molecular Function,Molecular Function,Cellular Component,Molecular Function,Biological Process,Molecular Function,Molecular Function,Biological Process	NA	NA	NA	NA	1.09151	6.78144	0.000309355	0.0250406
1585	TR568579|c2_g1_i1	---NA---					NA	NA	NA	NA	3.43862	-0.473469	8.68663e-05	0.0132628
1586	TR568727|c0_g1_i3	---NA---					NA	NA	NA	NA	-1.50709	6.0027	0.000672916	0.0364782
1587	TR568768|c1_g1_i1	---NA---					NA	NA	NA	NA	1.61035	3.20622	0.00102588	0.0452381
1588	TR568800|c1_g10_i1	---NA---					NA	NA	NA	NA	2.76873	0.0428108	0.00036766	0.0271218
1589	TR568808|c0_g1_i3	Multiple epidermal growth factor-like domains 10		GO:0006796,GO:0016740	phosphate-containing compound metabolic process,transferase activity	Biological Process,Molecular Function	NA	NA	NA	NA	6.84564	-1.02973	0.000863531	0.0418981
1590	TR568814|c0_g1_i1	---NA---					NA	NA	NA	NA	-2.49757	1.80119	0.000513908	0.0321767
1591	TR568895|c1_g6_i1	zinc metallo ase-disintegrin batroxstatin-3-like					NA	NA	NA	NA	1.47881	5.37353	4.78506e-05	0.00983135
1593	TR568924|c4_g3_i10	---NA---					NA	NA	NA	NA	2.17272	2.08373	0.000156517	0.0183954
1594	TR568924|c4_g3_i4	---NA---					NA	NA	NA	NA	5.87495	0.728437	0.000124141	0.0158088
1595	TR568969|c1_g1_i6	neurogenic locus notch homolog 1-like isoform X1					NA	NA	NA	NA	4.35556	-0.378137	0.000850389	0.0415892
1596	TR568993|c1_g1_i1	sodium- and chloride-dependent GABA transporter 2-like isoform X2		GO:0005328,GO:0006836,GO:0016021,GO:0055085	neurotransmitter:sodium symporter activity,neurotransmitter transport,integral component of membrane,transmembrane transport	Molecular Function,Biological Process,Cellular Component,Biological Process	NA	NA	NA	NA	6.89113	-0.212962	3.81991e-06	0.0031261
1597	TR569082|c3_g3_i7	ATP synthase subunit mitochondrial-like	EC:3.6.1,EC:3.6.1.3,EC:3.6.1.15	GO:0005524,GO:0005634,GO:0006334,GO:0015986,GO:0015991,GO:0045261,GO:0046933,GO:0046961	ATP binding,nucleus,nucleosome assembly,ATP synthesis coupled proton transport,ATP hydrolysis coupled proton transport,proton-transporting ATP synthase complex catalytic core F(1),proton-transporting ATP synthase activity rotational mechanism,proton-transporting ATPase activity rotational mechanism	Molecular Function,Cellular Component,Biological Process,Biological Process,Biological Process,Cellular Component,Molecular Function,Molecular Function	NA	NA	NA	NA	-9.99839	5.78967	0.000462684	0.0305316
1598	TR569182|c0_g1_i2	myosin heavy chain isoform A	EC:3.6.1,EC:3.6.1.15	GO:0003774,GO:0003779,GO:0005524,GO:0016459	motor activity,actin binding,ATP binding,myosin complex	Molecular Function,Molecular Function,Molecular Function,Cellular Component	NA	NA	NA	NA	5.28659	0.721346	2.17906e-05	0.00686824
1599	TR569238|c3_g4_i1	---NA---					NA	NA	NA	NA	2.08107	3.74482	0.000862305	0.0418981
1600	TR569308|c1_g1_i2	PREDICTED: uncharacterized protein C1orf228 homolog		GO:0005634,GO:0005737	nucleus,cytoplasm	Cellular Component,Cellular Component	NA	NA	NA	NA	8.23117	-0.0980984	0.000199869	0.0203181
1601	TR569332|c4_g1_i2	Sodium glucose cotransporter 4		GO:0006810,GO:0016020	transport,membrane	Biological Process,Cellular Component	NA	NA	NA	NA	2.67059	0.251892	0.000447066	0.0300249
1602	TR569347|c2_g1_i2	---NA---					NA	NA	NA	NA	2.8873	-0.295088	0.000797174	0.040105
1603	TR569414|c2_g1_i2	---NA---					NA	NA	NA	NA	-1.85927	3.18634	0.000710032	0.0376082
1604	TR569414|c2_g1_i3	---NA---					NA	NA	NA	NA	-1.83448	5.50683	0.000137736	0.0169293
1605	TR569414|c2_g4_i2	---NA---					NA	NA	NA	NA	-2.8946	0.180232	0.000791199	0.0399251
1606	TR569424|c1_g5_i1	Homeobox Nkx-		GO:0003677,GO:0030154,GO:0031018	DNA binding,cell differentiation,endocrine pancreas development	Molecular Function,Biological Process,Biological Process	NA	NA	NA	NA	1.99944	0.340756	0.00098257	0.0443628
1607	TR569466|c1_g3_i3	carboxymethylenebutenolidase homolog		GO:0006810	transport	Biological Process	NA	NA	NA	NA	1.77757	5.16215	3.33511e-06	0.00292124
1608	TR569478|c0_g5_i3	---NA---					NA	NA	NA	NA	2.63536	0.557911	0.00114371	0.0471262
1609	TR569723|c2_g2_i1	---NA---					NA	NA	NA	NA	2.24528	3.93635	0.000153548	0.0180975
1610	TR569738|c0_g4_i1	---NA---					NA	NA	NA	NA	3.34397	-0.275088	0.000537356	0.0329021
1612	TR569983|c1_g3_i1	---NA---					NA	NA	NA	NA	-1.25729	6.6429	0.000995455	0.0446538
1613	TR570025|c0_g6_i1	7B2 precursor		GO:0007218,GO:0030141	neuropeptide signaling pathway,secretory granule	Biological Process,Cellular Component	NA	NA	NA	NA	2.5253	4.56787	2.93179e-07	0.00097583
1615	TR570049|c0_g1_i1	monocarboxylate transporter 13-like isoform X1					NA	NA	NA	NA	1.77477	0.679366	0.000247778	0.0223488
1616	TR570052|c1_g3_i1	---NA---					NA	NA	NA	NA	-2.03234	1.7227	0.000894369	0.0426486
1617	TR570052|c2_g1_i1	---NA---					NA	NA	NA	NA	6.3375	-1.10609	0.00095606	0.0439861
1619	TR570065|c0_g7_i1	---NA---					NA	NA	NA	NA	-1.77897	4.22835	0.00093628	0.0436195
1620	TR570086|c8_g1_i1	---NA---					NA	NA	NA	NA	-2.83629	0.128378	0.000421965	0.0292622
1621	TR570117|c2_g3_i1	---NA---					NA	NA	NA	NA	-1.71117	2.83392	0.00059918	0.0346238
1622	TR570287|c4_g1_i1	hemicentin-1					NA	NA	NA	NA	4.19437	3.57315	2.30234e-06	0.00258892
1623	TR570287|c4_g1_i6	---NA---					NA	NA	NA	NA	2.93016	1.70998	1.70505e-05	0.00616091
1624	TR570397|c1_g4_i2	otoferlin-like isoform X3		GO:0016021	integral component of membrane	Cellular Component	NA	NA	NA	NA	5.2424	-0.174882	2.61484e-05	0.00747711
1625	TR570415|c2_g1_i1	---NA---					NA	NA	NA	NA	-1.44467	4.14156	0.000560402	0.0334811
1626	TR570432|c2_g1_i1	extensin-like isoform X1					NA	NA	NA	NA	4.27585	4.65863	4.04702e-05	0.00898017
1627	TR570575|c2_g1_i4	synaptotagmin-10-like isoform X2		GO:0005509,GO:0005544,GO:0005886,GO:0006906,GO:0007340,GO:0016021,GO:0017158,GO:0019905,GO:0030276,GO:0048791,GO:0070382	calcium ion binding,calcium-dependent phospholipid binding,plasma membrane,vesicle fusion,acrosome reaction,integral component of membrane,regulation of calcium ion-dependent exocytosis,syntaxin binding,clathrin binding,calcium ion-regulated exocytosis of neurotransmitter,exocytic vesicle	Molecular Function,Molecular Function,Cellular Component,Biological Process,Biological Process,Cellular Component,Biological Process,Molecular Function,Molecular Function,Biological Process,Cellular Component	NA	NA	NA	NA	7.24902	-0.606532	5.23849e-05	0.0102807
1628	TR570576|c1_g1_i1	---NA---					NA	NA	NA	NA	2.28285	0.68489	0.00120846	0.0483396
1629	TR570576|c1_g4_i3	---NA---					NA	NA	NA	NA	2.14048	2.025	0.000567961	0.0337335
1630	TR570589|c0_g1_i2	---NA---					NA	NA	NA	NA	-1.87667	5.3134	1.51135e-05	0.00574249
1631	TR570592|c0_g1_i2	cytoplasmic intermediate filament A		GO:0005198,GO:0005882	structural molecule activity,intermediate filament	Molecular Function,Cellular Component	NA	NA	NA	NA	2.25699	1.66653	1.89333e-05	0.00645678
1632	TR570592|c0_g3_i1	cytoplasmic intermediate filament A		GO:0005198,GO:0005737,GO:0005882	structural molecule activity,cytoplasm,intermediate filament	Molecular Function,Cellular Component,Cellular Component	NA	NA	NA	NA	3.49277	-0.443643	0.000646432	0.0358915
1634	TR570638|c4_g1_i1	---NA---					NA	NA	NA	NA	4.70554	1.93096	0.000362709	0.026953
1635	TR570638|c4_g3_i4	---NA---					NA	NA	NA	NA	4.25513	1.30255	0.00114237	0.0471262
1636	TR570638|c4_g4_i1	---NA---					NA	NA	NA	NA	4.23741	2.24712	3.12416e-05	0.00797437
1637	TR570638|c4_g4_i3	---NA---					NA	NA	NA	NA	4.78596	4.10502	4.35661e-05	0.00931218
1638	TR570638|c4_g4_i6	---NA---					NA	NA	NA	NA	4.84357	2.26183	2.51943e-06	0.00272266
1639	TR570638|c4_g4_i7	---NA---					NA	NA	NA	NA	2.70365	2.43495	1.35321e-05	0.00548081
1640	TR570638|c4_g5_i2	---NA---					NA	NA	NA	NA	3.21563	-0.734011	0.000680816	0.0368344
1641	TR570643|c1_g1_i7	---NA---					NA	NA	NA	NA	-1.66907	2.34612	0.000802296	0.0402896
1642	TR570654|c5_g1_i32	---NA---					NA	NA	NA	NA	8.45976	0.406568	0.000415431	0.0289276
1643	TR570698|c0_g2_i2	troponin I		GO:0005861	troponin complex	Cellular Component	NA	NA	NA	NA	8.19617	-0.176623	0.000502898	0.0318226
1644	TR570698|c1_g1_i1	troponin I		GO:0003779,GO:0005861,GO:0046872	actin binding,troponin complex,metal ion binding	Molecular Function,Cellular Component,Molecular Function	NA	NA	NA	NA	5.13086	3.52264	0.000113289	0.0151063
1645	TR570698|c1_g1_i3	troponin I		GO:0003779,GO:0005861,GO:0046872	actin binding,troponin complex,metal ion binding	Molecular Function,Cellular Component,Molecular Function	NA	NA	NA	NA	4.09896	1.02309	5.88974e-06	0.00382884
1646	TR571100|c4_g2_i1	---NA---					NA	NA	NA	NA	3.52622	6.78948	6.5615e-05	0.0116416
1648	TR571168|c2_g2_i2	kinase 4-like					NA	NA	NA	NA	-3.14703	-0.0376417	0.000312206	0.0251734
1649	TR571299|c3_g5_i2	prohormone-4-like isoform X1					NA	NA	NA	NA	1.39564	4.80895	1.09344e-05	0.00507881
1650	TR571310|c0_g1_i8	PREDICTED: uncharacterized protein LOC101855988 isoform X1					NA	NA	NA	NA	2.20795	1.68781	5.75298e-05	0.0107818
1652	TR571327|c0_g3_i1	---NA---					NA	NA	NA	NA	2.09491	4.6788	0.000936753	0.0436195
1653	TR571327|c0_g4_i1	PREDICTED: calmodulin-like					NA	NA	NA	NA	4.53001	1.53736	0.000394162	0.0281533
1654	TR571327|c0_g4_i2	---NA---					NA	NA	NA	NA	4.40033	4.03009	1.50266e-06	0.00211929
1655	TR571327|c0_g4_i3	PREDICTED: calmodulin-like					NA	NA	NA	NA	3.77541	2.83142	0.000456682	0.0303522
1656	TR571561|c7_g1_i2	---NA---					NA	NA	NA	NA	3.36557	-0.318745	0.000393697	0.0281442
1658	TR571577|c1_g1_i3	---NA---					NA	NA	NA	NA	6.62694	-0.773057	0.00128668	0.0497963
1659	TR571775|c0_g1_i1	---NA---					NA	NA	NA	NA	4.52074	-0.178262	1.89238e-05	0.00645678
1660	TR572206|c5_g2_i1	---NA---					NA	NA	NA	NA	-2.28411	0.431524	0.00018508	0.0197952
1661	TR572220|c0_g1_i1	Neurensin-1					NA	NA	NA	NA	1.74301	1.86121	0.000381067	0.0276693
1662	TR572489|c0_g1_i3	---NA---					NA	NA	NA	NA	-1.85334	0.214298	0.00119872	0.0481867
1663	TR572697|c0_g1_i3	PREDICTED: uncharacterized protein LOC101857196 isoform X1					NA	NA	NA	NA	5.82084	-0.796405	5.4536e-06	0.0036304
1664	TR572801|c1_g2_i1	---NA---					NA	NA	NA	NA	4.27354	-0.238524	0.000276478	0.0235717
1665	TR572801|c1_g2_i2	---NA---					NA	NA	NA	NA	3.82284	1.40071	0.000312979	0.0251961
1666	TR572853|c1_g4_i6	PREDICTED: uncharacterized protein LOC105348974					NA	NA	NA	NA	5.07209	0.765407	3.74616e-05	0.00863496
1667	TR572871|c4_g2_i3	---NA---					NA	NA	NA	NA	-3.21478	1.96309	0.000371821	0.0272356
1669	TR572937|c1_g2_i3	PRQFV-amide precursor					NA	NA	NA	NA	3.34115	1.82156	0.000177815	0.0194335
1670	TR573041|c0_g1_i1	---NA---					NA	NA	NA	NA	-2.13106	5.95061	0.000611832	0.0349973
1671	TR573101|c0_g1_i4	---NA---					NA	NA	NA	NA	6.29993	-0.649101	5.01778e-06	0.00347945
1672	TR573170|c1_g1_i3	major egg antigen-like isoform X2					NA	NA	NA	NA	4.82739	0.120594	0.000211298	0.0207739
1673	TR573273|c2_g2_i2	probable tubulin polyglutamylase TTLL9-like		GO:0006464	cellular protein modification process	Biological Process	NA	NA	NA	NA	4.64332	-0.228803	0.000145837	0.0175326
1674	TR573279|c0_g1_i1	---NA---					NA	NA	NA	NA	-2.52808	1.62691	0.000523326	0.0324422
1676	TR573321|c4_g1_i3	sodium- and chloride-dependent transporter XTRP3A-like					NA	NA	NA	NA	1.93935	3.06278	0.000100671	0.0141264
1677	TR573324|c3_g2_i8	mediator of RNA polymerase II transcription subunit 25-like					NA	NA	NA	NA	6.81464	-1.03046	0.000103648	0.0142913
1678	TR573332|c2_g5_i5	---NA---					NA	NA	NA	NA	-7.31632	0.103127	0.000219898	0.0212027
1679	TR573611|c1_g1_i2	---NA---					NA	NA	NA	NA	2.72345	1.681	9.95102e-05	0.0140896
1680	TR573700|c0_g4_i1	---NA---					NA	NA	NA	NA	-2.0966	0.369522	0.00121788	0.0485118
1683	TR573719|c1_g2_i6	---NA---					NA	NA	NA	NA	2.46585	0.254672	0.00119636	0.0481386
1684	TR573999|c1_g1_i1	hypothetical protein LOTGIDRAFT_162235					NA	NA	NA	NA	6.70694	-1.35559	2.87848e-05	0.0077954
1685	TR574009|c1_g7_i1	---NA---					NA	NA	NA	NA	-3.75681	0.00580841	0.000686228	0.036959
1686	TR574023|c1_g1_i1	---NA---					NA	NA	NA	NA	-1.96154	1.19879	0.000663115	0.0361352
1687	TR574045|c1_g7_i1	---NA---					NA	NA	NA	NA	-4.22462	-0.127971	0.00010147	0.0141906
1688	TR574056|c5_g2_i8	PREDICTED: uncharacterized protein C15orf61-like		GO:0016020	membrane	Cellular Component	NA	NA	NA	NA	6.96185	-0.0595044	2.35437e-06	0.00261213
1689	TR574102|c1_g2_i1	---NA---					NA	NA	NA	NA	-2.3015	1.02269	0.000307737	0.0250024
1690	TR574116|c1_g1_i1	Tyrosine aminotransferase	EC:2.6.1.5	GO:0004838,GO:0009058,GO:0009074,GO:0030170,GO:0043648,GO:1901605	L-tyrosine:2-oxoglutarate aminotransferase activity,biosynthetic process,aromatic amino acid family catabolic process,pyridoxal phosphate binding,dicarboxylic acid metabolic process,alpha-amino acid metabolic process	Molecular Function,Biological Process,Biological Process,Molecular Function,Biological Process,Biological Process	NA	NA	NA	NA	1.49096	2.55595	0.00035898	0.0268384
1691	TR574121|c2_g1_i8	meiotically up-regulated gene 158 -like					NA	NA	NA	NA	2.58357	3.71551	0.00103526	0.0453978
1692	TR574197|c0_g1_i1	integrin beta-PS-like					NA	NA	NA	NA	8.31771	-0.261407	0.000824794	0.0408145
1693	TR574197|c0_g1_i2	integrin beta-PS-like					NA	NA	NA	NA	2.67395	3.51127	5.30448e-05	0.010337
1694	TR574251|c1_g1_i3	cytoplasmic intermediate filament A					NA	NA	NA	NA	1.72991	2.01218	0.000592328	0.0344419
1696	TR574313|c2_g1_i2	---NA---					NA	NA	NA	NA	2.01142	3.93727	0.000127527	0.0160789
1697	TR574317|c2_g1_i1	PREDICTED: uncharacterized protein LOC101857899					NA	NA	NA	NA	3.21503	0.751	7.5949e-05	0.0123648
1698	TR574326|c2_g3_i4	---NA---					NA	NA	NA	NA	2.98683	2.15947	0.000353756	0.0266393
1699	TR574326|c2_g3_i5	---NA---					NA	NA	NA	NA	3.35378	2.4831	0.000603139	0.0347321
1700	TR574326|c2_g3_i7	---NA---					NA	NA	NA	NA	4.38949	-0.288526	0.000190255	0.0201444
1701	TR574556|c3_g1_i1	---NA---					NA	NA	NA	NA	2.87458	-0.284526	0.000684154	0.0369145
1702	TR574770|c6_g1_i13	MOSC domain-containing mitochondrial		GO:0005488,GO:0005743,GO:0016491	binding,mitochondrial inner membrane,oxidoreductase activity	Molecular Function,Cellular Component,Molecular Function	NA	NA	NA	NA	-7.6382	-0.184198	0.000601611	0.0346799
1703	TR574945|c0_g1_i1	PREDICTED: uncharacterized protein LOC101860237 isoform X1					NA	NA	NA	NA	5.96373	-0.644402	1.97015e-07	0.000745172
1704	TR575031|c1_g2_i3	cGMP-dependent isozyme 1	EC:2.7.11,EC:2.7.11.12	GO:0004692,GO:0005524,GO:0006468,GO:0030553	cGMP-dependent protein kinase activity,ATP binding,protein phosphorylation,cGMP binding	Molecular Function,Molecular Function,Biological Process,Molecular Function	NA	NA	NA	NA	-6.91297	-0.261272	9.64128e-06	0.00477536
1705	TR575038|c0_g11_i1	PREDICTED: uncharacterized protein LOC101860016 isoform X2					NA	NA	NA	NA	2.79685	0.431118	1.27953e-05	0.0053503
1706	TR575064|c1_g3_i7	EF-hand calcium-binding domain-containing 5-like					NA	NA	NA	NA	5.57002	0.981816	2.35284e-05	0.00716903
1707	TR575069|c0_g2_i1	SHQ1 homolog					NA	NA	NA	NA	-7.02171	-0.0808017	0.000163496	0.0187224
1708	TR575115|c2_g1_i3	---NA---					NA	NA	NA	NA	4.3507	-0.209752	0.000350174	0.0265834
1709	TR575115|c2_g2_i2	---NA---					NA	NA	NA	NA	2.91091	0.860423	4.58703e-06	0.00335474
1710	TR575147|c0_g1_i3	---NA---					NA	NA	NA	NA	1.95719	1.33276	0.000247489	0.0223488
1711	TR575255|c3_g2_i1	---NA---					NA	NA	NA	NA	-2.91922	0.147664	0.00068782	0.0369969
1712	TR575702|c1_g2_i2	---NA---					NA	NA	NA	NA	2.10639	0.686364	0.000702369	0.0373725
1715	TR575717|c0_g1_i4	polycystic kidney disease 1-like 3-like isoform X1					NA	NA	NA	NA	2.34797	0.551839	0.000535786	0.0328301
1716	TR575722|c2_g5_i2	---NA---					NA	NA	NA	NA	-3.02843	0.667566	2.38765e-05	0.0071895
1717	TR575756|c1_g2_i2	---NA---					NA	NA	NA	NA	-4.26257	0.340673	1.71003e-06	0.00218913
1718	TR575776|c0_g3_i3	pre-B-cell leukemia transcription factor 1-like					NA	NA	NA	NA	6.98848	-0.298693	7.87936e-06	0.00437099
1719	TR575779|c0_g2_i1	Hypothetical Schistosoma UPF0506					NA	NA	NA	NA	5.74687	-0.136675	1.07076e-05	0.00506246
1720	TR575783|c1_g3_i3	---NA---					NA	NA	NA	NA	-1.62157	10.0362	0.000201444	0.0203181
1721	TR575789|c4_g1_i2	anosmin- partial					NA	NA	NA	NA	5.62025	0.287191	2.65076e-06	0.00275716
1722	TR575815|c2_g3_i8	Zinc finger C3H1 domain-containing					NA	NA	NA	NA	7.90304	-0.194233	4.28242e-05	0.00931218
1723	TR575848|c2_g6_i2	---NA---					NA	NA	NA	NA	1.85533	1.78402	0.000549911	0.0331345
1724	TR575851|c1_g3_i1	---NA---					NA	NA	NA	NA	3.59607	5.3072	8.7549e-06	0.00461079
1725	TR575865|c0_g5_i4	---NA---					NA	NA	NA	NA	-2.79254	0.0264459	0.00111937	0.0468146
1726	TR575865|c0_g5_i6	polycystic kidney disease 2-like 1 isoform X1		GO:0016020	membrane	Cellular Component	NA	NA	NA	NA	-1.72319	3.64232	0.000339921	0.0262873
1728	TR575910|c1_g4_i6	myosin essential light chain					NA	NA	NA	NA	4.3004	2.09685	4.91586e-05	0.00986192
1729	TR575946|c2_g1_i2	JC7958galaxin precursor - reef coral					NA	NA	NA	NA	3.39527	0.491961	3.66068e-05	0.00859293
1730	TR575959|c2_g2_i2	thioredoxin domain-containing 12					NA	NA	NA	NA	-1.45748	8.80513	0.0009645	0.0440973
1731	TR575992|c0_g3_i2	HRAS-like suppressor 2					NA	NA	NA	NA	-1.90996	4.89372	0.000477406	0.0310678
1732	TR576062|c4_g3_i1	beta-thymosin domain repeat CSP29KDa_v1		GO:0003785,GO:0007015	actin monomer binding,actin filament organization	Molecular Function,Biological Process	NA	NA	NA	NA	2.20263	0.259429	0.000715539	0.0377796
1733	TR576071|c1_g1_i1	---NA---					NA	NA	NA	NA	-2.18022	1.45705	0.000182015	0.0195933
1734	TR576071|c1_g2_i1	---NA---					NA	NA	NA	NA	-2.52911	-0.31255	0.00068238	0.0368472
1735	TR576071|c1_g2_i2	---NA---					NA	NA	NA	NA	-1.88532	3.21434	0.000764043	0.0391965
1736	TR576088|c3_g1_i1	papilin-like isoform X2					NA	NA	NA	NA	2.9378	3.23485	2.80621e-05	0.00765599
1737	TR576088|c3_g2_i1	CADN_ACRMI ame: Full= partial					NA	NA	NA	NA	2.56253	2.01083	4.60133e-05	0.00969319
1738	TR576130|c2_g2_i3	chromatin modification-related eaf-1-like isoform X2					NA	NA	NA	NA	5.16079	1.44741	0.000201357	0.0203181
1739	TR576143|c2_g2_i1	peptidase family M13 containing	EC:3.4.24	GO:0004222,GO:0006508	metalloendopeptidase activity,proteolysis	Molecular Function,Biological Process	NA	NA	NA	NA	9.02065	1.34801	0.000140973	0.0172508
1740	TR576189|c2_g1_i2	---NA---					NA	NA	NA	NA	4.83967	-0.207206	0.000929168	0.0434544
1741	TR576191|c3_g4_i2	---NA---					NA	NA	NA	NA	5.58748	0.455023	6.93098e-06	0.00409031
1742	TR576194|c2_g3_i4	calcium channel beta subunit		GO:0005245,GO:0005891,GO:0070588	voltage-gated calcium channel activity,voltage-gated calcium channel complex,calcium ion transmembrane transport	Molecular Function,Cellular Component,Biological Process	NA	NA	NA	NA	1.40086	1.74991	0.000948968	0.0438936
1744	TR576288|c2_g1_i1	---NA---					NA	NA	NA	NA	-1.5492	3.93298	0.00010329	0.0142771
1745	TR576374|c3_g1_i1	---NA---					NA	NA	NA	NA	-1.54506	2.09093	0.00112704	0.0469234
1746	TR576499|c0_g2_i1	pedal peptide-1 precursor					NA	NA	NA	NA	3.76764	0.290983	9.30633e-05	0.0137205
1747	TR576632|c2_g5_i3	tetraspanin-1-like isoform X2					NA	NA	NA	NA	2.42224	0.672797	0.000225276	0.0213981
1748	TR576668|c3_g2_i1	SKI DACH domain-containing 1-like		GO:0016020	membrane	Cellular Component	NA	NA	NA	NA	2.50089	0.438713	6.4345e-05	0.0114651
1749	TR576691|c5_g1_i3	tubulin beta chain-like	EC:3.6.1,EC:3.6.1.15	GO:0003924,GO:0005200,GO:0005525,GO:0005737,GO:0005874,GO:0007017	GTPase activity,structural constituent of cytoskeleton,GTP binding,cytoplasm,microtubule,microtubule-based process	Molecular Function,Molecular Function,Molecular Function,Cellular Component,Cellular Component,Biological Process	NA	NA	NA	NA	1.65486	6.79892	0.000211457	0.0207739
1750	TR576821|c0_g1_i1	kelch 10					NA	NA	NA	NA	-1.53797	5.98038	0.00109072	0.0463096
1751	TR576821|c0_g1_i2	Kelch 10					NA	NA	NA	NA	-1.57174	5.47436	0.00117635	0.0478124
1753	TR576903|c0_g1_i3	f box only 32					NA	NA	NA	NA	1.90567	3.9786	0.000499121	0.0316598
1754	TR576913|c3_g5_i1	---NA---					NA	NA	NA	NA	1.69475	3.85775	0.000218975	0.0211599
1756	TR576925|c0_g1_i4	MAP kinase-interacting serine threonine- kinase 1 isoform X3	EC:2.7.11,EC:2.7.11.17	GO:0004683,GO:0005516,GO:0005524,GO:0005634,GO:0005737,GO:0009931,GO:0018105,GO:0035556,GO:0046777	calmodulin-dependent protein kinase activity,calmodulin binding,ATP binding,nucleus,cytoplasm,calcium-dependent protein serine/threonine kinase activity,peptidyl-serine phosphorylation,intracellular signal transduction,protein autophosphorylation	Molecular Function,Molecular Function,Molecular Function,Cellular Component,Cellular Component,Molecular Function,Biological Process,Biological Process,Biological Process	NA	NA	NA	NA	1.83126	3.23666	2.90451e-05	0.00779636
1757	TR577169|c0_g1_i2	---NA---					NA	NA	NA	NA	3.42835	0.357593	3.31289e-06	0.00292124
1758	TR577169|c0_g2_i6	whitnin precursor					NA	NA	NA	NA	1.68732	2.39234	0.000122616	0.0157454
1759	TR577210|c0_g1_i1	---NA---					NA	NA	NA	NA	-1.7592	3.51532	0.000804557	0.0403103
1761	TR577249|c0_g1_i1	acidic ribosomal partial		GO:0005840,GO:0042254	ribosome,ribosome biogenesis	Cellular Component,Biological Process	NA	NA	NA	NA	-1.6676	8.94263	1.49368e-06	0.00211929
1762	TR577252|c0_g1_i2	---NA---					NA	NA	NA	NA	5.15569	-0.691384	0.000573828	0.0339126
1763	TR577335|c0_g2_i1	---NA---					NA	NA	NA	NA	-1.60411	6.44995	0.000938409	0.0436478
1764	TR577335|c0_g2_i4	---NA---					NA	NA	NA	NA	-1.98498	6.97494	0.000174889	0.0193173
1766	TR577383|c0_g1_i7	DD3-3- partial					NA	NA	NA	NA	5.5031	2.05134	2.59104e-05	0.0074346
1768	TR577433|c3_g1_i8	charged multivesicular body 7-like		GO:0006810,GO:0044424	transport,intracellular part	Biological Process,Cellular Component	NA	NA	NA	NA	7.52958	0.40258	1.34256e-05	0.00547628
1769	TR577442|c2_g1_i1	PREDICTED: uncharacterized protein LOC101854199		GO:0016020	membrane	Cellular Component	NA	NA	NA	NA	1.69481	2.65297	1.94398e-05	0.00647266
1770	TR577592|c2_g3_i1	---NA---					NA	NA	NA	NA	-1.50516	8.38091	0.000544606	0.0331024
1771	TR577623|c2_g1_i1	lisH domain-containing ARMC9		GO:0005515,GO:0070062	protein binding,extracellular exosome	Molecular Function,Cellular Component	NA	NA	NA	NA	7.4649	-0.486053	0.00109804	0.0464384
1773	TR577875|c4_g1_i1	---NA---					NA	NA	NA	NA	-1.61036	2.04752	0.00110085	0.0464751
1775	TR578069|c2_g1_i1	thiopurine S-methyltransferase isoform X1		GO:0008152,GO:0008757	metabolic process,S-adenosylmethionine-dependent methyltransferase activity	Biological Process,Molecular Function	NA	NA	NA	NA	2.35887	0.466165	6.89971e-05	0.0118134
1776	TR578140|c1_g2_i1	---NA---					NA	NA	NA	NA	-2.65625	-0.412688	0.000769749	0.0393437
1777	TR578195|c2_g2_i5	src family kinase	EC:2.7.10	GO:0004713,GO:0005524,GO:0018108,GO:0044763,GO:0046872,GO:0050794,GO:0050896	protein tyrosine kinase activity,ATP binding,peptidyl-tyrosine phosphorylation,single-organism cellular process,metal ion binding,regulation of cellular process,response to stimulus	Molecular Function,Molecular Function,Biological Process,Biological Process,Molecular Function,Biological Process,Biological Process	NA	NA	NA	NA	1.49229	2.05605	0.000594639	0.0344572
1778	TR578228|c3_g2_i2	cell number regulator 10-like		GO:0016021	integral component of membrane	Cellular Component	NA	NA	NA	NA	2.7941	0.440107	0.000610814	0.0349973
1779	TR578272|c4_g2_i1	suppressor of cytokine signaling 2-like		GO:0050794	regulation of cellular process	Biological Process	NA	NA	NA	NA	2.01422	1.40596	0.000541542	0.0330368
1781	TR578766|c3_g1_i1	tubulin alpha chain-like	EC:3.6.1,EC:3.6.1.15	GO:0003924,GO:0005200,GO:0005525,GO:0005874,GO:0007017	GTPase activity,structural constituent of cytoskeleton,GTP binding,microtubule,microtubule-based process	Molecular Function,Molecular Function,Molecular Function,Cellular Component,Biological Process	NA	NA	NA	NA	3.17374	0.553989	1.92191e-05	0.00647266
1782	TR578833|c0_g5_i8	ras-related Rab-7a	EC:3.6.1,EC:3.6.1.15	GO:0000421,GO:0003924,GO:0005525,GO:0005794,GO:0005811,GO:0005829,GO:0006622,GO:0007174,GO:0007264,GO:0008333,GO:0019003,GO:0019076,GO:0022615,GO:0030670,GO:0030904,GO:0031902,GO:0032419,GO:0033162,GO:0034045,GO:0042147,GO:0045022,GO:0045732,GO:0048524,GO:0061724,GO:0070062,GO:0090383,GO:0090385,GO:1903543,GO:2000785	autophagosome membrane,GTPase activity,GTP binding,Golgi apparatus,lipid particle,cytosol,protein targeting to lysosome,epidermal growth factor catabolic process,small GTPase mediated signal transduction,endosome to lysosome transport,GDP binding,viral release from host cell,protein to membrane docking,phagocytic vesicle membrane,retromer complex,late endosome membrane,extrinsic component of lyso…	Cellular Component,Molecular Function,Molecular Function,Cellular Component,Cellular Component,Cellular Component,Biological Process,Biological Process,Biological Process,Biological Process,Molecular Function,Biological Process,Biological Process,Cellular Component,Cellular Component,Cellular Component,Cellular Component,Cellular Component,Cellular Component,Biological Process,Biological Process,…	NA	NA	NA	NA	1.63387	4.41092	2.09736e-05	0.00676448
1783	TR578889|c0_g2_i2	sodium- and chloride-dependent glycine transporter 1-like		GO:0005328,GO:0006836,GO:0016021,GO:0055085	neurotransmitter:sodium symporter activity,neurotransmitter transport,integral component of membrane,transmembrane transport	Molecular Function,Biological Process,Cellular Component,Biological Process	NA	NA	NA	NA	1.82562	1.98303	0.000161176	0.0185591
1784	TR578956|c5_g2_i2	E3 ubiquitin- ligase TRIM71-like					NA	NA	NA	NA	4.98141	1.34885	0.000104238	0.0143132
1785	TR578962|c3_g2_i10	---NA---					NA	NA	NA	NA	-8.92696	1.22452	3.69046e-05	0.00859293
1786	TR578970|c3_g4_i6	limbic system-associated membrane -like					NA	NA	NA	NA	8.01746	0.589492	0.000235716	0.0217935
1787	TR579063|c1_g3_i2	thioredoxin domain-containing 12-like isoform X2					NA	NA	NA	NA	-2.22229	6.23047	9.88686e-06	0.00484386
1789	TR579083|c1_g1_i8	---NA---					NA	NA	NA	NA	-2.90267	3.25229	0.000569265	0.0337868
1790	TR579220|c1_g1_i3	---NA---					NA	NA	NA	NA	2.61553	1.40287	1.37638e-05	0.00550004
1791	TR579320|c0_g2_i1	fructose-bisphosphate aldolase-like	EC:4.1.2.13	GO:0004332,GO:0006096	fructose-bisphosphate aldolase activity,glycolytic process	Molecular Function,Biological Process	NA	NA	NA	NA	1.04027	7.1292	0.00111088	0.0466662
1792	TR579351|c2_g2_i3	Major facilitator superfamily domain-containing 6					NA	NA	NA	NA	6.87696	-0.861418	5.6321e-07	0.00114306
1793	TR579405|c2_g2_i1	---NA---					NA	NA	NA	NA	-2.15165	1.6881	0.000630156	0.0355016
1794	TR579572|c0_g1_i1	solute carrier family 23 member 1-like		GO:0006810,GO:0016020	transport,membrane	Biological Process,Cellular Component	NA	NA	NA	NA	3.10859	-0.903954	0.000424127	0.029369
1795	TR579575|c5_g1_i5	PREDICTED: uncharacterized protein LOC101848577					NA	NA	NA	NA	3.95506	0.726081	0.000144884	0.0175326
1796	TR579580|c0_g1_i4	---NA---					NA	NA	NA	NA	-3.14576	-0.167669	0.000399623	0.0283729
1797	TR579709|c1_g3_i3	---NA---					NA	NA	NA	NA	2.11802	1.78027	0.000561082	0.0334811
1798	TR579744|c1_g2_i1	---NA---					NA	NA	NA	NA	-3.71019	0.246142	3.89346e-05	0.00876794
1799	TR579959|c1_g1_i1	ankyrin repeat domain-containing 17-like isoform X1					NA	NA	NA	NA	4.88895	0.14059	0.000854142	0.0416612
1800	TR580024|c1_g2_i3	hephaestin isoform X2					NA	NA	NA	NA	2.00906	0.669831	0.000772386	0.0393817
1801	TR580026|c2_g4_i4	hypothetical protein LOTGIDRAFT_235099					NA	NA	NA	NA	2.28046	1.84227	4.67275e-05	0.00972061
1802	TR580028|c0_g3_i14	PREDICTED: uncharacterized protein LOC101852657 isoform X1					NA	NA	NA	NA	5.48449	-0.498488	5.53657e-06	0.00364937
1803	TR580028|c0_g3_i18	---NA---					NA	NA	NA	NA	4.47639	2.05893	0.000176537	0.0193924
1804	TR580028|c0_g3_i20	PREDICTED: uncharacterized protein LOC101852657 isoform X3					NA	NA	NA	NA	5.59168	2.15164	0.000835642	0.0411935
1805	TR580028|c0_g3_i4	---NA---					NA	NA	NA	NA	1.71334	5.89169	0.000588258	0.0344083
1806	TR580040|c2_g9_i6	transmembrane GTPase Marf		GO:0005739,GO:0016020	mitochondrion,membrane	Cellular Component,Cellular Component	NA	NA	NA	NA	5.01292	0.231827	0.000196687	0.0202652
1808	TR580161|c1_g1_i3	sulfate transporter-like isoform X3		GO:0008272,GO:0015116,GO:0016020,GO:0055085	sulfate transport,sulfate transmembrane transporter activity,membrane,transmembrane transport	Biological Process,Molecular Function,Cellular Component,Biological Process	NA	NA	NA	NA	8.01055	-1.05692	0.00113567	0.0471262
1809	TR580164|c2_g1_i3	PREDICTED: myosin-15-like					NA	NA	NA	NA	6.40249	1.86531	2.93089e-06	0.00287947
1810	TR580171|c1_g1_i14	---NA---		GO:0016787	hydrolase activity	Molecular Function	NA	NA	NA	NA	3.0181	1.48618	0.000762239	0.0391523
1811	TR580175|c1_g2_i1	PREDICTED: uncharacterized protein LOC101852804					NA	NA	NA	NA	1.56409	1.6285	0.000877707	0.0421676
1812	TR580205|c3_g2_i7	villin-1-like isoform X3		GO:0016043,GO:0044763	cellular component organization,single-organism cellular process	Biological Process,Biological Process	NA	NA	NA	NA	2.41482	0.832073	0.000340255	0.0262887
1813	TR580211|c2_g2_i1	PREDICTED: uncharacterized protein LOC101861042 isoform X3					NA	NA	NA	NA	-9.03589	0.909396	1.11135e-05	0.00507881
1814	TR580228|c1_g3_i1	---NA---					NA	NA	NA	NA	-1.77367	2.76087	0.00058584	0.0344025
1815	TR580234|c1_g2_i2	zinc finger 271-like					NA	NA	NA	NA	4.41245	0.45118	0.000226519	0.021468
1816	TR580242|c1_g1_i1	---NA---					NA	NA	NA	NA	-2.18133	0.159044	0.000826543	0.040866
1817	TR580380|c3_g1_i1	PREDICTED: uncharacterized protein LOC101849567					NA	NA	NA	NA	2.87786	-0.372287	0.000486259	0.0313174
1818	TR580503|c3_g1_i1	sodium- and chloride-dependent neutral and basic amino acid transporter B(0+)- partial		GO:0006810,GO:0015293,GO:0016020	transport,symporter activity,membrane	Biological Process,Molecular Function,Cellular Component	NA	NA	NA	NA	2.51991	-0.674454	0.000425047	0.0293759
1819	TR580550|c3_g1_i1	hypothetical protein CAPTEDRAFT_201069					NA	NA	NA	NA	2.10178	2.57797	0.0012871	0.0497963
1820	TR580550|c3_g1_i4	hypothetical protein CAPTEDRAFT_201069					NA	NA	NA	NA	2.09507	2.56078	0.000585624	0.0344025
1821	TR580748|c4_g3_i4	PREDICTED: SCO-spondin-like					NA	NA	NA	NA	1.62227	8.98528	0.000160569	0.0185571
1822	TR580781|c2_g1_i3	---NA---					NA	NA	NA	NA	-2.01624	1.10103	0.000954033	0.0439568
1823	TR580793|c0_g1_i1	cyclin-dependent kinase 12-like isoform X2					NA	NA	NA	NA	2.94867	0.845162	0.000322556	0.0254893
1825	TR580882|c2_g1_i1	---NA---					NA	NA	NA	NA	2.58376	1.59425	0.000494963	0.0315605
1826	TR580882|c2_g1_i3	---NA---					NA	NA	NA	NA	2.17011	3.20055	0.0010339	0.0453978
1827	TR580939|c3_g1_i2	Csa-calmodulin partial		GO:0005509	calcium ion binding	Molecular Function	NA	NA	NA	NA	1.17743	6.03215	1.84093e-05	0.00635626
1828	TR580946|c1_g2_i4	---NA---					NA	NA	NA	NA	-1.37326	3.49942	0.000607332	0.0349252
1829	TR580973|c0_g1_i1	---NA---					NA	NA	NA	NA	1.81526	0.508956	0.000884545	0.0423986
1830	TR581026|c0_g1_i1	glycine-rich cell wall structural 1-like					NA	NA	NA	NA	3.12227	2.18392	1.17396e-05	0.00515688
1831	TR581058|c2_g2_i2	---NA---					NA	NA	NA	NA	-1.45937	1.96378	0.00104242	0.0454304
1832	TR581079|c0_g2_i4	---NA---					NA	NA	NA	NA	-1.88889	2.65225	0.000611951	0.0349973
1833	TR581086|c1_g1_i4	SMG5-like isoform X2					NA	NA	NA	NA	6.28844	-1.02409	0.00083215	0.04107
1834	TR581162|c1_g1_i10	thioredoxin domain-containing 3 homolog		GO:0009209,GO:0009220,GO:0046132	pyrimidine ribonucleoside triphosphate biosynthetic process,pyrimidine ribonucleotide biosynthetic process,pyrimidine ribonucleoside biosynthetic process	Biological Process,Biological Process,Biological Process	NA	NA	NA	NA	9.46028	1.87477	0.0012471	0.0491518
1835	TR581326|c1_g1_i1	---NA---					NA	NA	NA	NA	3.08354	-0.446343	0.000928666	0.0434544
1836	TR581465|c3_g1_i2	---NA---					NA	NA	NA	NA	1.91238	0.622185	0.000455148	0.0303229
1837	TR581672|c4_g5_i3	max X		GO:0000122,GO:0000977,GO:0001227,GO:0005634,GO:0005737,GO:0008134,GO:0042803,GO:0046982	negative regulation of transcription from RNA polymerase II promoter,RNA polymerase II regulatory region sequence-specific DNA binding,transcriptional repressor activity RNA polymerase II transcription regulatory region sequence-specific binding,nucleus,cytoplasm,transcription factor binding,protein homodimerization activity,protein heterodimerization activity	Biological Process,Molecular Function,Molecular Function,Cellular Component,Cellular Component,Molecular Function,Molecular Function,Molecular Function	NA	NA	NA	NA	1.5238	1.88852	0.000872011	0.042096
1839	TR581683|c0_g2_i1	---NA---					NA	NA	NA	NA	3.41122	-0.833837	0.000507589	0.0319042
1840	TR581698|c1_g1_i3	zinc finger MYND domain-containing 12					NA	NA	NA	NA	-2.80304	1.55798	0.000124097	0.0158088
1841	TR581712|c2_g2_i1	---NA---					NA	NA	NA	NA	3.09652	0.119547	0.000191686	0.0201648
1842	TR581734|c7_g2_i1	---NA---					NA	NA	NA	NA	-1.1943	4.83075	0.00113495	0.0471262
1843	TR581912|c1_g2_i3	growth arrest and DNA damage-inducible GADD45 gamma-like					NA	NA	NA	NA	2.09925	1.77902	0.00094044	0.0436779
1844	TR581971|c1_g1_i3	Kinetochore Nuf2					NA	NA	NA	NA	-5.92791	-0.462193	0.000947294	0.0438936
1845	TR582151|c0_g1_i5	---NA---					NA	NA	NA	NA	3.94391	-0.711754	0.000687596	0.0369969
1846	TR582259|c4_g1_i1	---NA---					NA	NA	NA	NA	2.49187	0.25195	0.000794115	0.0399753
1848	TR582316|c0_g2_i1	---NA---					NA	NA	NA	NA	9.39042	1.28405	0.000191537	0.0201648
1850	TR582563|c5_g2_i3	collagen alpha type					NA	NA	NA	NA	10.5465	2.66648	0.000537803	0.0329052
1851	TR582581|c6_g5_i2	---NA---					NA	NA	NA	NA	1.96245	2.5851	0.000119718	0.0156117
1852	TR582625|c2_g1_i2	1,2-dihydroxy-3-keto-5-methylthiopentene dioxygenase		GO:0009086,GO:0044424,GO:0046872,GO:0051213	methionine biosynthetic process,intracellular part,metal ion binding,dioxygenase activity	Biological Process,Cellular Component,Molecular Function,Molecular Function	NA	NA	NA	NA	4.71459	1.67991	0.000785678	0.0398297
1853	TR582631|c3_g1_i1	PREDICTED: uncharacterized protein LOC101857196 isoform X2					NA	NA	NA	NA	2.67547	3.40308	8.56828e-05	0.0131545
1854	TR582631|c3_g6_i2	---NA---					NA	NA	NA	NA	3.21359	2.44618	0.000225198	0.0213981
1855	TR582633|c0_g3_i1	macrophage mannose receptor 1-like					NA	NA	NA	NA	1.99911	1.67543	0.000407391	0.028704
1856	TR582661|c0_g1_i1	---NA---					NA	NA	NA	NA	-1.55197	4.47304	0.000543263	0.0330501
1857	TR582665|c2_g1_i8	PREDICTED: mitochondrial GTPase 1-like					NA	NA	NA	NA	6.86068	0.812825	0.000232876	0.0216777
1859	TR582849|c0_g2_i1	AF322410_1calexcitin B					NA	NA	NA	NA	3.68841	2.38579	0.000644088	0.0358701
1860	TR582849|c0_g3_i1	AChain X-Ray Structure Of Calexcitin From Loligo Pealeii At		GO:0046872	metal ion binding	Molecular Function	NA	NA	NA	NA	4.14642	0.863337	5.01161e-06	0.00347945
1861	TR582849|c0_g5_i5	AF322410_1calexcitin B		GO:0046872	metal ion binding	Molecular Function	NA	NA	NA	NA	3.68426	1.57835	0.000442817	0.0298134
1862	TR582938|c2_g1_i3	la-related CG11505-like					NA	NA	NA	NA	4.48108	0.728353	0.000406211	0.0286879
1863	TR582981|c2_g2_i1	---NA---					NA	NA	NA	NA	-5.22107	0.830953	3.89595e-06	0.0031261
1864	TR583038|c1_g2_i1	PREDICTED: uncharacterized protein LOC101845136					NA	NA	NA	NA	1.45462	5.65888	0.000592888	0.0344419
1865	TR583411|c2_g1_i1	peptidase inhibitor partial					NA	NA	NA	NA	2.6796	3.95278	2.91401e-06	0.00287947
1866	TR583503|c1_g4_i2	Allene oxide synthase-lipoxygenase		GO:0051213	dioxygenase activity	Molecular Function	NA	NA	NA	NA	2.60445	0.184392	0.00111958	0.0468146
1867	TR583650|c2_g1_i4	---NA---					NA	NA	NA	NA	4.72068	-0.422115	0.000479639	0.0310678
1868	TR583667|c1_g1_i3	hypothetical protein LOTGIDRAFT_234386					NA	NA	NA	NA	1.85125	2.81453	0.000100443	0.0141182
1869	TR583722|c0_g1_i1	PREDICTED: uncharacterized protein LOC101857564					NA	NA	NA	NA	3.32503	0.919859	0.00115145	0.0473151
1870	TR583840|c0_g1_i4	---NA---					NA	NA	NA	NA	3.03689	-0.033602	0.000430946	0.0294655
1871	TR583911|c0_g1_i4	PREDICTED: uncharacterized protein LOC101861667					NA	NA	NA	NA	-6.76533	-0.549222	2.74838e-05	0.00765599
1872	TR584039|c2_g1_i5	---NA---					NA	NA	NA	NA	-7.34899	-0.2721	4.19584e-06	0.00323278
1873	TR584094|c6_g1_i1	---NA---					NA	NA	NA	NA	-1.23862	2.31265	0.00129431	0.049811
1874	TR584448|c2_g1_i4	ectonucleoside triphosphate diphosphohydrolase 2-like isoform X4					NA	NA	NA	NA	-6.26689	-0.661466	0.000332317	0.0258595
1875	TR584484|c0_g1_i2	Regulation of nuclear pre-mRNA domain-containing 2					NA	NA	NA	NA	-4.1297	-0.0113031	0.000491119	0.0314116
1876	TR584526|c0_g1_i1	---NA---					NA	NA	NA	NA	-2.72206	0.560584	0.000277258	0.0235899
1877	TR584535|c0_g1_i1	---NA---					NA	NA	NA	NA	2.39716	0.0211616	0.000542191	0.0330449
1878	TR584574|c2_g2_i1	---NA---					NA	NA	NA	NA	8.15956	-0.498697	5.25065e-06	0.00356013
1879	TR584656|c0_g3_i3	---NA---					NA	NA	NA	NA	3.24974	0.588341	0.000170409	0.0189557
1880	TR584703|c1_g1_i4	---NA---					NA	NA	NA	NA	-1.80466	2.05337	0.000855639	0.0417098
1881	TR584807|c1_g1_i1	---NA---					NA	NA	NA	NA	3.3982	1.13999	0.000438817	0.0297655
1882	TR584846|c0_g1_i1	carbohydrate sulfotransferase 11-like isoform X2					NA	NA	NA	NA	6.24277	-1.5481	0.000647318	0.0358915
1883	TR584880|c0_g2_i1	---NA---					NA	NA	NA	NA	2.39719	4.19147	0.000318067	0.0252896
1885	TR585023|c1_g2_i7	PREDICTED: four and a half LIM domains protein 2-like isoform X1					NA	NA	NA	NA	2.76665	-0.187989	0.00050713	0.0319042
1886	TR585049|c0_g2_i1	GLY- isoform a	EC:2.4.1,EC:2.4.1.41	GO:0004653,GO:0005488,GO:0005794,GO:0016020,GO:0018243	polypeptide N-acetylgalactosaminyltransferase activity,binding,Golgi apparatus,membrane,protein O-linked glycosylation via threonine	Molecular Function,Molecular Function,Cellular Component,Cellular Component,Biological Process	NA	NA	NA	NA	3.45236	-0.721946	0.0011077	0.0466332
1887	TR585113|c2_g1_i1	C-type lectin domain family 11 member A-like					NA	NA	NA	NA	2.96854	4.91638	0.00024698	0.0223488
1888	TR585113|c2_g1_i7	---NA---					NA	NA	NA	NA	4.45959	-0.952302	0.00039077	0.0280313
1889	TR585127|c1_g1_i4	---NA---		GO:0005509	calcium ion binding	Molecular Function	NA	NA	NA	NA	2.85419	0.95386	0.00111769	0.0467993
1890	TR585509|c1_g1_i2	buccalin precursor		GO:0005576,GO:0007218	extracellular region,neuropeptide signaling pathway	Cellular Component,Biological Process	NA	NA	NA	NA	1.45633	2.33319	0.00129655	0.049811
1891	TR585509|c1_g1_i4	buccalin precursor		GO:0005576,GO:0007218	extracellular region,neuropeptide signaling pathway	Cellular Component,Biological Process	NA	NA	NA	NA	2.07657	1.87624	0.000254451	0.0226693
1892	TR585542|c0_g1_i1	---NA---					NA	NA	NA	NA	3.49887	0.36532	2.30959e-05	0.00711739
1893	TR585924|c1_g1_i1	RNA polymerase II largest subunit	EC:2.7.7.6	GO:0003677,GO:0003899,GO:0006351	DNA binding,DNA-directed 5'-3' RNA polymerase activity,transcription DNA-templated	Molecular Function,Molecular Function,Biological Process	NA	NA	NA	NA	-7.39481	-0.468345	6.26411e-05	0.0112902
1894	TR585942|c1_g1_i1	PREDICTED: uncharacterized protein LOC101849878 isoform X1					NA	NA	NA	NA	4.27886	-0.204202	8.4496e-07	0.00156244
1895	TR585949|c0_g1_i5	---NA---					NA	NA	NA	NA	-5.47574	-0.649284	0.00086243	0.0418981
1896	TR585971|c2_g1_i4	AChain Twitchin Kinase Fragment (Aplysia) Autoregulated Kinase Domain	EC:2.7.11	GO:0004674,GO:0005524,GO:0006468	protein serine/threonine kinase activity,ATP binding,protein phosphorylation	Molecular Function,Molecular Function,Biological Process	NA	NA	NA	NA	1.93262	2.91715	0.000262678	0.0229117
1897	TR585990|c3_g2_i3	PREDICTED: uncharacterized protein LOC101863664					NA	NA	NA	NA	2.27751	3.17585	0.000707789	0.0375372
1898	TR585992|c3_g6_i3	Disintegrin and metallo ase domain-containing partial					NA	NA	NA	NA	1.56829	1.89343	0.000986259	0.0445052
1899	TR586009|c1_g2_i1	---NA---					NA	NA	NA	NA	2.9075	0.732196	0.000330874	0.025859
1900	TR586009|c1_g4_i2	---NA---					NA	NA	NA	NA	2.79593	5.1181	0.000627824	0.0354418
1901	TR586113|c1_g3_i4	enhancer of filamentation 1-like					NA	NA	NA	NA	3.15432	0.523867	0.000209392	0.0206947
1902	TR586166|c2_g2_i1	---NA---					NA	NA	NA	NA	1.24852	2.71173	0.000879956	0.0422272
1903	TR586173|c2_g1_i1	---NA---					NA	NA	NA	NA	2.99013	4.63788	1.49276e-05	0.0056979
1904	TR586344|c0_g1_i1	apolipo D-like					NA	NA	NA	NA	2.1481	1.88434	0.00084532	0.0415059
1905	TR586435|c5_g1_i8	---NA---					NA	NA	NA	NA	3.87153	1.05675	0.000187365	0.0199899
1906	TR586472|c2_g1_i4	Long-chain fatty acid transport 4		GO:0016020	membrane	Cellular Component	NA	NA	NA	NA	2.63523	4.18844	0.000204708	0.0204489
1907	TR586528|c1_g1_i1	pyridoxal phosphate phosphatase PHOSPHO2-like isoform X1					NA	NA	NA	NA	1.80126	0.975642	0.000158216	0.0184647
1908	TR586535|c3_g1_i3	short-chain specific acyl- mitochondrial-like	EC:1.3.99.3,EC:1.3.8.1	GO:0000062,GO:0003995,GO:0004085,GO:0005739,GO:0009055,GO:0033539,GO:0046359,GO:0050660,GO:0055088	fatty-acyl-CoA binding,acyl-CoA dehydrogenase activity,butyryl-CoA dehydrogenase activity,mitochondrion,electron carrier activity,fatty acid beta-oxidation using acyl-CoA dehydrogenase,butyrate catabolic process,flavin adenine dinucleotide binding,lipid homeostasis	Molecular Function,Molecular Function,Molecular Function,Cellular Component,Molecular Function,Biological Process,Biological Process,Molecular Function,Biological Process	NA	NA	NA	NA	-10.1393	1.90659	0.000709357	0.0375964
1909	TR586535|c3_g1_i4	short-chain specific acyl- mitochondrial-like	EC:1.3.99.3,EC:1.3.8.1	GO:0000062,GO:0003995,GO:0004085,GO:0005739,GO:0009055,GO:0033539,GO:0046359,GO:0050660,GO:0055088	fatty-acyl-CoA binding,acyl-CoA dehydrogenase activity,butyryl-CoA dehydrogenase activity,mitochondrion,electron carrier activity,fatty acid beta-oxidation using acyl-CoA dehydrogenase,butyrate catabolic process,flavin adenine dinucleotide binding,lipid homeostasis	Molecular Function,Molecular Function,Molecular Function,Cellular Component,Molecular Function,Biological Process,Biological Process,Molecular Function,Biological Process	NA	NA	NA	NA	1.84161	4.45474	4.81309e-05	0.00984035
1910	TR586550|c0_g2_i1	---NA---					NA	NA	NA	NA	-1.56964	4.54098	9.84552e-05	0.0140415
1911	TR586615|c0_g1_i4	Kelch 10					NA	NA	NA	NA	6.65975	0.43433	0.00103936	0.0453978
1913	TR586733|c2_g3_i1	---NA---					NA	NA	NA	NA	3.13934	3.0138	3.45089e-07	0.00102554
1914	TR586733|c2_g6_i1	---NA---					NA	NA	NA	NA	1.58463	2.33957	0.000930404	0.0434544
1915	TR586746|c3_g3_i2	axin-1 isoform X2					NA	NA	NA	NA	8.02312	0.117083	1.10985e-05	0.00507881
1916	TR586780|c1_g2_i4	PREDICTED: uncharacterized protein LOC101853991					NA	NA	NA	NA	3.61801	0.908281	3.41786e-07	0.00102554
1917	TR586974|c5_g4_i3	---NA---					NA	NA	NA	NA	5.17304	0.536068	0.000134791	0.0167155
1918	TR586978|c4_g2_i1	---NA---					NA	NA	NA	NA	-1.88448	2.04518	0.00012051	0.0156117
1919	TR587018|c2_g2_i4	---NA---					NA	NA	NA	NA	-2.44943	-0.372262	0.000387155	0.0279165
1920	TR587031|c3_g1_i2	---NA---					NA	NA	NA	NA	2.10513	7.30691	0.000648423	0.0358915
1921	TR587085|c0_g2_i2	---NA---					NA	NA	NA	NA	-2.26838	3.08226	0.000199458	0.0203181
1922	TR587099|c2_g1_i6	Kv channel-interacting 4-like isoform X9					NA	NA	NA	NA	3.41987	0.96163	6.91406e-05	0.0118137
1923	TR587129|c2_g1_i1	---NA---					NA	NA	NA	NA	-1.9453	1.86241	0.00103189	0.0453592
1924	TR587150|c1_g1_i6	---NA---					NA	NA	NA	NA	2.42189	1.52548	3.86793e-06	0.0031261
1925	TR587489|c1_g2_i3	PREDICTED: SCO-spondin-like					NA	NA	NA	NA	2.78993	6.91256	0.000258125	0.0226809
1926	TR587489|c1_g2_i4	PREDICTED: SCO-spondin-like					NA	NA	NA	NA	3.56582	8.01886	2.29579e-05	0.00710166
1927	TR587522|c2_g1_i1	tetraspanin isoform A		GO:0016020	membrane	Cellular Component	NA	NA	NA	NA	2.93945	0.109403	0.000548832	0.0331071
1928	TR587628|c6_g4_i1	---NA---					NA	NA	NA	NA	-3.89062	0.0213226	0.00074551	0.0386252
1930	TR587665|c6_g1_i3	Hexokinase type 2	EC:2.7.1.1	GO:0001678,GO:0004396,GO:0005524,GO:0005536,GO:0005623,GO:0006096,GO:0046835	cellular glucose homeostasis,hexokinase activity,ATP binding,glucose binding,cell,glycolytic process,carbohydrate phosphorylation	Biological Process,Molecular Function,Molecular Function,Molecular Function,Cellular Component,Biological Process,Biological Process	NA	NA	NA	NA	2.42423	1.5534	0.000440152	0.029801
1931	TR587665|c6_g1_i4	Hexokinase type 2	EC:2.7.1.1	GO:0001678,GO:0004396,GO:0005524,GO:0005536,GO:0005623,GO:0006096,GO:0046835	cellular glucose homeostasis,hexokinase activity,ATP binding,glucose binding,cell,glycolytic process,carbohydrate phosphorylation	Biological Process,Molecular Function,Molecular Function,Molecular Function,Cellular Component,Biological Process,Biological Process	NA	NA	NA	NA	3.02953	2.04829	0.000124423	0.0158088
1932	TR587665|c6_g1_i6	Hexokinase type 2	EC:2.7.1.1	GO:0001678,GO:0004396,GO:0005524,GO:0005536,GO:0005623,GO:0006096,GO:0046835	cellular glucose homeostasis,hexokinase activity,ATP binding,glucose binding,cell,glycolytic process,carbohydrate phosphorylation	Biological Process,Molecular Function,Molecular Function,Molecular Function,Cellular Component,Biological Process,Biological Process	NA	NA	NA	NA	4.82715	-0.116358	0.000444453	0.0298976
1935	TR588253|c1_g3_i1	---NA---					NA	NA	NA	NA	2.17507	0.828514	0.00108467	0.0462615
1937	TR588293|c3_g2_i3	caspase-7-like isoform X1		GO:0008233	peptidase activity	Molecular Function	NA	NA	NA	NA	1.13944	2.6364	0.00128491	0.0497963
1938	TR588427|c1_g1_i1	aquaporin -like		GO:0005215,GO:0006810,GO:0016021	transporter activity,transport,integral component of membrane	Molecular Function,Biological Process,Cellular Component	NA	NA	NA	NA	1.78329	4.17233	0.000169104	0.0189385
1939	TR588427|c1_g2_i4	aquaporin, partial		GO:0005215,GO:0006810,GO:0016021	transporter activity,transport,integral component of membrane	Molecular Function,Biological Process,Cellular Component	NA	NA	NA	NA	2.76893	0.856332	8.32507e-05	0.0130577
1940	TR588452|c4_g4_i2	BPTI Kunitz domain-containing 4-like					NA	NA	NA	NA	2.20277	1.01346	0.000313612	0.0252135
1941	TR588452|c4_g5_i1	BPTI Kunitz domain-containing 4-like					NA	NA	NA	NA	2.83548	1.58588	8.47115e-06	0.00451854
1943	TR588514|c4_g4_i1	---NA---					NA	NA	NA	NA	-2.18204	0.57057	0.000257661	0.0226809
1945	TR588571|c1_g2_i1	---NA---					NA	NA	NA	NA	-1.55136	5.39049	0.000980893	0.0443352
1947	TR588930|c2_g1_i2	Myosin alkali light chain 1		GO:0005509	calcium ion binding	Molecular Function	NA	NA	NA	NA	1.73922	3.28371	0.000950789	0.0438992
[truncated: 422 more rows]
